# Supplementary material for: Mechanistic aspects of reactive metabolite formation in clomethiazole catalyzed biotransformation by cytochrome P450 enzymes
Source: Royal Society of Chemistry journal article supplement (doi:10.1039/d3ob01014g), 2023-01-01
Supplement: d3ob01014g1.pdf [file d3ob01014g1.pdf]

## Mechanistic aspects of reactive metabolites formation in clomethiazole catalyzed biotransformation by cytochrome P450 enzymes.

Emadeldin M. Kamel<sup>a\*</sup>, Ahmed M. Tawfeek<sup>b</sup>, Ashraf A. El-Bassuony<sup>a</sup>, Al Mokhtar Lamsabhi<sup>c,d</sup>

<sup>a</sup>Chemistry Department, Faculty of Science, Beni-Suef University, Beni-Suef 62514, Egypt.

<sup>b</sup>Chemistry Department, College of Science, King Saud University, Riyadh 11451, Saudi Arabia

<sup>c</sup>Departamento de Química, Módulo 13, Universidad Autónoma de Madrid, Campus de Excelencia UAM-CSIC Cantoblanco, Madrid 28049, Spain.

<sup>d</sup>Institute for Advanced Research in Chemical Sciences (IAdChem), Universidad Autónoma de Madrid, Madrid 28049, Spain.

Email: [emad.abdelhameed@science.bsu.edu.eg](mailto:emad.abdelhameed@science.bsu.edu.eg)

### Table of Contents

|                                                                                                                                                                                                        |        |
|--------------------------------------------------------------------------------------------------------------------------------------------------------------------------------------------------------|--------|
| Table S1. Relative energy (RE) (in kcal/mol) and atomic energy (in a.u.) at the B3LYP level of theory for the MBI of P450 by CLM through 4-Me C-H hydroxylation (Path A).....                          | S2     |
| Table S2. Relative energy (RE) (in kcal/mol) and atomic energy (in a.u.) at the B3LYP-D3BJ level of theory for the MBI of P450 by CLM through 4-Me C-H hydroxylation (Path A).....                     | S2     |
| Table S3. Relative energy (RE) (in kcal/mol) and atomic energy (in a.u.) at the B3LYP level of theory for MBI of P450 by CLM through $\alpha$ -methylene C-H hydroxylation (Path B).....               | S3     |
| Table S4. Relative energy (RE) (in kcal/mol) and atomic energy (in a.u.) at the B3LYP level of theory for MBI of P450 by CLM through $\beta$ -methylene C-H hydroxylation (Path C).....                | S3     |
| Table S5. Relative energy (RE) (in kcal/mol) and atomic energy (in a.u.) at the B3LYP level of theory for MBI of P450 by CLM through S-oxidation (Path D).....                                         | S4     |
| Table S6. Relative energy (RE) (in kcal/mol) and atomic energy (in a.u.) at the B3LYP level of theory for the MBI of P450 by CLM through N-oxidation (Path E).....                                     | S4     |
| Table S7. Relative energy (RE) (in kcal/mol) and atomic energy (in a.u.) at the B3LYP level of theory for the MBI of P450 by CLM through C=N epoxidation pathway (oxaziridine Formation) (Path F)..... | S5     |
| Figure S1. Computed intrinsic reaction coordinate (IRC) of the rate-determining step transition states in paths A, B, C, D, E and F.....                                                               | S6     |
| Figure S2. The results of metadynamic simulations to investigate the possible interactions between clomethiazole and P450' active site. ....                                                           | S7     |
| Cartesian coordinates of all structures represented in this study.....                                                                                                                                 | S8-S78 |

**Table S1. Relative energy (RE) (in kcal/mol) and atomic energy (in a.u.) at the B3LYP level of theory for the MBI of P450 by CLM through 4-Me C-H hydroxylation (Path A).**

|                                  | UB3LYP/BS1     |        | UB3LYP/BS1+ZPE |        | UB3LYP/BS2//BS1 |        | UB3LYP/BS2//BS1+ZPE |        | UB3LYP/BS2//BS1 +Bulk Polarity |        | UB3LYP/BS2//BS1+ZPE +Bulk Polarity |        |
|----------------------------------|----------------|--------|----------------|--------|-----------------|--------|---------------------|--------|--------------------------------|--------|------------------------------------|--------|
|                                  | AE             | RE     | AE             | RE     | AE              | RE     | AE                  | RE     | AE                             | RE     | AE                                 | RE     |
| <sup>2</sup> RC <sub>A</sub>     | -2732.37785410 | 0.00   | -2731.95853010 | 0.00   | -2732.83787460  | 0.00   | -2732.41855060      | 0.00   | -2732.85450920                 | 0.00   | -2732.43518520                     | 0.00   |
| <sup>4</sup> RC <sub>A</sub>     | -2732.37764523 | 0.13   | -2731.95829223 | 0.15   | -2732.83773160  | 0.09   | -2732.41837860      | 0.11   | -2732.85442790                 | 0.05   | -2732.43507490                     | 0.07   |
| <sup>2</sup> TS-H <sub>A</sub>   | -2732.35525142 | 14.18  | -2731.94212942 | 10.29  | -2732.80753550  | 19.04  | -2732.39441350      | 15.15  | -2732.82516130                 | 18.42  | -2732.41203930                     | 14.52  |
| <sup>4</sup> TS-H <sub>A</sub>   | -2732.34692967 | 19.41  | -2731.93308067 | 15.97  | -2732.81332610  | 15.40  | -2732.39947710      | 11.97  | -2732.82899190                 | 16.01  | -2732.41514290                     | 12.58  |
| <sup>2</sup> INT <sub>A</sub>    | -2732.37377151 | 2.56   | -2731.95617351 | 1.48   | -2732.84353800  | -3.55  | -2732.42594000      | -4.64  | -2732.860671                   | -3.87  | -2732.44307330                     | -4.95  |
| <sup>4</sup> INT <sub>A</sub>    | -2732.37196076 | 3.70   | -2731.95551276 | 1.89   | -2732.83867140  | -0.50  | -2732.42222340      | -2.30  | -2732.853792                   | 0.45   | -2732.43734420                     | -1.35  |
| <sup>2</sup> TS-reb <sub>A</sub> | -2732.36941590 | 5.16   | -2731.95255490 | 3.60   | -2732.83952350  | -1.03  | -2732.42266250      | -2.69  | -2732.8555970                  | -0.73  | -2732.43873600                     | -2.30  |
| <sup>2</sup> P-OH <sub>A</sub>   | -2732.45693334 | -49.62 | -2732.03298934 | -46.72 | -2732.91274100  | -46.98 | -2732.48879700      | -44.08 | -2732.942409                   | -55.16 | -2732.51846500                     | -52.26 |
| <sup>4</sup> P-OH <sub>A</sub>   | -2732.43634133 | -36.70 | -2732.01542033 | -35.70 | -2732.89541000  | -36.10 | -2732.47448900      | -35.10 | -2732.922596                   | -42.73 | -2732.50167500                     | -41.72 |

**Table S2. Relative energy (RE) (in kcal/mol) and atomic energy (in a.u.) at the B3LYP-D3BJ level of theory for the MBI of P450 by CLM through 4-Me C-H hydroxylation (Path A).**

|                                  | UB3LYP-D3BJ/BS1 |        | UB3LYP- D3BJ /BS1+ZPE |        | UB3LYP- D3BJ /BS2//BS1 |        | UB3LYP D3BJ /BS2//BS1+ZPE |        | UB3LYP- D3BJ /BS2//BS1 +Bulk Polarity |        | UB3LYP- D3BJ /BS2//BS1+ZPE+Bulk Polarity |        |
|----------------------------------|-----------------|--------|-----------------------|--------|------------------------|--------|---------------------------|--------|---------------------------------------|--------|------------------------------------------|--------|
|                                  | AE              | RE     | AE                    | RE     | AE                     | RE     | AE                        | RE     | AE                                    | RE     | AE                                       | RE     |
| <sup>2</sup> RC <sub>A</sub>     | -2732.55339500  | 0.00   | -2732.13189300        | 0.00   | -2733.01315100         | 0.00   | -2732.59164900            | 0.00   | -2733.02860900                        | 0.00   | -2732.60710700                           | 0.00   |
| <sup>4</sup> RC <sub>A</sub>     | -2732.55327000  | 0.08   | -2732.13174200        | 0.09   | -2733.01295200         | 0.12   | -2732.59142400            | 0.14   | -2733.02849600                        | 0.07   | -2732.60696800                           | 0.09   |
| <sup>2</sup> TS-H <sub>A</sub>   | -2732.52864140  | 15.53  | -2732.11332040        | 11.65  | -2732.98701235         | 16.40  | -2732.57169135            | 12.52  | -2733.00196130                        | 16.72  | -2732.58664030                           | 12.84  |
| <sup>4</sup> TS-H <sub>A</sub>   | -2732.52542310  | 17.55  | -2732.11090010        | 13.17  | -2732.99032610         | 14.32  | -2732.57580310            | 9.94   | -2733.00705410                        | 13.53  | -2732.59253110                           | 9.15   |
| <sup>2</sup> INT <sub>A</sub>    | -2732.52522300  | 17.68  | -2732.10507900        | 16.83  | -2733.00822700         | 3.09   | -2732.58808300            | 2.24   | -2733.022684                          | 3.72   | -2732.60254000                           | 2.87   |
| <sup>4</sup> INT <sub>A</sub>    | -2732.54205700  | 7.11   | -2732.12304200        | 5.55   | -2733.01342100         | -0.17  | -2732.59440600            | -1.73  | -2733.027502                          | 0.69   | -2732.60848700                           | -0.87  |
| <sup>2</sup> TS-reb <sub>A</sub> | -2732.54174700  | 7.23   | -2732.12289700        | 5.55   | -2733.01072400         | 1.52   | -2732.59187400            | -0.28  | -2733.03176800                        | -2.05  | -2732.61291800                           | -3.73  |
| <sup>2</sup> P-OH <sub>A</sub>   | -2732.62414000  | -44.39 | -2732.19881800        | -42.00 | -2733.09375000         | -50.58 | -2732.66842800            | -48.18 | -2733.108741                          | -50.28 | -2732.68341900                           | -47.89 |
| <sup>4</sup> P-OH <sub>A</sub>   | -2732.61285700  | -37.31 | -2732.18979400        | -36.33 | -2733.08394400         | -44.42 | -2732.66088100            | -43.44 | -2733.097571                          | -43.27 | -2732.67450800                           | -42.29 |

**Table S3. Relative energy (RE) (in kcal/mol) and atomic energy (in a.u.) at the B3LYP level of theory for the MBI of P450 by CLM through  $\alpha$ -methylene C-H hydroxylation (Path B).**

|                                  | UB3LYP/BS1     |        | UB3LYP/BS1+ZPE |        | UB3LYP/BS2//BS1 |        | UB3LYP/BS2//BS1+ZPE |        | UB3LYP/BS2//BS1 +Bulk Polarity |        | UB3LYP/BS2//BS1+ZPE +Bulk Polarity |        |
|----------------------------------|----------------|--------|----------------|--------|-----------------|--------|---------------------|--------|--------------------------------|--------|------------------------------------|--------|
|                                  | AE             | RE     | AE             | RE     | AE              | RE     | AE                  | RE     | AE                             | RE     | AE                                 | RE     |
| <sup>2</sup> RC <sub>B</sub>     | -2732.37975765 | 0.00   | -2731.96030265 | 0.00   | -2732.84004990  | 0.00   | -2732.42059490      | 0.00   | -2732.85639960                 | 0.00   | -2732.43694460                     | 0.00   |
| <sup>4</sup> RC <sub>B</sub>     | -2732.37968993 | 0.04   | -2731.96016593 | 0.09   | -2732.83993470  | 0.07   | -2732.42041070      | 0.12   | -2732.85633300                 | 0.04   | -2732.43680900                     | 0.09   |
| <sup>2</sup> TS-H <sub>B</sub>   | -2732.34121966 | 24.18  | -2731.92923866 | 19.49  | -2732.807114    | 20.67  | -2732.39513320      | 15.98  | -2732.8232613                  | 20.79  | -2732.41128030                     | 16.10  |
| <sup>4</sup> TS-H <sub>B</sub>   | -2732.34026993 | 24.78  | -2731.92795993 | 20.30  | -2732.806961    | 20.76  | -2732.39465050      | 16.28  | -2732.8218826                  | 21.66  | -2732.40957260                     | 17.18  |
| <sup>2</sup> INT <sub>B</sub>    | -2732.35641677 | 14.65  | -2731.94129077 | 11.93  | -2732.827497    | 7.88   | -2732.41237070      | 5.16   | -2732.843476                   | 8.11   | -2732.42834980                     | 5.39   |
| <sup>4</sup> INT <sub>B</sub>    | -2732.35631794 | 14.71  | -2731.94026894 | 12.57  | -2732.829715    | 6.49   | -2732.41366570      | 4.35   | -2732.843755                   | 7.93   | -2732.42770570                     | 5.80   |
| <sup>2</sup> TS-reb <sub>B</sub> | -2732.35541748 | 15.27  | -2731.94040648 | 12.49  | -2732.827715    | 7.74   | -2732.41270370      | 4.95   | -2732.841755                   | 9.19   | -2732.42674370                     | 6.40   |
| <sup>4</sup> TS-reb <sub>B</sub> | -2732.35064600 | 18.27  | -2731.93478700 | 16.01  | -2732.827898    | 7.63   | -2732.41203940      | 5.37   | -2732.839357                   | 10.69  | -2732.42349800                     | 8.44   |
| <sup>2</sup> P-OH <sub>B</sub>   | -2732.46044136 | -50.63 | -2732.03837236 | -48.99 | -2732.931457    | -57.36 | -2732.50938800      | -55.72 | -2732.948287                   | -57.66 | -2732.52621800                     | -56.02 |
| <sup>4</sup> P-OH <sub>B</sub>   | -2732.44416634 | -40.42 | -2732.03184634 | -44.89 | -2732.911382    | -44.83 | -2732.49906200      | -49.24 | -2732.924823                   | -42.94 | -2732.51250300                     | -47.41 |

**Table S4. Relative energy (RE) (in kcal/mol) and atomic energy (in a.u.) at the B3LYP level of theory for the MBI of P450 by CLM through  $\beta$ -methylene C-H hydroxylation (Path C).**

|                                  | UB3LYP/BS1     |        | UB3LYP/BS1+ZPE |        | UB3LYP/BS2//BS1 |        | UB3LYP/BS2//BS1+ZPE |        | UB3LYP/BS2//BS1 +Bulk Polarity |        | UB3LYP/BS2//BS1+ZPE+ Bulk Polarity |        |
|----------------------------------|----------------|--------|----------------|--------|-----------------|--------|---------------------|--------|--------------------------------|--------|------------------------------------|--------|
|                                  | AE             | RE     | AE             | RE     | AE              | RE     | AE                  | RE     | AE                             | RE     | AE                                 | RE     |
| <sup>2</sup> RC <sub>C</sub>     | -2732.37970048 | 0.00   | -2731.96038248 | 0.00   | -2732.84131670  | 0.00   | -2732.42199870      | 0.00   | -2732.85715820                 | 0.00   | -2732.43784020                     | 0.00   |
| <sup>4</sup> RC <sub>C</sub>     | -2732.37962429 | 0.05   | -2731.96023729 | 0.09   | -2732.84116300  | 0.10   | -2732.42177600      | 0.14   | -2732.85707400                 | 0.05   | -2732.43768700                     | 0.10   |
| <sup>2</sup> TS-H <sub>C</sub>   | -2732.34471916 | 21.95  | -2731.93221716 | 17.67  | -2732.80909330  | 20.22  | -2732.39659130      | 15.94  | -2732.82542790                 | 19.91  | -2732.41292590                     | 15.63  |
| <sup>4</sup> TS-H <sub>C</sub>   | -2732.34566449 | 21.36  | -2731.93253949 | 17.47  | -2732.81113580  | 18.94  | -2732.39801080      | 15.05  | -2732.82599200                 | 19.56  | -2732.41286700                     | 15.67  |
| <sup>2</sup> INT <sub>C</sub>    | -2732.38468956 | -3.13  | -2731.96861556 | -5.17  | -2732.85526100  | -8.75  | -2732.43918700      | -10.79 | -2732.87155130                 | -9.03  | -2732.45547730                     | -11.07 |
| <sup>4</sup> INT <sub>C</sub>    | -2732.38470504 | -3.14  | -2731.96788804 | -4.71  | -2732.85695980  | -9.82  | -2732.44014280      | -11.39 | -2732.87134810                 | -8.90  | -2732.45453110                     | -10.47 |
| <sup>2</sup> TS-reb <sub>C</sub> | -2732.37710556 | 1.63   | -2731.95728556 | 1.94   | -2732.85324500  | -7.49  | -2732.43342500      | -7.17  | -2732.86924150                 | -7.58  | -2732.44942150                     | -7.27  |
| <sup>4</sup> TS-reb <sub>C</sub> | -2732.37796607 | 1.09   | -2731.95805607 | 1.46   | -2732.85213500  | -6.79  | -2732.43222500      | -6.42  | -2732.86733830                 | -6.39  | -2732.44742830                     | -6.02  |
| <sup>2</sup> P-OH <sub>C</sub>   | -2732.45660800 | -48.26 | -2732.03414500 | -46.29 | -2732.92688800  | -53.70 | -2732.50442500      | -51.72 | -2732.94069700                 | -52.42 | -2732.51823400                     | -50.45 |
| <sup>4</sup> P-OH <sub>C</sub>   | -2732.43729300 | -36.14 | -2732.01785500 | -36.06 | -2732.90836300  | -42.07 | -2732.48892500      | -42.00 | -2732.92232900                 | -40.90 | -2732.50289100                     | -40.82 |

**Table S5. Relative energy (RE) (in kcal/mol) and atomic energy (in a.u.) at the B3LYP level of theory for the MBI of P450 by CLM through S-oxidation (Path D).**

|                                | UB3LYP/BS1     |       | UB3LYP/BS1+ZPE |       | UB3LYP/BS2//BS1 |       | UB3LYP/BS2//BS1+ZP<br>E |       | UB3LYP/BS2//BS1+Bulk<br>Polarity |       | UB3LYP/BS2//BS1+ZP<br>E+Bulk Polarity |       |
|--------------------------------|----------------|-------|----------------|-------|-----------------|-------|-------------------------|-------|----------------------------------|-------|---------------------------------------|-------|
|                                | AE             | RE    | AE             | RE    | AE              | RE    | AE                      | RE    | AE                               | RE    | AE                                    | RE    |
| <sup>2</sup> RC <sub>D</sub>   | -2732.37995001 | 0.00  | -2731.96048801 | 0.00  | -2732.84044630  | 0.00  | -2732.42098430          | 0.00  | -2732.85694910                   | 0.00  | -2732.43748710                        | 0.00  |
| <sup>4</sup> RC <sub>D</sub>   | -2732.37981931 | 0.08  | -2731.96033831 | 0.09  | -2732.84028350  | 0.10  | -2732.42080250          | 0.11  | -2732.85682770                   | 0.08  | -2732.43734670                        | 0.09  |
| <sup>2</sup> TS-S <sub>D</sub> | -2732.34898659 | 19.43 | -2731.93073859 | 18.67 | -2732.81184680  | 17.95 | -2732.39359880          | 17.18 | -2732.82866760                   | 17.75 | -2732.41041960                        | 16.99 |
| <sup>4</sup> TS-S <sub>D</sub> | -2732.33887880 | 25.77 | -2731.92094980 | 24.81 | -2732.80410650  | 22.80 | -2732.38617750          | 21.84 | -2732.81914560                   | 23.72 | -2732.40121660                        | 22.76 |
| <sup>2</sup> P-S <sub>D</sub>  | -2732.38780061 | -4.93 | -2731.96683461 | -3.98 | -2732.85156400  | -6.98 | -2732.43059800          | -6.03 | -2732.86691240                   | -6.25 | -2732.44594640                        | -5.31 |
| <sup>4</sup> P-S <sub>D</sub>  | -2732.38550124 | -3.48 | -2731.96590324 | -3.40 | -2732.84896210  | -5.34 | -2732.42936410          | -5.26 | -2732.86392450                   | -4.38 | -2732.44432650                        | -4.29 |

**Table S6. Relative energy (RE) (in kcal/mol) and atomic energy (in a.u.) at the B3LYP level of theory for the MBI of P450 by CLM through N-oxidation (Path E).**

|                                | UB3LYP/BS1     |        | UB3LYP/BS1+ZPE |        | UB3LYP/BS2//BS1 |        | UB3LYP/BS2//BS1+ZPE |        | UB3LYP/BS2//BS1+Bulk<br>Polarity |        | UB3LYP/BS2//BS1+ZPE<br>+Bulk Polarity |        |
|--------------------------------|----------------|--------|----------------|--------|-----------------|--------|---------------------|--------|----------------------------------|--------|---------------------------------------|--------|
|                                | AE             | RE     | AE             | RE     | AE              | RE     | AE                  | RE     | AE                               | RE     | AE                                    | RE     |
| <sup>2</sup> RC <sub>E</sub>   | -2732.37872345 | 0.00   | -2731.95937845 | 0.00   | -2732.84126250  | 0.00   | -2732.42191750      | 0.00   | -2732.85765420                   | 0.00   | -2732.43830920                        | 0.00   |
| <sup>4</sup> RC <sub>E</sub>   | -2732.37829146 | 0.27   | -2731.95870946 | 0.42   | -2732.84077250  | 0.31   | -2732.42119050      | 0.46   | -2732.85753440                   | 0.08   | -2732.43795240                        | 0.22   |
| <sup>2</sup> TS-N <sub>E</sub> | -2732.34677600 | 20.05  | -2731.92704100 | 20.29  | -2732.80933500  | 20.03  | -2732.38960000      | 20.28  | -2732.82913300                   | 17.90  | -2732.40939800                        | 18.14  |
| <sup>4</sup> TS-N <sub>E</sub> | -2732.33023300 | 30.43  | -2731.91189100 | 29.80  | -2732.80175700  | 24.79  | -2732.38341500      | 24.16  | -2732.81967900                   | 23.83  | -2732.40133700                        | 23.20  |
| <sup>2</sup> P-N <sub>E</sub>  | -2732.40929400 | -19.18 | -2731.98690400 | -17.27 | -2732.87407300  | -20.59 | -2732.45168300      | -18.68 | -2732.89125400                   | -21.08 | -2732.46886400                        | -19.17 |
| <sup>4</sup> P-N <sub>E</sub>  | -2732.38774300 | -5.66  | -2731.96821400 | -5.54  | -2732.85386800  | -7.91  | -2732.43433900      | -7.79  | -2732.87043600                   | -8.02  | -2732.45090700                        | -7.91  |

**Table S7. Relative energy (RE) (in kcal/mol) and atomic energy (in a.u.) at the B3LYP level of theory for the MBI of P450 by CLM through C=N epoxidation pathway (oxaziridine Formation) (Path F).**

|                                  | UB3LYP/BS1     |        | UB3LYP/BS1+ZPE |        | UB3LYP/BS2//BS1 |        | UB3LYP/BS2//BS1+ZPE |        | UB3LYP/BS2//BS1+Bulk Polarity |        | UB3LYP/BS2//BS1+ZPE+ Bulk Polarity |        |
|----------------------------------|----------------|--------|----------------|--------|-----------------|--------|---------------------|--------|-------------------------------|--------|------------------------------------|--------|
|                                  | AE             | RE     | AE             | RE     | AE              | RE     | AE                  | RE     | AE                            | RE     | AE                                 | RE     |
| <sup>2</sup> RC <sub>F</sub>     | -2732.36813820 | 0.00   | -2731.94988820 | 0.00   | -2732.83147450  | 0.00   | -2732.41322450      | 0.00   | -2732.84785610                | 0.00   | -2732.42960610                     | 0.00   |
| <sup>4</sup> RC <sub>F</sub>     | -2732.36803277 | 0.07   | -2731.94959177 | 0.19   | -2732.83056321  | 0.57   | -2732.41212221      | 0.69   | -2732.84771421                | 0.09   | -2732.42927321                     | 0.21   |
| <sup>2</sup> TS-O <sub>F</sub>   | -2732.35138000 | 10.52  | -2731.93329000 | 10.42  | -2732.81855000  | 8.11   | -2732.40046000      | 8.01   | -2732.83377000                | 8.84   | -2732.41568000                     | 8.74   |
| <sup>4</sup> TS-O <sub>F</sub>   | -2732.35226700 | 9.96   | -2731.93351300 | 10.28  | -2732.81394600  | 11.00  | -2732.39519200      | 11.32  | -2732.83231200                | 9.75   | -2732.41355800                     | 10.07  |
| <sup>2</sup> INT-O <sub>F</sub>  | -2732.38455420 | -10.30 | -2731.96714220 | -10.83 | -2732.83914780  | -4.82  | -2732.42173580      | -5.34  | -2732.85621                   | -5.24  | -2732.43879800                     | -5.77  |
| <sup>4</sup> INT-O <sub>F</sub>  | -2732.39225700 | -15.13 | -2731.97328000 | -14.68 | -2732.83679620  | -3.34  | -2732.41781920      | -2.88  | -2732.852521                  | -2.93  | -2732.43354440                     | -2.47  |
| <sup>2</sup> TS-epo <sub>F</sub> | -2732.38194278 | -8.73  | -2731.96372866 | -8.87  | -2732.83598720  | -2.83  | -2732.41777308      | -3.55  | -2732.85321500                | -3.45  | -2732.43500088                     | -3.59  |
| <sup>4</sup> TS-epo <sub>F</sub> | -2732.38044278 | -7.72  | -2731.96292878 | -8.18  | -2732.83423540  | -1.73  | -2732.41672140      | -2.19  | -2732.850125                  | -1.42  | -2732.43261050                     | -1.89  |
| <sup>2</sup> P-epo <sub>F</sub>  | -2732.40574133 | -23.60 | -2731.98741733 | -23.55 | -2732.85814780  | -16.74 | -2732.43982380      | -16.69 | -2732.875725                  | -17.49 | -2732.45740140                     | -17.44 |
| <sup>4</sup> P-epo <sub>F</sub>  | -2732.39745893 | -18.40 | -2731.98153793 | -19.86 | -2732.85014560  | -11.72 | -2732.43422460      | -13.18 | -2732.868871                  | -13.19 | -2732.45295000                     | -14.65 |

**Table S8. The electronic energy in Hartree of various species studied in reactive metabolites formation mechanisms.**

| Structure    | EE+ZPE (Hartree) | RE (kcal/mol) |
|--------------|------------------|---------------|
| P-epo + -OMe | -1336.809357     | 0.00          |
| TS-OMe1      | -1336.78574      | 14.82         |
| TS-OMe2      | -1336.795599     | 8.63          |
| P-OMe1       | -1336.849909     | -25.45        |
| P-OMe2       | -1336.866537     | -35.88        |
| P-epo + -SMe | -1659.855258     | 0.00          |
| TS-SMe1      | -1659.827451     | 17.45         |
| TS-SMe2      | -1659.834251     | 13.18         |
| P-SMe1       | -1659.890606     | -22.18        |
| P-SMe2       | -1659.90013      | -28.16        |
| P-epo + HOH  | -1298.134499     | 0.00          |
| TS-diol      | -1298.095815     | 24.27         |
| P-diol       | -1298.173563     | -24.51        |
| TS-R1        | -1298.103312     | 19.57         |
| TS-R2        | -1298.099678     | 21.85         |
| P-R1         | -1298.15631      | -13.69        |
| P-R2         | -1298.15711      | -14.19        |

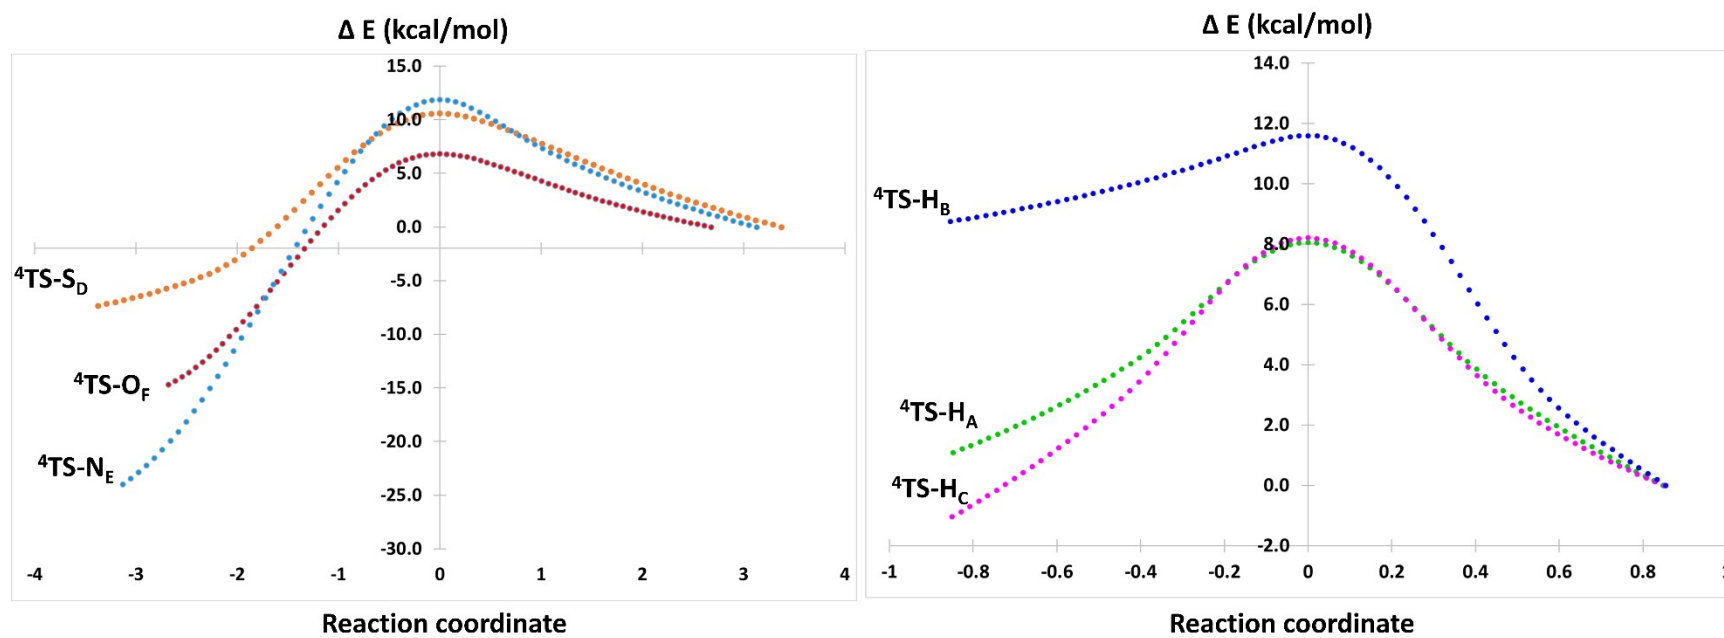

Figure S1. Computed intrinsic reaction coordinate (IRC) of the rate-determining step transition states in paths A, B, and C (right) and D, E, and F (left).

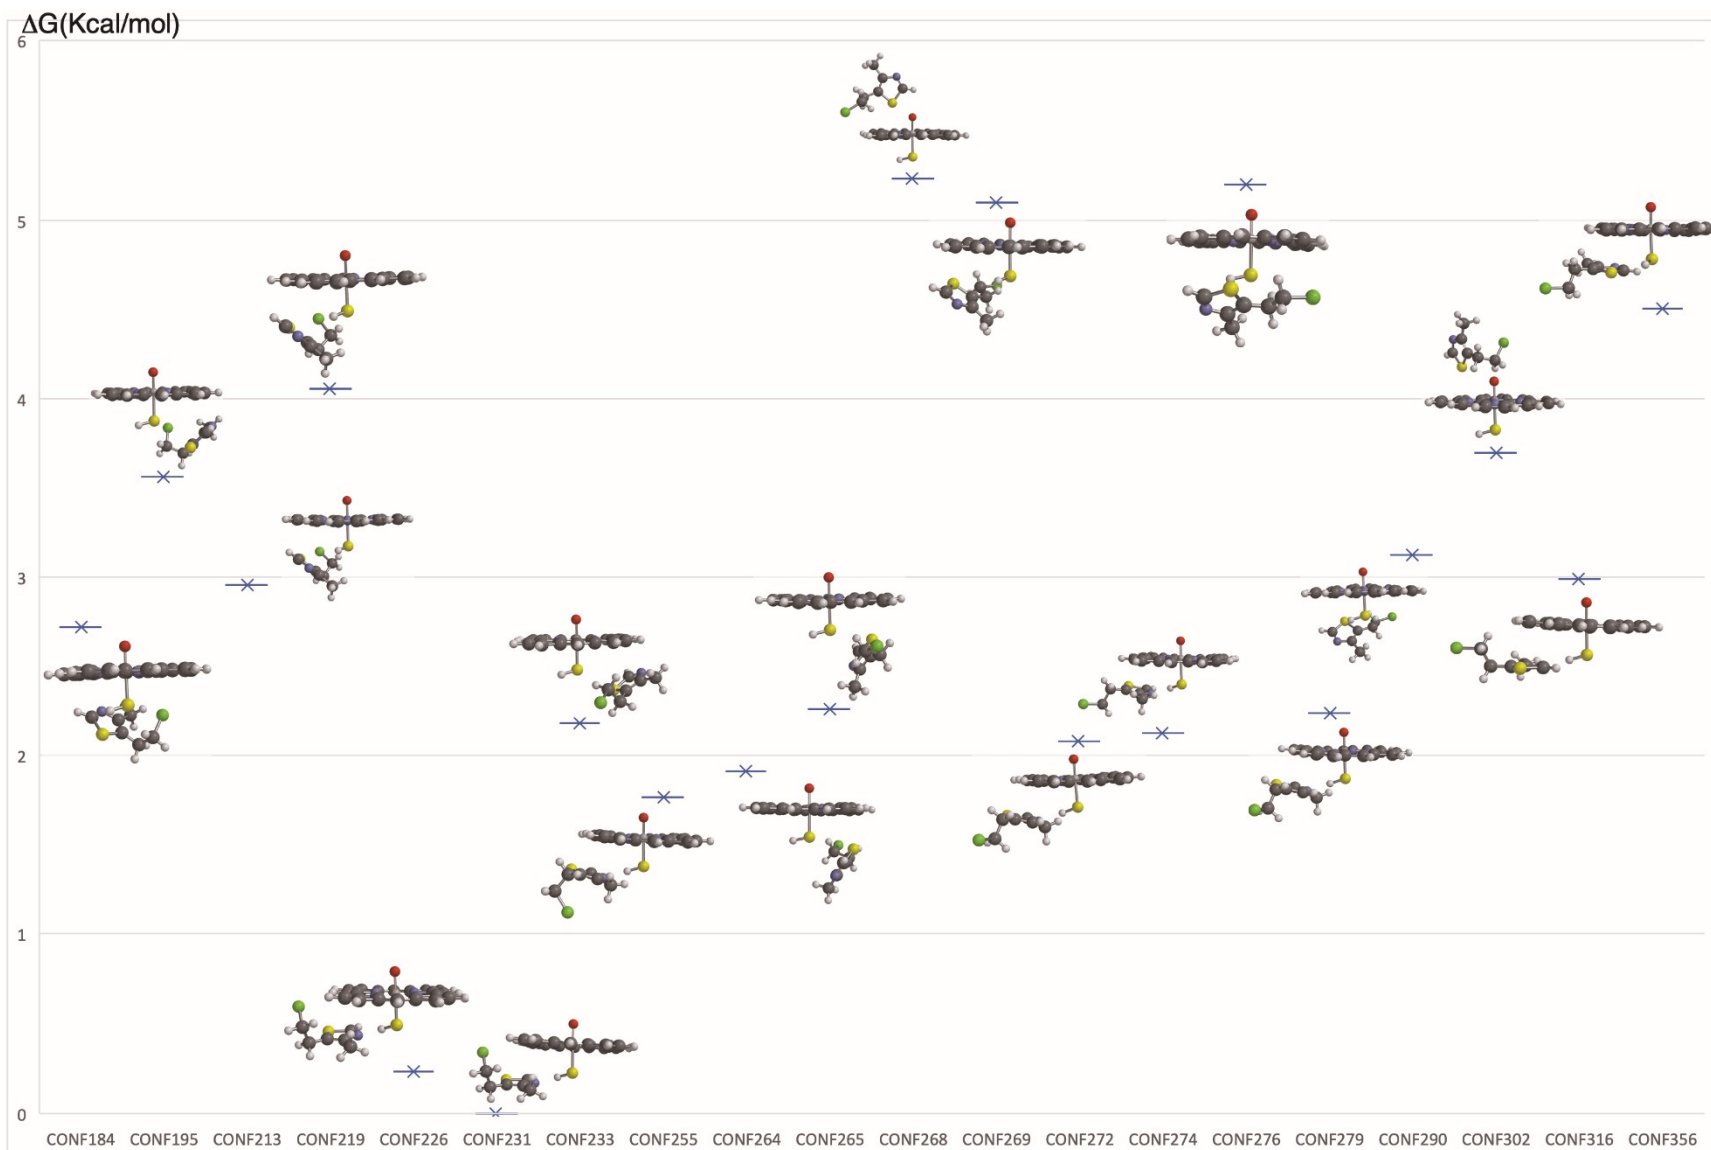

**Figure S2.** The results of metadynamics simulations to investigate the possible interactions between clomethiazole and P450' active site.

## Cartesian coordinates of all structures represented in this study

<sup>2</sup>RC<sub>A</sub>

|    |          |          |          |
|----|----------|----------|----------|
| Fe | -1.84948 | 0.00954  | -0.05458 |
| O  | -0.63845 | -0.52971 | 0.88782  |
| S  | -3.80125 | 1.14848  | -1.28977 |
| H  | -4.81047 | 0.44633  | -0.72633 |
| N  | -2.80715 | 0.94873  | 1.46297  |
| C  | -4.06285 | 1.34199  | 3.36644  |
| C  | -3.35211 | 2.47377  | 3.11468  |
| H  | -4.76228 | 1.14917  | 4.16983  |
| H  | -3.34739 | 3.40424  | 3.66778  |
| N  | -0.91444 | 1.74187  | -0.50607 |
| C  | -0.92043 | 2.90026  | 0.22634  |
| C  | -0.0212  | 3.86744  | -0.35584 |
| C  | 0.53493  | 3.27691  | -1.44763 |
| H  | 0.14728  | 4.86334  | 0.03338  |
| H  | 1.25858  | 3.68345  | -2.14192 |
| N  | -1.12793 | -0.8169  | -1.74012 |
| C  | -0.21353 | -0.26858 | -2.59714 |
| C  | -1.35943 | -2.08603 | -2.1998  |
| C  | 0.14334  | -1.21358 | -3.6272  |
| C  | -0.57267 | -2.34497 | -3.38129 |
| H  | 0.84913  | -1.01771 | -4.42381 |
| H  | -0.58088 | -3.27426 | -3.93638 |
| N  | -3.00666 | -1.61619 | 0.24407  |
| C  | -3.87263 | -3.75488 | 0.11239  |
| H  | -4.03957 | -4.75214 | -0.27408 |
| C  | -2.98807 | -2.78131 | -0.47957 |
| C  | -3.70999 | 0.39044  | 2.34125  |
| C  | -2.564   | 2.2198   | 1.93358  |
| C  | -0.02415 | 1.94959  | -1.53083 |
| C  | -2.22799 | -3.00265 | -1.61989 |
| H  | -2.31422 | -3.97551 | -2.09449 |
| C  | -4.20035 | -0.90264 | 2.26352  |
| H  | -4.90385 | -1.21511 | 3.02933  |
| C  | -1.67969 | 3.1238   | 1.36869  |
| H  | -1.57904 | 4.0908   | 1.85196  |
| C  | 0.30589  | 1.01872  | -2.50402 |
| H  | 1.05033  | 1.30711  | -3.23754 |
| C  | -4.42142 | -3.16633 | 1.21016  |
| H  | -5.13364 | -3.57879 | 1.9133   |
| C  | -3.87249 | -1.83393 | 1.28215  |
| C  | 4.80214  | 0.20235  | 0.24316  |
| C  | 3.74692  | -0.13489 | -0.57244 |
| C  | 4.62937  | 1.44738  | -1.85259 |



|                              |          |          |          |
|------------------------------|----------|----------|----------|
| S                            | 5.73867  | 1.47513  | -0.50997 |
| H                            | 4.76476  | 2.11465  | -2.69655 |
| N                            | 3.66345  | 0.58471  | -1.75407 |
| C                            | 5.20642  | -0.38657 | 1.56793  |
| C                            | 6.2684   | -1.47759 | 1.39176  |
| H                            | 4.32808  | -0.8134  | 2.06163  |
| H                            | 5.5962   | 0.38827  | 2.23702  |
| H                            | 5.89191  | -2.30646 | 0.78985  |
| H                            | 7.17567  | -1.08495 | 0.92881  |
| Cl                           | 6.7656   | -2.17873 | 2.99415  |
| C                            | 2.70282  | -1.17838 | -0.28961 |
| H                            | 2.51828  | -1.77508 | -1.18894 |
| H                            | 3.00991  | -1.85421 | 0.51335  |
| H                            | 1.74719  | -0.72605 | 0.00293  |
| <sup>4</sup> RC <sub>A</sub> |          |          |          |
| Fe                           | -1.8434  | 0.01256  | -0.05169 |
| O                            | -0.6432  | -0.33049 | 0.99423  |
| S                            | -3.72963 | 0.82392  | -1.583   |
| H                            | -4.77094 | 0.36737  | -0.85099 |
| N                            | -2.72937 | 1.392    | 1.12769  |
| C                            | -3.95486 | 2.38521  | 2.82097  |
| C                            | -3.19123 | 3.35822  | 2.2558   |
| H                            | -4.65859 | 2.46971  | 3.63915  |
| H                            | -3.138   | 4.4084   | 2.51267  |
| N                            | -0.82179 | 1.48585  | -0.9767  |
| C                            | -0.76108 | 2.80541  | -0.61172 |
| C                            | 0.17817  | 3.51546  | -1.44606 |
| C                            | 0.68975  | 2.60681  | -2.31944 |
| H                            | 0.40112  | 4.57127  | -1.36092 |
| H                            | 1.4238   | 2.75759  | -3.10007 |
| N                            | -1.18262 | -1.30451 | -1.42809 |
| C                            | -0.24955 | -1.07584 | -2.40082 |
| C                            | -1.48604 | -2.63731 | -1.504   |
| C                            | 0.04791  | -2.29539 | -3.1126  |
| C                            | -0.72507 | -3.26775 | -2.55599 |
| H                            | 0.75622  | -2.37538 | -3.92687 |
| H                            | -0.78738 | -4.31587 | -2.81934 |
| N                            | -3.07734 | -1.39852 | 0.69944  |
| C                            | -4.0533  | -3.4369  | 1.18318  |
| H                            | -4.27615 | -4.49273 | 1.09754  |
| C                            | -3.12867 | -2.72095 | 0.33838  |
| C                            | -3.65507 | 1.15965  | 2.12193  |
| C                            | -2.42299 | 2.73241  | 1.2078   |
| C                            | 0.06393  | 1.34269  | -2.01707 |
| C                            | -2.39683 | -3.2996  | -0.68963 |
| H                            | -2.54091 | -4.36137 | -0.86583 |

|                                |          |          |          |
|--------------------------------|----------|----------|----------|
| C                              | -4.20897 | -0.07377 | 2.42255  |
| H                              | -4.91931 | -0.11379 | 3.24281  |
| C                              | -1.49761 | 3.38813  | 0.41273  |
| H                              | -1.34533 | 4.44747  | 0.5954   |
| C                              | 0.33479  | 0.15563  | -2.68041 |
| H                              | 1.08436  | 0.18234  | -3.46325 |
| C                              | -4.55564 | -2.53145 | 2.06659  |
| H                              | -5.27798 | -2.68781 | 2.85751  |
| C                              | -3.9392  | -1.26483 | 1.75437  |
| C                              | 4.77483  | 0.18274  | 0.14383  |
| C                              | 3.74186  | -0.42455 | -0.53188 |
| C                              | 4.65484  | 0.63303  | -2.25516 |
| S                              | 5.72854  | 1.13032  | -0.97699 |
| H                              | 4.81137  | 0.97187  | -3.27325 |
| N                              | 3.68769  | -0.15345 | -1.89    |
| C                              | 5.14384  | 0.08693  | 1.5998   |
| C                              | 6.21635  | -0.9826  | 1.83413  |
| H                              | 4.25373  | -0.15952 | 2.18656  |
| H                              | 5.50925  | 1.0494   | 1.9742   |
| H                              | 5.86334  | -1.97211 | 1.53853  |
| H                              | 7.13601  | -0.75627 | 1.29135  |
| Cl                             | 6.66555  | -1.09159 | 3.59268  |
| C                              | 2.69245  | -1.31892 | 0.06703  |
| H                              | 2.50373  | -2.16776 | -0.59798 |
| H                              | 2.99754  | -1.70821 | 1.04236  |
| H                              | 1.73951  | -0.79251 | 0.20244  |
| <sup>2</sup> TS-H <sub>A</sub> |          |          |          |
| Fe                             | 1.36797  | 0.26609  | -0.16788 |
| O                              | 0.05268  | -0.51669 | 0.64955  |
| S                              | 3.10018  | 1.74513  | -1.08179 |
| H                              | 3.88211  | 1.83688  | 0.01744  |
| N                              | 1.14072  | 1.8207   | 1.12531  |
| C                              | 0.32306  | 3.72875  | 2.14297  |
| C                              | 1.21074  | 3.16608  | 3.00567  |
| H                              | -0.25773 | 4.63376  | 2.26748  |
| H                              | 1.50844  | 3.51097  | 3.98769  |
| N                              | 2.68323  | -0.56542 | 1.11955  |
| C                              | 3.04108  | -0.11308 | 2.36008  |
| C                              | 3.93246  | -1.05191 | 3.00061  |
| C                              | 4.09691  | -2.08671 | 2.13202  |
| H                              | 4.36069  | -0.92299 | 3.98645  |
| H                              | 4.68991  | -2.98395 | 2.25508  |
| N                              | 1.70396  | -1.18886 | -1.50377 |
| C                              | 2.48115  | -2.30147 | -1.31083 |
| C                              | 1.2327   | -1.28009 | -2.78773 |
| C                              | 2.47965  | -3.12818 | -2.49452 |

|                                |          |          |          |
|--------------------------------|----------|----------|----------|
| C                              | 1.70855  | -2.48893 | -3.41618 |
| H                              | 3.01459  | -4.06398 | -2.5943  |
| H                              | 1.47596  | -2.7916  | -4.42915 |
| N                              | 0.19424  | 1.19959  | -1.51455 |
| C                              | -1.00811 | 1.7308   | -3.41703 |
| H                              | -1.38461 | 1.64537  | -4.4284  |
| C                              | -0.08957 | 0.8052   | -2.79958 |
| C                              | 0.28342  | 2.88074  | 0.97282  |
| C                              | 1.70602  | 1.96715  | 2.36856  |
| C                              | 3.30925  | -1.77273 | 0.96288  |
| C                              | 0.40667  | -0.34381 | -3.40202 |
| H                              | 0.10928  | -0.53801 | -4.42825 |
| C                              | -0.50522 | 3.11639  | -0.14535 |
| H                              | -1.14272 | 3.9951   | -0.12543 |
| C                              | 2.59917  | 1.07353  | 2.94107  |
| H                              | 2.96722  | 1.30542  | 3.93614  |
| C                              | 3.21381  | -2.58272 | -0.16269 |
| H                              | 3.77821  | -3.5106  | -0.15329 |
| C                              | -1.28715 | 2.68391  | -2.48596 |
| H                              | -1.94161 | 3.54125  | -2.57363 |
| C                              | -0.52379 | 2.35146  | -1.30658 |
| C                              | -3.53867 | -1.38799 | 0.9575   |
| C                              | -2.65541 | -2.22509 | 0.29052  |
| C                              | -3.64031 | -3.75813 | 1.55121  |
| S                              | -4.51024 | -2.32489 | 2.05815  |
| H                              | -3.8785  | -4.72621 | 1.97757  |
| N                              | -2.72374 | -3.56268 | 0.65823  |
| C                              | -3.67918 | 0.1022   | 0.81737  |
| C                              | -4.71288 | 0.46779  | -0.2538  |
| H                              | -2.70441 | 0.52583  | 0.55433  |
| H                              | -3.97503 | 0.55475  | 1.76972  |
| H                              | -4.41593 | 0.10525  | -1.23926 |
| H                              | -5.70211 | 0.07516  | -0.01143 |
| Cl                             | -4.90083 | 2.27301  | -0.40212 |
| C                              | -1.66285 | -1.79777 | -0.68802 |
| H                              | -1.16785 | -2.62078 | -1.20116 |
| H                              | -1.95891 | -0.98993 | -1.35702 |
| H                              | -0.68846 | -1.1869  | -0.0193  |
| <sup>4</sup> TS-H <sub>A</sub> |          |          |          |
| Fe                             | -1.46633 | 0.06958  | 0.07144  |
| O                              | 0.19084  | -0.38446 | 0.12868  |
| S                              | -3.74791 | 0.73697  | -0.28555 |
| H                              | -3.61287 | 2.05135  | 0.00085  |
| N                              | -1.83763 | -0.94639 | 1.74551  |
| C                              | -2.3492  | -2.63703 | 3.2367   |
| C                              | -2.06936 | -1.52823 | 3.9709   |

|    |          |          |          |
|----|----------|----------|----------|
| H  | -2.63314 | -3.62288 | 3.58219  |
| H  | -2.07418 | -1.41107 | 5.04707  |
| N  | -1.13932 | 1.74644  | 1.14041  |
| C  | -1.15148 | 1.85676  | 2.50493  |
| C  | -0.78114 | 3.19297  | 2.90222  |
| C  | -0.52608 | 3.88487  | 1.75767  |
| H  | -0.72136 | 3.53663  | 3.92703  |
| H  | -0.21345 | 4.91536  | 1.64689  |
| N  | -1.16324 | 1.13715  | -1.65181 |
| C  | -0.7757  | 2.44906  | -1.75155 |
| C  | -1.27065 | 0.67174  | -2.93727 |
| C  | -0.62403 | 2.81957  | -3.13867 |
| C  | -0.93179 | 1.71635  | -3.87473 |
| H  | -0.32294 | 3.79988  | -3.48502 |
| H  | -0.93904 | 1.60441  | -4.95148 |
| N  | -2.00549 | -1.52598 | -1.03303 |
| C  | -2.3815  | -2.9589  | -2.80375 |
| H  | -2.45708 | -3.2953  | -3.82991 |
| C  | -1.99781 | -1.62707 | -2.40451 |
| C  | -2.21103 | -2.26209 | 1.84788  |
| C  | -1.75768 | -0.47505 | 3.03174  |
| C  | -0.74492 | 2.97247  | 0.66208  |
| C  | -1.6516  | -0.61651 | -3.29067 |
| H  | -1.68944 | -0.85163 | -4.35    |
| C  | -2.4611  | -3.11048 | 0.77972  |
| H  | -2.75735 | -4.12939 | 1.00926  |
| C  | -1.44707 | 0.82699  | 3.39151  |
| H  | -1.42208 | 1.05979  | 4.45168  |
| C  | -0.57102 | 3.30331  | -0.67607 |
| H  | -0.25114 | 4.31631  | -0.89921 |
| C  | -2.61117 | -3.66206 | -1.66112 |
| H  | -2.91376 | -4.69585 | -1.55385 |
| C  | -2.36573 | -2.76063 | -0.56216 |
| C  | 3.88808  | 0.17097  | 0.17997  |
| C  | 3.06613  | 0.80722  | -0.74261 |
| C  | 4.18365  | 2.58828  | -0.03943 |
| S  | 4.94223  | 1.33914  | 0.92634  |
| H  | 4.50297  | 3.62081  | 0.04858  |
| N  | 3.24627  | 2.18283  | -0.83449 |
| C  | 3.92633  | -1.29091 | 0.52668  |
| C  | 4.93511  | -2.04291 | -0.35008 |
| H  | 2.9267   | -1.71617 | 0.39093  |
| H  | 4.18938  | -1.43468 | 1.57996  |
| H  | 4.67533  | -1.97384 | -1.40785 |
| H  | 5.94983  | -1.66619 | -0.20804 |
| Cl | 4.97704  | -3.81301 | 0.06167  |

|                               |          |          |          |
|-------------------------------|----------|----------|----------|
| C                             | 2.0297   | 0.16487  | -1.53636 |
| H                             | 1.65392  | 0.77648  | -2.35418 |
| H                             | 2.21119  | -0.87275 | -1.81936 |
| H                             | 0.97964  | -0.02081 | -0.7177  |
| <sup>2</sup> INT <sub>A</sub> |          |          |          |
| Fe                            | -1.46196 | 0.09002  | -0.25416 |
| O                             | -0.0658  | 0.07565  | 0.93767  |
| S                             | -3.39028 | -0.06542 | -1.67079 |
| H                             | -2.98526 | -1.09425 | -2.44963 |
| N                             | -1.8481  | -1.85171 | 0.15634  |
| C                             | -1.80225 | -4.16406 | 0.18266  |
| C                             | -2.63781 | -3.76911 | 1.1797   |
| H                             | -1.52718 | -5.16925 | -0.10977 |
| H                             | -3.19585 | -4.38304 | 1.87507  |
| N                             | -2.76937 | 0.67603  | 1.18133  |
| C                             | -3.45474 | -0.14644 | 2.03693  |
| C                             | -4.29081 | 0.63183  | 2.92097  |
| C                             | -4.11354 | 1.93746  | 2.57949  |
| H                             | -4.93113 | 0.21692  | 3.68891  |
| H                             | -4.57569 | 2.8165   | 3.01025  |
| N                             | -1.1741  | 2.02846  | -0.73025 |
| C                             | -1.7675  | 3.13182  | -0.17593 |
| C                             | -0.3252  | 2.50116  | -1.69232 |
| C                             | -1.27967 | 4.33535  | -0.80423 |
| C                             | -0.37789 | 3.94283  | -1.74699 |
| H                             | -1.59393 | 5.33884  | -0.54723 |
| H                             | 0.19971  | 4.55789  | -2.42522 |
| N                             | -0.20433 | -0.499   | -1.71527 |
| C                             | 1.373    | -0.45724 | -3.40408 |
| H                             | 2.04949  | -0.04305 | -4.14086 |
| C                             | 0.53444  | 0.32234  | -2.5218  |
| C                             | -1.30465 | -2.95968 | -0.44148 |
| C                             | -2.65617 | -2.3237  | 1.16014  |
| C                             | -3.16223 | 1.95398  | 1.49398  |
| C                             | 0.48528  | 1.71371  | -2.50913 |
| H                             | 1.12075  | 2.23504  | -3.21902 |
| C                             | -0.37949 | -2.92845 | -1.47636 |
| H                             | -0.0143  | -3.88126 | -1.84651 |
| C                             | -3.38629 | -1.5367  | 2.04084  |
| H                             | -3.98111 | -2.05579 | 2.78679  |
| C                             | -2.70165 | 3.10052  | 0.85638  |
| H                             | -3.09518 | 4.05292  | 1.19931  |
| C                             | 1.12515  | -1.76584 | -3.11882 |
| H                             | 1.55619  | -2.65004 | -3.57063 |
| C                             | 0.14011  | -1.77605 | -2.06138 |
| C                             | 4.10589  | 0.33407  | 1.19314  |

|                               |          |          |          |
|-------------------------------|----------|----------|----------|
| C                             | 3.72657  | 1.61211  | 0.71842  |
| C                             | 5.87204  | 2.04092  | 1.12144  |
| S                             | 5.79779  | 0.34815  | 1.61333  |
| H                             | 6.80783  | 2.58532  | 1.19417  |
| N                             | 4.77201  | 2.55081  | 0.69471  |
| C                             | 3.28035  | -0.91405 | 1.31248  |
| C                             | 3.55924  | -1.86491 | 0.13706  |
| H                             | 2.21241  | -0.665   | 1.32941  |
| H                             | 3.51543  | -1.43416 | 2.24865  |
| H                             | 3.14535  | -1.4775  | -0.79527 |
| H                             | 4.62783  | -2.04982 | 0.01177  |
| Cl                            | 2.79976  | -3.49601 | 0.40756  |
| C                             | 2.44766  | 1.99363  | 0.31251  |
| H                             | 2.28874  | 3.01967  | 0.00183  |
| H                             | 1.60028  | 1.31551  | 0.35845  |
| H                             | -0.29496 | 0.72221  | 1.62749  |
| <sup>4</sup> INT <sub>A</sub> |          |          |          |
| Fe                            | -1.51374 | 0.02164  | -0.15021 |
| O                             | 0.17728  | 0.29349  | 0.46157  |
| S                             | -3.77143 | -0.47762 | -0.8627  |
| H                             | -3.4914  | -1.44799 | -1.76183 |
| N                             | -1.43162 | -1.94509 | 0.26166  |
| C                             | -1.02998 | -4.2224  | 0.14602  |
| C                             | -1.51578 | -3.96407 | 1.38884  |
| H                             | -0.72434 | -5.17128 | -0.27534 |
| H                             | -1.69696 | -4.65809 | 2.19951  |
| N                             | -2.35318 | 0.38976  | 1.65007  |
| C                             | -2.5525  | -0.52234 | 2.65259  |
| C                             | -3.16267 | 0.11143  | 3.79789  |
| C                             | -3.34516 | 1.41968  | 3.47102  |
| H                             | -3.42171 | -0.39579 | 4.71842  |
| H                             | -3.78095 | 2.21009  | 4.06856  |
| N                             | -1.72851 | 1.98149  | -0.60725 |
| C                             | -2.27567 | 2.97215  | 0.15891  |
| C                             | -1.32728 | 2.58299  | -1.76851 |
| C                             | -2.21668 | 4.23782  | -0.53033 |
| C                             | -1.62066 | 3.99553  | -1.73155 |
| H                             | -2.5832  | 5.17662  | -0.13539 |
| H                             | -1.39933 | 4.6947   | -2.52774 |
| N                             | -0.75867 | -0.36026 | -1.98656 |
| C                             | 0.12409  | -0.06429 | -4.10255 |
| H                             | 0.43849  | 0.45259  | -5.00025 |
| C                             | -0.47617 | 0.57025  | -2.95108 |
| C                             | -0.96584 | -2.95692 | -0.54657 |
| C                             | -1.75888 | -2.54128 | 1.45534  |
| C                             | -2.83359 | 1.58614  | 2.13198  |

|                                  |          |          |          |
|----------------------------------|----------|----------|----------|
| C                                | -0.74089 | 1.93159  | -2.85249 |
| H                                | -0.47337 | 2.54707  | -3.70669 |
| C                                | -0.46241 | -2.78066 | -1.82581 |
| H                                | -0.10105 | -3.66395 | -2.34322 |
| C                                | -2.25247 | -1.87945 | 2.57111  |
| H                                | -2.45908 | -2.48284 | 3.45021  |
| C                                | -2.80596 | 2.78692  | 1.43632  |
| H                                | -3.21583 | 3.66033  | 1.93497  |
| C                                | 0.19879  | -1.39333 | -3.81789 |
| H                                | 0.58812  | -2.19538 | -4.43167 |
| C                                | -0.3548  | -1.55974 | -2.49362 |
| C                                | 4.27445  | 0.54438  | 0.90545  |
| C                                | 3.9805   | 1.7831   | 0.29187  |
| C                                | 6.02516  | 2.26104  | 1.03266  |
| S                                | 5.87536  | 0.60222  | 1.60581  |
| H                                | 6.93074  | 2.82429  | 1.23333  |
| N                                | 5.01311  | 2.73105  | 0.39218  |
| C                                | 3.45377  | -0.71341 | 0.91936  |
| C                                | 3.85475  | -1.62258 | -0.25105 |
| H                                | 2.38671  | -0.47215 | 0.84211  |
| H                                | 3.59972  | -1.2587  | 1.85899  |
| H                                | 3.58469  | -1.1755  | -1.20899 |
| H                                | 4.92357  | -1.8442  | -0.24378 |
| Cl                               | 3.00774  | -3.23495 | -0.17231 |
| C                                | 2.79585  | 2.12507  | -0.3673  |
| H                                | 2.70906  | 3.11693  | -0.79557 |
| H                                | 1.95095  | 1.44652  | -0.42186 |
| H                                | 0.13161  | 1.0224   | 1.10432  |
| <sup>2</sup> TS-reb <sub>A</sub> |          |          |          |
| Fe                               | 1.41431  | 0.21435  | 0.34656  |
| S                                | 2.89215  | 0.94054  | 2.04272  |
| H                                | 4.006    | 1.05131  | 1.28492  |
| N                                | -0.00215 | 0.30014  | 1.77999  |
| C                                | -1.72158 | 1.02776  | 3.13007  |
| C                                | -1.46457 | -0.26712 | 3.46698  |
| H                                | -2.46237 | 1.69933  | 3.54478  |
| H                                | -1.94842 | -0.87727 | 4.21912  |
| N                                | 1.75358  | -1.73006 | 0.8004   |
| C                                | 1.13303  | -2.4632  | 1.78394  |
| C                                | 1.71123  | -3.78218 | 1.85041  |
| C                                | 2.70285  | -3.82818 | 0.91819  |
| H                                | 1.39582  | -4.55652 | 2.53809  |
| H                                | 3.36911  | -4.64805 | 0.68183  |
| N                                | 2.92605  | 0.1655   | -0.9829  |
| C                                | 3.72627  | -0.90948 | -1.28258 |
| C                                | 3.29543  | 1.17512  | -1.83758 |

|                                |          |          |          |
|--------------------------------|----------|----------|----------|
| C                              | 4.64978  | -0.55624 | -2.33147 |
| C                              | 4.38252  | 0.7344   | -2.67535 |
| H                              | 5.3921   | -1.22554 | -2.7474  |
| H                              | 4.86051  | 1.34375  | -3.43183 |
| N                              | 0.99936  | 2.11842  | -0.18588 |
| C                              | 1.05462  | 4.17832  | -1.21807 |
| H                              | 1.3764   | 4.95595  | -1.89911 |
| C                              | 1.63662  | 2.85866  | -1.14597 |
| C                              | -0.80898 | 1.37256  | 2.06805  |
| C                              | -0.39454 | -0.71767 | 2.61195  |
| C                              | 2.73551  | -2.53725 | 0.27713  |
| C                              | 2.70573  | 2.42909  | -1.91913 |
| H                              | 3.11348  | 3.12672  | -2.64377 |
| C                              | -0.79409 | 2.59991  | 1.4183   |
| H                              | -1.49902 | 3.35255  | 1.75604  |
| C                              | 0.12843  | -2.00429 | 2.62285  |
| H                              | -0.27408 | -2.70177 | 3.35047  |
| C                              | 3.65066  | -2.16655 | -0.69732 |
| H                              | 4.36363  | -2.91571 | -1.02633 |
| C                              | 0.07113  | 4.22621  | -0.27866 |
| H                              | -0.58395 | 5.05059  | -0.02728 |
| C                              | 0.05045  | 2.93602  | 0.36972  |
| C                              | -1.61202 | -0.27213 | -2.49189 |
| H                              | -0.9414  | -0.47713 | -3.31546 |
| H                              | -1.68073 | 0.74324  | -2.13164 |
| O                              | 0.18281  | -0.32002 | -0.93996 |
| H                              | 0.21499  | -1.29406 | -0.95094 |
| C                              | -3.34021 | -3.32696 | -2.16227 |
| C                              | -2.50442 | -1.27071 | -2.06785 |
| C                              | -3.46426 | -1.14711 | -1.04618 |
| S                              | -4.33338 | -2.64717 | -0.87609 |
| H                              | -3.4886  | -4.35399 | -2.47829 |
| N                              | -2.45993 | -2.53501 | -2.66902 |
| C                              | -3.75757 | 0.05618  | -0.19995 |
| H                              | -2.84959 | 0.66063  | -0.10916 |
| H                              | -4.0373  | -0.24046 | 0.81669  |
| C                              | -4.88274 | 0.90489  | -0.80575 |
| H                              | -4.61468 | 1.27531  | -1.79665 |
| H                              | -5.81796 | 0.34615  | -0.87432 |
| Cl                             | -5.23074 | 2.36736  | 0.21999  |
| <sup>2</sup> P-OH <sub>A</sub> |          |          |          |
| Fe                             | 1.60186  | 0.3812   | -0.15899 |
| O                              | -0.24572 | -0.63641 | 0.50609  |
| S                              | 3.56368  | 1.27353  | -0.74848 |
| H                              | 3.33222  | 2.53694  | -0.32427 |
| N                              | 1.65657  | 1.21949  | 1.66487  |



|   |          |          |          |
|---|----------|----------|----------|
| C | 1.45053  | 2.68651  | 3.43932  |
| C | 2.16751  | 1.61829  | 3.88226  |
| H | 1.1531   | 3.57359  | 3.98425  |
| H | 2.57937  | 1.44417  | 4.86836  |
| N | 2.49579  | -1.28809 | 0.54405  |
| C | 3.02724  | -1.44337 | 1.80138  |
| C | 3.68768  | -2.72242 | 1.90797  |
| C | 3.55584  | -3.33682 | 0.70035  |
| H | 4.18252  | -3.08725 | 2.79925  |
| H | 3.92142  | -4.30876 | 0.39401  |
| N | 1.38529  | -0.54084 | -1.94386 |
| C | 1.85005  | -1.78023 | -2.3152  |
| C | 0.85088  | 0.01715  | -3.08086 |
| C | 1.58351  | -2.0166  | -3.71325 |
| C | 0.96743  | -0.90021 | -4.18928 |
| H | 1.84726  | -2.92141 | -4.24618 |
| H | 0.61879  | -0.69891 | -5.19444 |
| N | 0.53464  | 1.95511  | -0.81896 |
| C | -0.53365 | 3.45062  | -2.22042 |
| H | -0.95394 | 3.85237  | -3.13391 |
| C | 0.11727  | 2.16719  | -2.11128 |
| C | 1.14023  | 2.43064  | 2.05265  |
| C | 2.28892  | 0.70594  | 2.76867  |
| C | 2.82055  | -2.43101 | -0.14821 |
| C | 0.26439  | 1.27349  | -3.16491 |
| H | -0.11678 | 1.58066  | -4.1342  |
| C | 0.43782  | 3.30165  | 1.22993  |
| H | 0.09301  | 4.23552  | 1.66342  |
| C | 2.93482  | -0.52198 | 2.83564  |
| H | 3.39685  | -0.78878 | 3.78135  |
| C | 2.50745  | -2.67377 | -1.47944 |
| H | 2.82379  | -3.62073 | -1.90574 |
| C | -0.50409 | 4.01472  | -0.98128 |
| H | -0.89312 | 4.97534  | -0.66791 |
| C | 0.17216  | 3.0801   | -0.11532 |
| C | -3.77985 | -1.33183 | 0.78935  |
| C | -2.49107 | -1.48034 | 0.34138  |
| C | -2.92772 | -3.62672 | 0.64995  |
| S | -4.44488 | -2.91586 | 1.12563  |
| H | -2.78004 | -4.70005 | 0.68202  |
| N | -2.02148 | -2.77726 | 0.27054  |
| C | -4.5922  | -0.0783  | 0.96633  |
| C | -5.47272 | 0.20458  | -0.25704 |
| H | -3.91917 | 0.77047  | 1.12724  |
| H | -5.22639 | -0.15028 | 1.85641  |
| H | -4.87126 | 0.35195  | -1.15589 |

|                                |          |          |          |
|--------------------------------|----------|----------|----------|
| H                              | -6.18552 | -0.60298 | -0.43474 |
| Cl                             | -6.4463  | 1.71761  | -0.02201 |
| C                              | -1.52984 | -0.404   | -0.08631 |
| H                              | -1.43451 | -0.38992 | -1.17961 |
| H                              | -1.84772 | 0.58648  | 0.24102  |
| H                              | -0.03087 | -1.57921 | 0.37366  |
| <sup>4</sup> P-OH <sub>A</sub> |          |          |          |
| Fe                             | 1.64647  | 0.35371  | -0.18659 |
| O                              | -0.30505 | -0.59601 | 0.57648  |
| S                              | 3.71206  | 1.14519  | -0.87968 |
| H                              | 3.35476  | 2.43226  | -1.09201 |
| N                              | 1.95672  | 0.80535  | 1.84256  |
| C                              | 2.14624  | 1.9558   | 3.82292  |
| C                              | 2.73329  | 0.73791  | 4.004    |
| H                              | 2.0495   | 2.76305  | 4.53837  |
| H                              | 3.21007  | 0.3532   | 4.89702  |
| N                              | 2.41039  | -1.51026 | 0.11482  |
| C                              | 3.03743  | -1.94587 | 1.25902  |
| C                              | 3.58545  | -3.26375 | 1.02468  |
| C                              | 3.28675  | -3.60225 | -0.2619  |
| H                              | 4.12504  | -3.84674 | 1.76056  |
| H                              | 3.5331   | -4.51702 | -0.78629 |
| N                              | 1.01373  | -0.24065 | -2.11636 |
| C                              | 1.34273  | -1.41034 | -2.74109 |
| C                              | 0.41603  | 0.56526  | -3.04518 |
| C                              | 0.89798  | -1.36334 | -4.11897 |
| C                              | 0.32367  | -0.13941 | -4.30763 |
| H                              | 1.02559  | -2.15859 | -4.84297 |
| H                              | -0.10901 | 0.2614   | -5.21599 |
| N                              | 0.70406  | 2.13211  | -0.44083 |
| C                              | -0.32021 | 3.95304  | -1.39994 |
| H                              | -0.80923 | 4.55987  | -2.15179 |
| C                              | 0.14358  | 2.5989   | -1.6074  |
| C                              | 1.66916  | 1.99021  | 2.45357  |
| C                              | 2.61466  | 0.02485  | 2.74641  |
| C                              | 2.55145  | -2.49635 | -0.83456 |
| C                              | 0.00487  | 1.87942  | -2.79936 |
| H                              | -0.46055 | 2.40849  | -3.62655 |
| C                              | 1.04374  | 3.06961  | 1.8227   |
| H                              | 0.88267  | 3.96063  | 2.42334  |
| C                              | 3.11694  | -1.25043 | 2.4698   |
| H                              | 3.637    | -1.75635 | 3.27857  |
| C                              | 2.04786  | -2.4574  | -2.13842 |
| H                              | 2.24643  | -3.32983 | -2.75469 |
| C                              | -0.03252 | 4.28369  | -0.10846 |
| H                              | -0.23931 | 5.21486  | 0.40415  |

|                              |          |          |          |
|------------------------------|----------|----------|----------|
| C                            | 0.61297  | 3.13756  | 0.49328  |
| C                            | -3.86348 | -1.243   | 0.86625  |
| C                            | -2.57009 | -1.39891 | 0.43454  |
| C                            | -3.0281  | -3.54365 | 0.72631  |
| S                            | -4.54535 | -2.82338 | 1.18647  |
| H                            | -2.88895 | -4.61821 | 0.75483  |
| N                            | -2.11051 | -2.69924 | 0.36291  |
| C                            | -4.66838 | 0.01626  | 1.03546  |
| C                            | -5.52379 | 0.31194  | -0.20253 |
| H                            | -3.99096 | 0.85848  | 1.2122   |
| H                            | -5.31934 | -0.05409 | 1.91349  |
| H                            | -4.90477 | 0.45524  | -1.09003 |
| H                            | -6.24168 | -0.48758 | -0.39533 |
| Cl                           | -6.48589 | 1.83472  | 0.01876  |
| C                            | -1.59461 | -0.32788 | 0.02148  |
| H                            | -1.52308 | -0.28102 | -1.07323 |
| H                            | -1.89211 | 0.65746  | 0.38456  |
| H                            | -0.12257 | -1.54548 | 0.44213  |
| <sup>2</sup> RC <sub>B</sub> |          |          |          |
| Fe                           | 1.22808  | 0.1238   | -0.27476 |
| O                            | 0.31429  | -0.11118 | 1.05095  |
| S                            | 2.98379  | 0.46726  | -2.12208 |
| H                            | 3.00002  | 1.81959  | -2.11096 |
| N                            | 2.75168  | 0.96918  | 0.75604  |
| C                            | 4.03119  | 2.48264  | 1.95075  |
| C                            | 4.57431  | 1.2523   | 2.15184  |
| H                            | 4.35711  | 3.4367   | 2.34485  |
| H                            | 5.44068  | 0.98609  | 2.74362  |
| N                            | 2.15278  | -1.66556 | -0.12896 |
| C                            | 3.24282  | -1.97046 | 0.64322  |
| C                            | 3.52884  | -3.38377 | 0.57415  |
| C                            | 2.59887  | -3.93127 | -0.25305 |
| H                            | 4.34305  | -3.87304 | 1.093    |
| H                            | 2.48587  | -4.96491 | -0.55337 |
| N                            | -0.10646 | -0.67339 | -1.55241 |
| C                            | -0.2143  | -1.98761 | -1.91762 |
| C                            | -1.15121 | -0.02703 | -2.15829 |
| C                            | -1.35509 | -2.17943 | -2.77947 |
| C                            | -1.94013 | -0.95797 | -2.92774 |
| H                            | -1.65085 | -3.12779 | -3.20935 |
| H                            | -2.81308 | -0.69229 | -3.51012 |
| N                            | 0.48109  | 1.9607   | -0.64529 |
| C                            | -0.93261 | 3.66816  | -1.29961 |
| H                            | -1.76557 | 4.15187  | -1.79325 |
| C                            | -0.64916 | 2.25515  | -1.36496 |
| C                            | 2.88619  | 2.2987   | 1.09272  |

|                              |          |          |          |
|------------------------------|----------|----------|----------|
| C                            | 3.7682   | 0.31207  | 1.41208  |
| C                            | 1.73959  | -2.8536  | -0.68084 |
| C                            | -1.41402 | 1.33489  | -2.06818 |
| H                            | -2.29231 | 1.70897  | -2.58441 |
| C                            | 2.03266  | 3.3117   | 0.68914  |
| H                            | 2.25361  | 4.31665  | 1.03596  |
| C                            | 3.98806  | -1.0551  | 1.37646  |
| H                            | 4.82509  | -1.44052 | 1.95042  |
| C                            | 0.64634  | -3.00651 | -1.51885 |
| H                            | 0.43461  | -4.00683 | -1.88365 |
| C                            | 0.03865  | 4.2249   | -0.52496 |
| H                            | 0.16999  | 5.26288  | -0.24701 |
| C                            | 0.91031  | 3.14909  | -0.11884 |
| C                            | -3.8701  | 0.09246  | 1.3282   |
| C                            | -4.60673 | 0.44293  | 0.21988  |
| C                            | -3.86806 | 2.46217  | 0.73945  |
| S                            | -3.12243 | 1.52136  | 1.99645  |
| H                            | -3.71693 | 3.5343   | 0.68562  |
| N                            | -4.59547 | 1.78796  | -0.1027  |
| C                            | -3.6346  | -1.27308 | 1.91692  |
| C                            | -2.4745  | -1.98841 | 1.21616  |
| H                            | -4.54395 | -1.87697 | 1.81908  |
| H                            | -3.41887 | -1.20212 | 2.98799  |
| H                            | -2.67798 | -2.13112 | 0.15369  |
| H                            | -1.53002 | -1.45343 | 1.33104  |
| Cl                           | -2.23224 | -3.6559  | 1.91638  |
| C                            | -5.39941 | -0.4914  | -0.65084 |
| H                            | -4.88462 | -0.67451 | -1.6027  |
| H                            | -5.56196 | -1.46019 | -0.1696  |
| H                            | -6.37409 | -0.05162 | -0.88618 |
| <sup>4</sup> RC <sub>B</sub> |          |          |          |
| Fe                           | 1.24492  | -0.12159 | 0.26612  |
| O                            | 0.29899  | 0.11713  | -1.0384  |
| S                            | 2.9719   | -0.4604  | 2.12575  |
| H                            | 2.98297  | -1.8128  | 2.12398  |
| N                            | 2.76184  | -0.97035 | -0.75959 |
| C                            | 4.0516   | -2.49172 | -1.93347 |
| C                            | 4.59962  | -1.26349 | -2.13373 |
| H                            | 4.37961  | -3.44814 | -2.32003 |
| H                            | 5.47279  | -1.00151 | -2.71732 |
| N                            | 2.16859  | 1.66576  | 0.11715  |
| C                            | 3.26376  | 1.96745  | -0.64867 |
| C                            | 3.55315  | 3.37991  | -0.57958 |
| C                            | 2.62036  | 3.93041  | 0.24245  |
| H                            | 4.37145  | 3.86655  | -1.09442 |
| H                            | 2.50881  | 4.96454  | 0.5417   |

|                                |          |          |          |
|--------------------------------|----------|----------|----------|
| N                              | -0.09436 | 0.68223  | 1.54296  |
| C                              | -0.20394 | 1.99762  | 1.90042  |
| C                              | -1.14085 | 0.03859  | 2.14756  |
| C                              | -1.34859 | 2.19418  | 2.75658  |
| C                              | -1.93349 | 0.97327  | 2.90926  |
| H                              | -1.64662 | 3.14486  | 3.17971  |
| H                              | -2.80883 | 0.7103   | 3.48928  |
| N                              | 0.49045  | -1.95702 | 0.63929  |
| C                              | -0.92892 | -3.65903 | 1.29588  |
| H                              | -1.76341 | -4.13937 | 1.79024  |
| C                              | -0.64069 | -2.24676 | 1.35993  |
| C                              | 2.89839  | -2.30235 | -1.08805 |
| C                              | 3.7881   | -0.31849 | -1.40653 |
| C                              | 1.75609  | 2.85559  | 0.66716  |
| C                              | -1.40337 | -1.32382 | 2.06196  |
| H                              | -2.28229 | -1.6959  | 2.57866  |
| C                              | 2.04036  | -3.31314 | -0.68908 |
| H                              | 2.26188  | -4.31894 | -1.033   |
| C                              | 4.01093  | 1.04815  | -1.3751  |
| H                              | 4.85342  | 1.42918  | -1.94396 |
| C                              | 0.6603   | 3.01336  | 1.50076  |
| H                              | 0.44981  | 4.0154   | 1.86159  |
| C                              | 0.03995  | -4.21985 | 0.52124  |
| H                              | 0.16767  | -5.25851 | 0.24417  |
| C                              | 0.91539  | -3.14726 | 0.11466  |
| C                              | -3.89661 | -0.10071 | -1.31446 |
| C                              | -4.62606 | -0.45167 | -0.20158 |
| C                              | -3.88565 | -2.46981 | -0.72309 |
| S                              | -3.14957 | -1.52865 | -1.98553 |
| H                              | -3.73178 | -3.54155 | -0.66902 |
| N                              | -4.60979 | -1.79634 | 0.12241  |
| C                              | -3.66753 | 1.26463  | -1.9062  |
| C                              | -2.50506 | 1.98361  | -1.21309 |
| H                              | -4.57766 | 1.86661  | -1.80398 |
| H                              | -3.45784 | 1.19273  | -2.9784  |
| H                              | -2.70304 | 2.12815  | -0.14983 |
| H                              | -1.56016 | 1.45031  | -1.33154 |
| Cl                             | -2.26977 | 3.64999  | -1.91827 |
| C                              | -5.41638 | 0.48159  | 0.67241  |
| H                              | -4.89881 | 0.66397  | 1.62289  |
| H                              | -5.58077 | 1.45074  | 0.19255  |
| H                              | -6.39018 | 0.04128  | 0.91045  |
| <sup>2</sup> TS-H <sub>B</sub> |          |          |          |
| Fe                             | 0.99991  | -0.25821 | 0.42754  |
| O                              | 0.10988  | -0.02834 | -1.06682 |
| S                              | 2.60635  | -0.66761 | 2.23012  |

|   |          |          |          |
|---|----------|----------|----------|
| H | 2.73976  | -2.00381 | 2.0721   |
| N | 2.50145  | -1.04072 | -0.69691 |
| C | 3.79906  | -2.46436 | -1.97794 |
| C | 4.32366  | -1.21688 | -2.10874 |
| H | 4.13713  | -3.38919 | -2.42773 |
| H | 5.18439  | -0.90439 | -2.68612 |
| N | 1.88466  | 1.54931  | 0.3794   |
| C | 2.98519  | 1.89424  | -0.36307 |
| C | 3.30687  | 3.28766  | -0.16324 |
| C | 2.39603  | 3.77949  | 0.71912  |
| H | 4.13131  | 3.80339  | -0.63863 |
| H | 2.31301  | 4.78352  | 1.11478  |
| N | -0.40016 | 0.48733  | 1.65814  |
| C | -0.49152 | 1.7596   | 2.15783  |
| C | -1.46245 | -0.19959 | 2.18706  |
| C | -1.65178 | 1.88808  | 3.00637  |
| C | -2.26055 | 0.66928  | 3.01876  |
| H | -1.94317 | 2.79396  | 3.52254  |
| H | -3.15478 | 0.36592  | 3.5479   |
| N | 0.22712  | -2.11618 | 0.62346  |
| C | -1.21026 | -3.85168 | 1.13304  |
| H | -2.06114 | -4.36072 | 1.56763  |
| C | -0.92556 | -2.44408 | 1.28498  |
| C | 2.65316  | -2.34329 | -1.10564 |
| C | 3.50529  | -0.33404 | -1.30802 |
| C | 1.5072   | 2.69094  | 1.04491  |
| C | -1.71583 | -1.55511 | 2.00553  |
| H | -2.60488 | -1.95701 | 2.48187  |
| C | 1.80845  | -3.38554 | -0.75366 |
| H | 2.03999  | -4.3698  | -1.15008 |
| C | 3.7184   | 1.03073  | -1.16953 |
| H | 4.55722  | 1.45734  | -1.71154 |
| C | 0.40693  | 2.78887  | 1.88474  |
| H | 0.21974  | 3.75104  | 2.35212  |
| C | -0.21418 | -4.36831 | 0.36198  |
| H | -0.0783  | -5.38929 | 0.02862  |
| C | 0.67144  | -3.27274 | 0.0445   |
| C | -3.28533 | 0.3374   | -1.62428 |
| C | -4.28882 | 0.46754  | -0.69132 |
| C | -4.30144 | -1.73733 | -0.84743 |
| S | -3.0331  | -1.3518  | -1.96975 |
| H | -4.59115 | -2.7669  | -0.66836 |
| N | -4.85403 | -0.71668 | -0.25765 |
| C | -2.47294 | 1.41624  | -2.28913 |
| C | -1.38375 | 1.97846  | -1.39313 |
| H | -3.14239 | 2.23852  | -2.58574 |

|                                |          |          |          |
|--------------------------------|----------|----------|----------|
| H                              | -2.01723 | 1.04787  | -3.21439 |
| H                              | -1.68997 | 2.26741  | -0.38841 |
| H                              | -0.48191 | 0.93372  | -1.15594 |
| Cl                             | -0.46972 | 3.30008  | -2.1476  |
| C                              | -4.80267 | 1.75766  | -0.11557 |
| H                              | -5.8944  | 1.72744  | -0.04073 |
| H                              | -4.40805 | 1.91995  | 0.8956   |
| H                              | -4.51959 | 2.61965  | -0.72758 |
| <sup>4</sup> TS-H <sub>B</sub> |          |          |          |
| Fe                             | 1.05487  | -0.29701 | 0.38144  |
| O                              | 0.10737  | -0.00508 | -1.05133 |
| S                              | 2.31193  | -0.49457 | 2.44924  |
| H                              | 3.52815  | -0.17877 | 1.94951  |
| N                              | 2.62649  | -0.84782 | -0.7174  |
| C                              | 4.11239  | -2.08129 | -1.98622 |
| C                              | 4.50874  | -0.7818  | -2.05613 |
| H                              | 4.55993  | -2.94979 | -2.45232 |
| H                              | 5.35207  | -0.36094 | -2.58868 |
| N                              | 1.75977  | 1.60921  | 0.46739  |
| C                              | 2.84167  | 2.10025  | -0.21541 |
| C                              | 3.01399  | 3.50642  | 0.0637   |
| C                              | 2.02156  | 3.86062  | 0.92394  |
| H                              | 3.79782  | 4.12554  | -0.35363 |
| H                              | 1.81902  | 4.83176  | 1.35688  |
| N                              | -0.4502  | 0.25966  | 1.63843  |
| C                              | -0.6874  | 1.5008   | 2.17197  |
| C                              | -1.46585 | -0.54492 | 2.08362  |
| C                              | -1.88781 | 1.4793   | 2.97283  |
| C                              | -2.37486 | 0.20817  | 2.91376  |
| H                              | -2.28834 | 2.33131  | 3.50736  |
| H                              | -3.25989 | -0.19892 | 3.38533  |
| N                              | 0.43264  | -2.20062 | 0.45407  |
| C                              | -0.8297  | -4.09154 | 0.85937  |
| H                              | -1.63822 | -4.69942 | 1.24524  |
| C                              | -0.70001 | -2.66759 | 1.0672   |
| C                              | 2.9324   | -2.11115 | -1.15523 |
| C                              | 3.57851  | -0.01914 | -1.25686 |
| C                              | 1.23582  | 2.67495  | 1.16557  |
| C                              | -1.59007 | -1.90306 | 1.81171  |
| H                              | -2.44832 | -2.41451 | 2.23634  |
| C                              | 2.19947  | -3.25492 | -0.86946 |
| H                              | 2.55851  | -4.19379 | -1.28002 |
| C                              | 3.67411  | 1.34951  | -1.03788 |
| H                              | 4.49002  | 1.87306  | -1.52707 |
| C                              | 0.09798  | 2.62945  | 1.9565   |
| H                              | -0.2087  | 3.55078  | 2.44232  |

|                               |          |          |          |
|-------------------------------|----------|----------|----------|
| C                             | 0.24465  | -4.47821 | 0.1198   |
| H                             | 0.50133  | -5.46884 | -0.23315 |
| C                             | 1.02376  | -3.28797 | -0.12906 |
| C                             | -3.3227  | 0.31389  | -1.60243 |
| C                             | -4.33217 | 0.4231   | -0.67323 |
| C                             | -4.31796 | -1.78031 | -0.84964 |
| S                             | -3.04935 | -1.36915 | -1.96326 |
| H                             | -4.59716 | -2.81476 | -0.68213 |
| N                             | -4.88536 | -0.77187 | -0.25358 |
| C                             | -2.5232  | 1.40816  | -2.25787 |
| C                             | -1.44204 | 1.9812   | -1.35862 |
| H                             | -3.20414 | 2.22249  | -2.55059 |
| H                             | -2.06248 | 1.05194  | -3.18554 |
| H                             | -1.75    | 2.26042  | -0.3514  |
| H                             | -0.51302 | 0.94171  | -1.12067 |
| Cl                            | -0.54976 | 3.31995  | -2.109   |
| C                             | -4.86647 | 1.7009   | -0.08916 |
| H                             | -5.9596  | 1.66443  | -0.0405  |
| H                             | -4.4968  | 1.84648  | 0.9337   |
| H                             | -4.57336 | 2.57434  | -0.67966 |
| <sup>2</sup> INT <sub>B</sub> |          |          |          |
| Fe                            | 1.42235  | -0.37944 | -0.13454 |
| O                             | -0.07392 | 0.55811  | 0.26364  |
| S                             | 3.40379  | -1.49452 | -0.97785 |
| H                             | 2.80233  | -2.56237 | -1.54946 |
| N                             | 0.8888   | -0.43363 | -2.08926 |
| C                             | -0.10241 | -1.00066 | -4.10175 |
| C                             | 0.55046  | 0.17669  | -4.29416 |
| H                             | -0.6804  | -1.57565 | -4.81385 |
| H                             | 0.622    | 0.76755  | -5.19838 |
| N                             | 2.49048  | 1.31314  | -0.45697 |
| C                             | 2.54576  | 2.027    | -1.62587 |
| C                             | 3.3887   | 3.18879  | -1.46553 |
| C                             | 3.85432  | 3.16278  | -0.18704 |
| H                             | 3.59417  | 3.91366  | -2.24278 |
| H                             | 4.51784  | 3.86296  | 0.30406  |
| N                             | 2.07523  | -0.388   | 1.76698  |
| C                             | 2.9144   | 0.50507  | 2.37718  |
| C                             | 1.73811  | -1.30287 | 2.72758  |
| C                             | 3.11194  | 0.14886  | 3.7611   |
| C                             | 2.376    | -0.97595 | 3.9804   |
| H                             | 3.73232  | 0.69679  | 4.45865  |
| H                             | 2.26875  | -1.54426 | 4.89545  |
| N                             | 0.43668  | -2.11332 | 0.14931  |
| C                             | -0.51492 | -3.95631 | 1.1702   |
| H                             | -0.76158 | -4.65624 | 1.95831  |



|                               |          |          |          |
|-------------------------------|----------|----------|----------|
| C                             | 0.31589  | -2.78551 | 1.33579  |
| C                             | 0.10167  | -1.36711 | -2.71965 |
| C                             | 1.1616   | 0.52724  | -3.03249 |
| C                             | 3.28503  | 1.99174  | 0.43519  |
| C                             | 0.91775  | -2.41114 | 2.53181  |
| H                             | 0.74027  | -3.0483  | 3.39338  |
| C                             | -0.44749 | -2.48257 | -2.10337 |
| H                             | -1.0606  | -3.13769 | -2.71522 |
| C                             | 1.91056  | 1.6754   | -2.81343 |
| H                             | 2.03763  | 2.3482   | -3.65647 |
| C                             | 3.49117  | 1.61076  | 1.75505  |
| H                             | 4.14274  | 2.23613  | 2.35816  |
| C                             | -0.89478 | -3.98073 | -0.13652 |
| H                             | -1.51883 | -4.704   | -0.64566 |
| C                             | -0.29561 | -2.82314 | -0.76008 |
| C                             | -4.08852 | 0.66126  | 0.14315  |
| C                             | -5.44915 | 0.75125  | -0.03059 |
| C                             | -5.35353 | -1.40284 | 0.45977  |
| S                             | -3.66666 | -0.98275 | 0.56302  |
| H                             | -5.68637 | -2.41834 | 0.64532  |
| N                             | -6.15285 | -0.427   | 0.14602  |
| C                             | -3.04014 | 1.73819  | 0.04733  |
| C                             | -2.95935 | 2.53858  | 1.31073  |
| H                             | -3.26829 | 2.4061   | -0.79599 |
| H                             | -2.05484 | 1.29171  | -0.17004 |
| H                             | -3.20805 | 2.1244   | 2.28111  |
| H                             | 0.20722  | 1.36164  | 0.73526  |
| Cl                            | -1.84114 | 3.87347  | 1.37484  |
| C                             | -6.21672 | 1.99172  | -0.3906  |
| H                             | -6.95373 | 2.22592  | 0.38656  |
| H                             | -5.55954 | 2.85723  | -0.50645 |
| H                             | -6.77055 | 1.84502  | -1.3255  |
| <sup>4</sup> INT <sub>B</sub> |          |          |          |
| Fe                            | -1.48278 | -0.27241 | 0.31886  |
| O                             | -0.05299 | 0.28191  | -0.61693 |
| S                             | -3.37224 | -1.00093 | 1.42656  |
| H                             | -3.07525 | -0.51458 | 2.65205  |
| N                             | -0.77059 | 0.51887  | 2.0287   |
| C                             | 0.42747  | 0.83017  | 3.97249  |
| C                             | -0.22054 | 1.99854  | 3.70828  |
| H                             | 1.08661  | 0.59551  | 4.79852  |
| H                             | -0.20398 | 2.92231  | 4.27241  |
| N                             | -2.40517 | 1.48942  | -0.10314 |
| C                             | -2.38495 | 2.63149  | 0.66005  |
| C                             | -3.21293 | 3.64281  | 0.05216  |
| C                             | -3.75339 | 3.09039  | -1.06897 |

|                                  |            |            |            |
|----------------------------------|------------|------------|------------|
| H                                | -3.3587    | 4.63831    | 0.45158    |
| H                                | -4.4348    | 3.53839    | -1.78082   |
| N                                | -2.34684   | -1.1042    | -1.29551   |
| C                                | -3.19306   | -0.49139   | -2.18748   |
| C                                | -2.13804   | -2.37527   | -1.76823   |
| C                                | -3.54857   | -1.41338   | -3.23663   |
| C                                | -2.89499   | -2.57935   | -2.97736   |
| H                                | -4.20648   | -1.17731   | -4.06318   |
| H                                | -2.90487   | -3.49997   | -3.54663   |
| N                                | -0.50314   | -1.98269   | 0.69314    |
| C                                | 0.30209    | -4.1369    | 0.53906    |
| H                                | 0.44804    | -5.13141   | 0.13729    |
| C                                | -0.54279   | -3.13027   | -0.05679   |
| C                                | 0.09066    | -0.08491   | 2.91152    |
| C                                | -0.95565   | 1.80262    | 2.48432    |
| C                                | -3.25781   | 1.7394     | -1.15117   |
| C                                | -1.30102   | -3.3247    | -1.2003    |
| H                                | -1.23551   | -4.29152   | -1.68863   |
| C                                | 0.6002     | -1.37053   | 2.79738    |
| H                                | 1.27278    | -1.71461   | 3.5763     |
| C                                | -1.70686   | 2.78806    | 1.85993    |
| H                                | -1.77089   | 3.75423    | 2.34994    |
| C                                | -3.62381   | 0.82604    | -2.12856   |
| H                                | -4.30171   | 1.16617    | -2.90462   |
| C                                | 0.8368     | -3.58803   | 1.66322    |
| H                                | 1.51441    | -4.03663   | 2.37826    |
| C                                | 0.31994    | -2.24403   | 1.75835    |
| C                                | 4.23063    | 0.33479    | -0.54539   |
| C                                | 5.56928    | 0.6084     | -0.39466   |
| C                                | 5.73504    | -1.58925   | -0.58556   |
| S                                | 4.0107     | -1.389     | -0.73359   |
| H                                | 6.18635    | -2.57426   | -0.63228   |
| N                                | 6.40855    | -0.49133   | -0.41438   |
| C                                | 3.06351    | 1.28587    | -0.58827   |
| C                                | 2.92964    | 1.93788    | -1.92995   |
| H                                | 3.18567    | 2.05972    | 0.18371    |
| H                                | 2.12563    | 0.76277    | -0.33889   |
| H                                | 3.25378    | 1.46104    | -2.84777   |
| H                                | -0.26096   | 1.14835    | -1.01404   |
| Cl                               | 1.67       | 3.12092    | -2.14947   |
| C                                | 6.18128    | 1.96823    | -0.21196   |
| H                                | 6.87826    | 2.1886     | -1.02911   |
| H                                | 5.42395    | 2.75592    | -0.19113   |
| H                                | 6.75573    | 2.00926    | 0.72091    |
| <sup>2</sup> TS-reb <sub>B</sub> |            |            |            |
| Fe                               | 1.27042981 | 0.26638484 | 0.38982073 |

|   |             |             |             |
|---|-------------|-------------|-------------|
| O | -0.14928419 | -0.33989416 | -0.64947627 |
| S | 3.19638957  | 0.99678845  | 1.67888579  |
| H | 2.60186057  | 1.97045145  | 2.40403679  |
| N | 0.59562200  | -0.93994100 | 1.80845200  |
| C | -0.45559900 | -1.80466400 | 3.66844800  |
| C | 0.34376400  | -2.78500800 | 3.16577800  |
| H | -1.10026900 | -1.83789200 | 4.53754700  |
| H | 0.49088200  | -3.79194700 | 3.53502000  |
| N | 2.44146100  | -1.12553400 | -0.36610600 |
| C | 2.59296700  | -2.39361500 | 0.13387100  |
| C | 3.51824300  | -3.13639500 | -0.68529000 |
| C | 3.90698700  | -2.30768800 | -1.69319300 |
| H | 3.81221000  | -4.16224000 | -0.50359400 |
| H | 4.58685500  | -2.51140500 | -2.51058300 |
| N | 1.77023100  | 1.53452400  | -1.16497700 |
| C | 2.66228800  | 1.24497100  | -2.17072100 |
| C | 1.42073400  | 2.85411500  | -1.32572900 |
| C | 2.84249400  | 2.40064200  | -3.01299500 |
| C | 2.07575200  | 3.39700600  | -2.48922200 |
| H | 3.48843200  | 2.43229100  | -3.88115700 |
| H | 1.96133700  | 4.41499300  | -2.83931700 |
| N | 0.13307400  | 1.79847000  | 1.15650100  |
| C | -0.91718000 | 3.82114500  | 1.49922400  |
| H | -1.19488200 | 4.85413000  | 1.33220400  |
| C | -0.01148400 | 3.07340900  | 0.66427700  |
| C | -0.28115200 | -0.64899400 | 2.82095200  |
| C | 1.00545100  | -2.23268500 | 2.00807000  |
| C | 3.22211000  | -1.05472900 | -1.49147100 |
| C | 0.58855500  | 3.57556100  | -0.48275700 |
| H | 0.39060500  | 4.61140000  | -0.73908200 |
| C | -0.88498600 | 0.58152700  | 3.03633900  |
| H | -1.56060100 | 0.66903900  | 3.88110100  |
| C | 1.93498100  | -2.91577100 | 1.23836700  |
| H | 2.16096900  | -3.93993200 | 1.51712300  |
| C | 3.33119900  | 0.04140700  | -2.33679200 |
| H | 4.00127700  | -0.04629000 | -3.18591000 |
| C | -1.33483300 | 2.97821000  | 2.48471400  |
| H | -2.02751700 | 3.17587600  | 3.29276100  |
| C | -0.68431700 | 1.71295600  | 2.25799900  |
| C | -3.75742136 | -0.61176000 | -0.72006187 |
| C | -5.11172236 | -0.61588400 | -0.96113287 |
| C | -4.82098536 | 1.57536200  | -0.91442487 |
| S | -3.18986336 | 1.04170400  | -0.62501487 |
| H | -5.05864936 | 2.63280800  | -0.96119887 |
| N | -5.70172136 | 0.63241400  | -1.06580887 |
| C | -2.81865936 | -1.77507300 | -0.55389187 |

|    |             |             |             |
|----|-------------|-------------|-------------|
| C  | -1.82174536 | -1.87659200 | -1.66595387 |
| H  | -3.41159536 | -2.70030700 | -0.50546487 |
| H  | -2.27629136 | -1.71263800 | 0.39940013  |
| H  | -1.94409536 | -1.34381700 | -2.60129387 |
| H  | -0.09370919 | 0.18218184  | -1.47046527 |
| Cl | -0.85719236 | -3.30416500 | -1.78190487 |
| C  | -6.00469036 | -1.81528200 | -1.11679187 |
| H  | -6.49426436 | -1.80039000 | -2.09750887 |
| H  | -5.46026836 | -2.75807900 | -1.02196087 |
| H  | -6.79897036 | -1.80002800 | -0.36138287 |

<sup>4</sup>TS-reb<sub>B</sub>

|    |          |          |          |
|----|----------|----------|----------|
| Fe | 1.22545  | 0.31151  | 0.35737  |
| O  | -0.19426 | -0.29477 | -0.68193 |
| S  | 3.10032  | 0.95628  | 1.62966  |
| H  | 2.50579  | 1.92994  | 2.35481  |
| N  | 0.59562  | -0.93994 | 1.80845  |
| C  | -0.4556  | -1.80466 | 3.66845  |
| C  | 0.34376  | -2.78501 | 3.16578  |
| H  | -1.10027 | -1.83789 | 4.53755  |
| H  | 0.49088  | -3.79195 | 3.53502  |
| N  | 2.44146  | -1.12553 | -0.36611 |
| C  | 2.59297  | -2.39362 | 0.13387  |
| C  | 3.51824  | -3.1364  | -0.68529 |
| C  | 3.90699  | -2.30769 | -1.69319 |
| H  | 3.81221  | -4.16224 | -0.50359 |
| H  | 4.58685  | -2.51141 | -2.51058 |
| N  | 1.77023  | 1.53452  | -1.16498 |
| C  | 2.66229  | 1.24497  | -2.17072 |
| C  | 1.42073  | 2.85412  | -1.32573 |
| C  | 2.84249  | 2.40064  | -3.013   |
| C  | 2.07575  | 3.39701  | -2.48922 |
| H  | 3.48843  | 2.43229  | -3.88116 |
| H  | 1.96134  | 4.41499  | -2.83932 |
| N  | 0.13307  | 1.79847  | 1.1565   |
| C  | -0.91718 | 3.82115  | 1.49922  |
| H  | -1.19488 | 4.85413  | 1.3322   |
| C  | -0.01148 | 3.07341  | 0.66428  |
| C  | -0.28115 | -0.64899 | 2.82095  |
| C  | 1.00545  | -2.23269 | 2.00807  |
| C  | 3.22211  | -1.05473 | -1.49147 |
| C  | 0.58856  | 3.57556  | -0.48276 |
| H  | 0.39061  | 4.6114   | -0.73908 |
| C  | -0.88499 | 0.58153  | 3.03634  |
| H  | -1.5606  | 0.66904  | 3.8811   |
| C  | 1.93498  | -2.91577 | 1.23837  |
| H  | 2.16097  | -3.93993 | 1.51712  |

|                                |          |          |          |
|--------------------------------|----------|----------|----------|
| C                              | 3.3312   | 0.04141  | -2.33679 |
| H                              | 4.00128  | -0.04629 | -3.18591 |
| C                              | -1.33483 | 2.97821  | 2.48471  |
| H                              | -2.02752 | 3.17588  | 3.29276  |
| C                              | -0.68432 | 1.71296  | 2.258    |
| C                              | -3.73513 | -0.6006  | -0.70173 |
| C                              | -5.08943 | -0.60472 | -0.9428  |
| C                              | -4.7987  | 1.58653  | -0.8961  |
| S                              | -3.16758 | 1.05287  | -0.60669 |
| H                              | -5.03636 | 2.64397  | -0.94287 |
| N                              | -5.67943 | 0.64358  | -1.04748 |
| C                              | -2.79637 | -1.76391 | -0.53556 |
| C                              | -1.79946 | -1.86543 | -1.64763 |
| H                              | -3.38931 | -2.68914 | -0.48714 |
| H                              | -2.254   | -1.70147 | 0.41773  |
| H                              | -1.92181 | -1.33265 | -2.58297 |
| H                              | -0.13869 | 0.22731  | -1.50292 |
| Cl                             | -0.83491 | -3.293   | -1.76358 |
| C                              | -5.9824  | -1.80412 | -1.09846 |
| H                              | -6.47198 | -1.78923 | -2.07918 |
| H                              | -5.43798 | -2.74692 | -1.00363 |
| H                              | -6.77668 | -1.78886 | -0.34305 |
| <sup>2</sup> P-OH <sub>B</sub> |          |          |          |
| Fe                             | 1.68514  | 0.20238  | -0.41049 |
| O                              | -1.44318 | -0.90051 | 1.00319  |
| S                              | 3.13765  | 0.45497  | -2.07444 |
| H                              | 3.24883  | 1.80235  | -2.01689 |
| N                              | 2.63077  | 1.36677  | 0.90738  |
| C                              | 3.45424  | 3.21051  | 2.04508  |
| C                              | 4.22028  | 2.14408  | 2.40241  |
| H                              | 3.53092  | 4.23854  | 2.37537  |
| H                              | 5.05549  | 2.11349  | 3.09042  |
| N                              | 2.58232  | -1.41522 | 0.36208  |
| C                              | 3.6515   | -1.41261 | 1.22922  |
| C                              | 4.11967  | -2.75656 | 1.46174  |
| C                              | 3.32528  | -3.58126 | 0.72856  |
| H                              | 4.94397  | -3.01623 | 2.11361  |
| H                              | 3.36039  | -4.66014 | 0.64935  |
| N                              | 0.44129  | -1.03272 | -1.41537 |
| C                              | 0.54145  | -2.40741 | -1.55228 |
| C                              | -0.51101 | -0.64341 | -2.34267 |
| C                              | -0.38326 | -2.88283 | -2.54328 |
| C                              | -1.03017 | -1.78919 | -3.03873 |
| H                              | -0.50976 | -3.92215 | -2.81735 |
| H                              | -1.79359 | -1.74916 | -3.8053  |
| N                              | 0.51605  | 1.75537  | -0.89358 |

|                                |          |          |          |
|--------------------------------|----------|----------|----------|
| C                              | -1.00336 | 3.09767  | -2.01618 |
| H                              | -1.79424 | 3.36335  | -2.70598 |
| C                              | -0.4735  | 1.76734  | -1.853   |
| C                              | 2.47474  | 2.72213  | 1.1089   |
| C                              | 3.70139  | 1.00156  | 1.69374  |
| C                              | 2.37948  | -2.74022 | 0.03904  |
| C                              | -0.93566 | 0.65967  | -2.54692 |
| H                              | -1.71156 | 0.82236  | -3.28848 |
| C                              | 1.52596  | 3.51511  | 0.48394  |
| H                              | 1.50697  | 4.57138  | 0.73369  |
| C                              | 4.18931  | -0.28798 | 1.83434  |
| H                              | 5.03626  | -0.43297 | 2.49775  |
| C                              | 1.42631  | -3.20975 | -0.84993 |
| H                              | 1.38534  | -4.27944 | -1.02762 |
| C                              | -0.33195 | 3.89818  | -1.14422 |
| H                              | -0.45247 | 4.96002  | -0.97128 |
| C                              | 0.61681  | 3.05918  | -0.45782 |
| C                              | -4.28797 | 0.06205  | 1.14414  |
| C                              | -5.55193 | 0.29531  | 0.6506   |
| C                              | -4.78146 | 2.36164  | 0.49054  |
| S                              | -3.38191 | 1.55977  | 1.14039  |
| H                              | -4.75908 | 3.42282  | 0.26672  |
| N                              | -5.8159  | 1.60304  | 0.28209  |
| C                              | -3.69685 | -1.22376 | 1.65505  |
| C                              | -2.52448 | -1.71742 | 0.80842  |
| H                              | -4.46973 | -1.99482 | 1.66643  |
| H                              | -3.33186 | -1.11495 | 2.68343  |
| H                              | -2.79113 | -1.83484 | -0.24507 |
| H                              | -0.80244 | -1.00788 | 0.27247  |
| Cl                             | -2.13739 | -3.48623 | 1.33367  |
| C                              | -6.66073 | -0.7057  | 0.47995  |
| H                              | -6.97038 | -0.75563 | -0.57055 |
| H                              | -6.37197 | -1.71047 | 0.7978   |
| H                              | -7.54051 | -0.40219 | 1.05914  |
| <sup>4</sup> P-OH <sub>B</sub> |          |          |          |
| Fe                             | 1.42235  | -0.37944 | -0.13454 |
| O                              | -1.07802 | 1.22013  | 0.64299  |
| S                              | 3.40379  | -1.49452 | -0.97785 |
| H                              | 2.80233  | -2.56237 | -1.54946 |
| N                              | 0.8888   | -0.43363 | -2.08926 |
| C                              | -0.10241 | -1.00066 | -4.10175 |
| C                              | 0.55046  | 0.17669  | -4.29416 |
| H                              | -0.6804  | -1.57565 | -4.81385 |
| H                              | 0.622    | 0.76755  | -5.19838 |
| N                              | 2.49048  | 1.31314  | -0.45697 |
| C                              | 2.54576  | 2.027    | -1.62587 |

|    |          |          |          |
|----|----------|----------|----------|
| C  | 3.3887   | 3.18879  | -1.46553 |
| C  | 3.85432  | 3.16278  | -0.18704 |
| H  | 3.59417  | 3.91366  | -2.24278 |
| H  | 4.51784  | 3.86296  | 0.30406  |
| N  | 2.07523  | -0.388   | 1.76698  |
| C  | 2.9144   | 0.50507  | 2.37718  |
| C  | 1.73811  | -1.30287 | 2.72758  |
| C  | 3.11194  | 0.14886  | 3.7611   |
| C  | 2.376    | -0.97595 | 3.9804   |
| H  | 3.73232  | 0.69679  | 4.45865  |
| H  | 2.26875  | -1.54426 | 4.89545  |
| N  | 0.43668  | -2.11332 | 0.14931  |
| C  | -0.51492 | -3.95631 | 1.1702   |
| H  | -0.76158 | -4.65624 | 1.95831  |
| C  | 0.31589  | -2.78551 | 1.33579  |
| C  | 0.10167  | -1.36711 | -2.71965 |
| C  | 1.1616   | 0.52724  | -3.03249 |
| C  | 3.28503  | 1.99174  | 0.43519  |
| C  | 0.91775  | -2.41114 | 2.53181  |
| H  | 0.74027  | -3.0483  | 3.39338  |
| C  | -0.44749 | -2.48257 | -2.10337 |
| H  | -1.0606  | -3.13769 | -2.71522 |
| C  | 1.91056  | 1.6754   | -2.81343 |
| H  | 2.03763  | 2.3482   | -3.65647 |
| C  | 3.49117  | 1.61076  | 1.75505  |
| H  | 4.14274  | 2.23613  | 2.35816  |
| C  | -0.89478 | -3.98073 | -0.13652 |
| H  | -1.51883 | -4.704   | -0.64566 |
| C  | -0.29561 | -2.82314 | -0.76008 |
| C  | -3.73351 | 0.64905  | -0.42772 |
| C  | -5.05509 | 0.89528  | -0.14068 |
| C  | -5.07138 | -1.28479 | 0.22905  |
| S  | -3.40389 | -1.05511 | -0.21747 |
| H  | -5.44836 | -2.26913 | 0.48485  |
| N  | -5.80286 | -0.2103  | 0.22426  |
| C  | -2.6487  | 1.61189  | -0.83292 |
| C  | -2.06531 | 2.31222  | 0.35558  |
| H  | -3.05375 | 2.35556  | -1.53449 |
| H  | -1.84971 | 1.07841  | -1.37553 |
| H  | -2.57284 | 2.40445  | 1.30895  |
| H  | -0.64294 | 0.76736  | 1.38651  |
| Cl | -0.83147 | 3.51273  | 0.08566  |
| C  | -5.73924 | 2.23201  | -0.19203 |
| H  | -6.15009 | 2.49072  | 0.79096  |
| H  | -5.05388 | 3.02823  | -0.49324 |
| H  | -6.57961 | 2.20853  | -0.89595 |

<sup>2</sup>RC<sub>c</sub>

|    |          |          |          |
|----|----------|----------|----------|
| Fe | -1.27847 | -0.17264 | 0.19813  |
| O  | 0.24403  | -0.00496 | -0.35415 |
| S  | -3.78562 | -0.2848  | 0.73761  |
| H  | -3.89729 | 0.92014  | 1.3414   |
| N  | -2.00515 | 1.32431  | -0.95474 |
| C  | -2.48249 | 3.43044  | -1.7857  |
| C  | -2.73673 | 2.54023  | -2.78164 |
| H  | -2.5871  | 4.50762  | -1.80023 |
| H  | -3.09742 | 2.73404  | -3.78361 |
| N  | -1.81122 | -1.50002 | -1.22892 |
| C  | -2.25466 | -1.21791 | -2.49465 |
| C  | -2.41291 | -2.43451 | -3.25466 |
| C  | -2.06056 | -3.45872 | -2.43176 |
| H  | -2.75654 | -2.47922 | -4.2801  |
| H  | -2.05262 | -4.52088 | -2.64015 |
| N  | -0.85181 | -1.69298 | 1.44552  |
| C  | -0.85445 | -3.02843 | 1.1489   |
| C  | -0.41138 | -1.597   | 2.73856  |
| C  | -0.40608 | -3.79864 | 2.28353  |
| C  | -0.12937 | -2.90677 | 3.27364  |
| H  | -0.3233  | -4.87773 | 2.30289  |
| H  | 0.22858  | -3.09959 | 4.27678  |
| N  | -1.01831 | 1.13774  | 1.70791  |
| C  | -0.37962 | 2.07504  | 3.72164  |
| H  | -0.02348 | 2.12266  | 4.7427   |
| C  | -0.54431 | 0.85798  | 2.96477  |
| C  | -2.01409 | 2.66877  | -0.65399 |
| C  | -2.42799 | 1.23047  | -2.26205 |
| C  | -1.6805  | -2.86597 | -1.17241 |
| C  | -0.26537 | -0.41222 | 3.45012  |
| H  | 0.09779  | -0.4862  | 4.47072  |
| C  | -1.61187 | 3.21705  | 0.55236  |
| H  | -1.65689 | 4.29737  | 0.64784  |
| C  | -2.53086 | 0.05304  | -2.98422 |
| H  | -2.87102 | 0.12711  | -4.01255 |
| C  | -1.24176 | -3.58038 | -0.06804 |
| H  | -1.19268 | -4.66105 | -0.16153 |
| C  | -0.75384 | 3.0964   | 2.90376  |
| H  | -0.76738 | 4.15856  | 3.11121  |
| C  | -1.14832 | 2.49941  | 1.65116  |
| C  | 4.01015  | -0.08039 | -0.34084 |
| C  | 5.35224  | -0.31655 | -0.53598 |
| C  | 4.6219   | -2.34746 | -1.01012 |
| S  | 3.11537  | -1.55268 | -0.65593 |
| H  | 4.64413  | -3.39458 | -1.29279 |



|                              |          |          |          |
|------------------------------|----------|----------|----------|
| N                            | 5.68499  | -1.60596 | -0.91119 |
| C                            | 3.32334  | 1.20109  | 0.04959  |
| C                            | 2.76526  | 1.93751  | -1.17231 |
| H                            | 4.04148  | 1.84877  | 0.56273  |
| H                            | 2.50017  | 1.00705  | 0.74366  |
| H                            | 3.52961  | 2.09236  | -1.93572 |
| H                            | 1.91031  | 1.40697  | -1.59127 |
| Cl                           | 2.16393  | 3.59908  | -0.71432 |
| C                            | 6.47187  | 0.67495  | -0.38177 |
| H                            | 6.96953  | 0.84751  | -1.34382 |
| H                            | 6.12299  | 1.63935  | -0.00361 |
| H                            | 7.23126  | 0.28696  | 0.30664  |
| <sup>4</sup> RC <sub>c</sub> |          |          |          |
| Fe                           | -1.28579 | -0.16721 | 0.19167  |
| O                            | 0.25272  | -0.02499 | -0.32758 |
| S                            | -3.77798 | -0.29881 | 0.74143  |
| H                            | -3.90889 | 0.92838  | 1.29442  |
| N                            | -2.01194 | 1.28944  | -1.00052 |
| C                            | -2.51694 | 3.36774  | -1.88397 |
| C                            | -2.7638  | 2.44922  | -2.85573 |
| H                            | -2.63428 | 4.44289  | -1.92593 |
| H                            | -3.12962 | 2.61278  | -3.86122 |
| N                            | -1.79887 | -1.53731 | -1.19942 |
| C                            | -2.24457 | -1.29449 | -2.47228 |
| C                            | -2.39359 | -2.53272 | -3.19818 |
| C                            | -2.0341  | -3.53085 | -2.34681 |
| H                            | -2.73673 | -2.60864 | -4.22192 |
| H                            | -2.01874 | -4.59836 | -2.52534 |
| N                            | -0.85238 | -1.6544  | 1.48551  |
| C                            | -0.83884 | -2.99618 | 1.22332  |
| C                            | -0.4188  | -1.51977 | 2.77678  |
| C                            | -0.38608 | -3.73231 | 2.37904  |
| C                            | -0.12401 | -2.81217 | 3.34696  |
| H                            | -0.29052 | -4.80948 | 2.42625  |
| H                            | 0.23236  | -2.97489 | 4.35597  |
| N                            | -1.03808 | 1.18454  | 1.66886  |
| C                            | -0.41625 | 2.17788  | 3.66102  |
| H                            | -0.06635 | 2.25429  | 4.68248  |
| C                            | -0.57088 | 0.94012  | 2.93587  |
| C                            | -2.03734 | 2.64149  | -0.73407 |
| C                            | -2.43915 | 1.15706  | -2.30356 |
| C                            | -1.65914 | -2.90079 | -1.10418 |
| C                            | -0.28822 | -0.31481 | 3.4572   |
| H                            | 0.06868  | -0.35847 | 4.48178  |
| C                            | -1.64013 | 3.22668  | 0.45637  |
| H                            | -1.69503 | 4.30877  | 0.52173  |

|                                |          |          |          |
|--------------------------------|----------|----------|----------|
| C                              | -2.53068 | -0.0392  | -2.99545 |
| H                              | -2.87245 | 0.00527  | -4.02494 |
| C                              | -1.21761 | -3.58236 | 0.01953  |
| H                              | -1.15967 | -4.66466 | -0.04593 |
| C                              | -0.78972 | 3.17542  | 2.81406  |
| H                              | -0.80909 | 4.24265  | 2.99298  |
| C                              | -1.1745  | 2.54302  | 1.57583  |
| C                              | 4.02785  | -0.08121 | -0.33615 |
| C                              | 5.36992  | -0.30878 | -0.5413  |
| C                              | 4.64975  | -2.34608 | -1.00351 |
| S                              | 3.14065  | -1.56044 | -0.63975 |
| H                              | 4.67687  | -3.39389 | -1.28317 |
| N                              | 5.70845  | -1.59704 | -0.91526 |
| C                              | 3.33543  | 1.19678  | 0.05583  |
| C                              | 2.7642   | 1.92629  | -1.16417 |
| H                              | 4.05281  | 1.85051  | 0.56228  |
| H                              | 2.5185   | 0.99916  | 0.75623  |
| H                              | 3.52211  | 2.08313  | -1.93356 |
| H                              | 1.90952  | 1.38937  | -1.57557 |
| Cl                             | 2.15654  | 3.5857   | -0.70715 |
| C                              | 6.48384  | 0.69084  | -0.39879 |
| H                              | 6.97633  | 0.85947  | -1.36416 |
| H                              | 6.13031  | 1.65569  | -0.02618 |
| H                              | 7.24862  | 0.31282  | 0.28925  |
| <sup>2</sup> TS-H <sub>C</sub> |          |          |          |
| Fe                             | -1.02676 | 0.22244  | 0.39185  |
| O                              | -0.21669 | 0.01811  | -1.12082 |
| S                              | -2.32189 | 0.96152  | 2.36163  |
| H                              | -1.34912 | 0.81353  | 3.29019  |
| N                              | 0.17399  | 1.7357   | 0.98433  |
| C                              | 1.936    | 2.94032  | 1.87663  |
| C                              | 1.17719  | 3.81137  | 1.15859  |
| H                              | 2.84251  | 3.13684  | 2.43437  |
| H                              | 1.33058  | 4.87222  | 1.00772  |
| N                              | -2.22233 | 1.55902  | -0.57063 |
| C                              | -1.98047 | 2.89292  | -0.75257 |
| C                              | -3.01744 | 3.48668  | -1.56772 |
| C                              | -3.89132 | 2.49092  | -1.87208 |
| H                              | -3.05705 | 4.53049  | -1.8519  |
| H                              | -4.79826 | 2.54447  | -2.46062 |
| N                              | -2.35995 | -1.23464 | 0.00049  |
| C                              | -3.50199 | -1.12965 | -0.74375 |
| C                              | -2.26937 | -2.54954 | 0.36687  |
| C                              | -4.15479 | -2.41318 | -0.84903 |
| C                              | -3.38689 | -3.29791 | -0.15645 |
| H                              | -5.07697 | -2.59439 | -1.38615 |

|                                |          |          |          |
|--------------------------------|----------|----------|----------|
| H                              | -3.54468 | -4.35827 | -0.00719 |
| N                              | 0.07809  | -1.05936 | 1.47173  |
| C                              | 0.86276  | -2.98802 | 2.47936  |
| H                              | 0.89905  | -4.03043 | 2.76927  |
| C                              | -0.16282 | -2.39958 | 1.65281  |
| C                              | 1.3112   | 1.64584  | 1.75297  |
| C                              | 0.08357  | 3.05358  | 0.59939  |
| C                              | -3.38229 | 1.28991  | -1.24783 |
| C                              | -1.2495  | -3.09545 | 1.1368   |
| H                              | -1.30712 | -4.15733 | 1.35576  |
| C                              | 1.79857  | 0.47347  | 2.31139  |
| H                              | 2.7083   | 0.54337  | 2.89972  |
| C                              | -0.90252 | 3.58861  | -0.21775 |
| H                              | -0.83441 | 4.6486   | -0.44383 |
| C                              | -3.98347 | 0.04163  | -1.32381 |
| H                              | -4.90736 | -0.03159 | -1.88994 |
| C                              | 1.72218  | -1.98369 | 2.81033  |
| H                              | 2.61072  | -2.03152 | 3.4267   |
| C                              | 1.21773  | -0.78599 | 2.18466  |
| C                              | 3.08794  | -0.26288 | -1.33561 |
| C                              | 3.36307  | 1.02862  | -1.77399 |
| C                              | 5.09506  | 0.80182  | -0.41711 |
| S                              | 4.3258   | -0.7467  | -0.18941 |
| H                              | 6.0097   | 1.0479   | 0.11007  |
| N                              | 4.49347  | 1.60423  | -1.2481  |
| C                              | 1.96234  | -1.09804 | -1.73614 |
| C                              | 2.04555  | -2.56903 | -1.38641 |
| H                              | 1.68759  | -0.9372  | -2.78266 |
| H                              | 0.84095  | -0.57716 | -1.22114 |
| H                              | 2.96199  | -3.01946 | -1.78252 |
| H                              | 2.00981  | -2.74073 | -0.30838 |
| Cl                             | 0.68026  | -3.52003 | -2.10832 |
| C                              | 2.51085  | 1.79473  | -2.74452 |
| H                              | 2.60982  | 1.3999   | -3.76517 |
| H                              | 1.45276  | 1.73505  | -2.46859 |
| H                              | 2.82378  | 2.84143  | -2.75639 |
| <sup>4</sup> TS-H <sub>C</sub> |          |          |          |
| Fe                             | -1.08298 | 0.26746  | 0.37421  |
| O                              | -0.20116 | -0.01424 | -1.06862 |
| S                              | -2.21831 | 0.48548  | 2.47697  |
| H                              | -1.39823 | 1.39608  | 3.0476   |
| N                              | -0.10426 | 1.99432  | 0.73947  |
| C                              | 1.50638  | 3.52937  | 1.35619  |
| C                              | 0.54781  | 4.20683  | 0.66621  |
| H                              | 2.41681  | 3.9116   | 1.79956  |
| H                              | 0.50668  | 5.26187  | 0.42731  |

|    |          |          |          |
|----|----------|----------|----------|
| N  | -2.48181 | 1.25754  | -0.64658 |
| C  | -2.50769 | 2.60203  | -0.91914 |
| C  | -3.66903 | 2.92821  | -1.71437 |
| C  | -4.3475  | 1.76713  | -1.91136 |
| H  | -3.91658 | 3.92322  | -2.06158 |
| H  | -5.27057 | 1.60711  | -2.45373 |
| N  | -2.15272 | -1.42697 | 0.22069  |
| C  | -3.31921 | -1.59693 | -0.47621 |
| C  | -1.81751 | -2.66691 | 0.71163  |
| C  | -3.74302 | -2.97434 | -0.41286 |
| C  | -2.81133 | -3.63748 | 0.32414  |
| H  | -4.63675 | -3.36516 | -0.88214 |
| H  | -2.77881 | -4.68744 | 0.58501  |
| N  | 0.30811  | -0.72869 | 1.5023   |
| C  | 1.45103  | -2.38337 | 2.63533  |
| H  | 1.67184  | -3.36776 | 3.02811  |
| C  | 0.29656  | -2.05925 | 1.83034  |
| C  | 1.09318  | 2.14773  | 1.3943   |
| C  | -0.44665 | 3.2374   | 0.27632  |
| C  | -3.60394 | 0.73057  | -1.23324 |
| C  | -0.68544 | -2.96731 | 1.45437  |
| H  | -0.56039 | -3.99763 | 1.77247  |
| C  | 1.8114   | 1.13426  | 2.01785  |
| H  | 2.74017  | 1.41319  | 2.50558  |
| C  | -1.5713  | 3.52857  | -0.48706 |
| H  | -1.72087 | 4.56339  | -0.77944 |
| C  | -3.99906 | -0.59616 | -1.15981 |
| H  | -4.91575 | -0.87475 | -1.6702  |
| C  | 2.15544  | -1.2287  | 2.79291  |
| H  | 3.07699  | -1.06926 | 3.33765  |
| C  | 1.43129  | -0.2002  | 2.0844   |
| C  | 3.12996  | -0.23874 | -1.30422 |
| C  | 3.35962  | 1.10372  | -1.60426 |
| C  | 5.14722  | 0.77107  | -0.3449  |
| S  | 4.42236  | -0.81341 | -0.26462 |
| H  | 6.07575  | 0.9813   | 0.17368  |
| N  | 4.49654  | 1.64582  | -1.05765 |
| C  | 2.01357  | -1.05803 | -1.75227 |
| C  | 2.1062   | -2.54542 | -1.48754 |
| H  | 1.7261   | -0.83563 | -2.78442 |
| H  | 0.88138  | -0.57827 | -1.20229 |
| H  | 3.01625  | -2.97491 | -1.92046 |
| H  | 2.08591  | -2.7722  | -0.41893 |
| Cl | 0.72856  | -3.45603 | -2.23637 |
| C  | 2.46252  | 1.95124  | -2.45829 |
| H  | 2.64795  | 3.00699  | -2.2456  |

|                               |          |          |          |
|-------------------------------|----------|----------|----------|
| H                             | 2.6562   | 1.78505  | -3.52738 |
| H                             | 1.40839  | 1.72662  | -2.26899 |
| <sup>2</sup> INT <sub>C</sub> |          |          |          |
| Fe                            | -1.48413 | 0.11667  | -0.21415 |
| O                             | 0.18968  | -0.03651 | 0.49126  |
| S                             | -3.7456  | 0.55219  | -0.92693 |
| H                             | -4.32258 | -0.57968 | -0.46297 |
| N                             | -1.40837 | 2.11891  | 0.0628   |
| C                             | -1.51094 | 4.20828  | 1.04626  |
| C                             | -1.02708 | 4.38336  | -0.21247 |
| H                             | -1.70061 | 4.95575  | 1.80596  |
| H                             | -0.7346  | 5.30367  | -0.70159 |
| N                             | -0.73978 | 0.37359  | -2.06662 |
| C                             | -0.37624 | 1.54389  | -2.67038 |
| C                             | 0.13976  | 1.29157  | -3.99613 |
| C                             | 0.08165  | -0.05496 | -4.18398 |
| H                             | 0.49225  | 2.05437  | -4.67856 |
| H                             | 0.37569  | -0.62862 | -5.05372 |
| N                             | -1.65695 | -1.87019 | -0.51247 |
| C                             | -1.26197 | -2.55139 | -1.63416 |
| C                             | -2.1519  | -2.81754 | 0.34578  |
| C                             | -1.51218 | -3.96445 | -1.47915 |
| C                             | -2.06715 | -4.13005 | -0.2467  |
| H                             | -1.28867 | -4.71723 | -2.22428 |
| H                             | -2.39082 | -5.04609 | 0.23051  |
| N                             | -2.32471 | -0.12965 | 1.61456  |
| C                             | -3.24832 | -1.03835 | 3.53217  |
| H                             | -3.64162 | -1.79181 | 4.20254  |
| C                             | -2.74335 | -1.29945 | 2.20566  |
| C                             | -1.7469  | 2.79086  | 1.20785  |
| C                             | -0.9596  | 3.07119  | -0.81448 |
| C                             | -0.47206 | -0.61623 | -2.97271 |
| C                             | -2.66516 | -2.55328 | 1.61442  |
| H                             | -3.02353 | -3.40032 | 2.1918   |
| C                             | -2.25486 | 2.20702  | 2.36242  |
| H                             | -2.47282 | 2.87048  | 3.19422  |
| C                             | -0.48441 | 2.80763  | -2.09306 |
| H                             | -0.16124 | 3.65588  | -2.68934 |
| C                             | -0.71031 | -1.97237 | -2.77368 |
| H                             | -0.4523  | -2.64248 | -3.58882 |
| C                             | -3.11742 | 0.29954  | 3.74305  |
| H                             | -3.38415 | 0.87182  | 4.62237  |
| C                             | -2.53968 | 0.85832  | 2.54303  |
| C                             | 4.18113  | 0.08376  | 0.35042  |
| C                             | 4.0271   | 1.48135  | 0.59174  |
| C                             | 6.18555  | 1.32721  | 1.04917  |

|                               |          |          |          |
|-------------------------------|----------|----------|----------|
| S                             | 5.87499  | -0.34703 | 0.65503  |
| H                             | 7.17871  | 1.64784  | 1.34187  |
| N                             | 5.15712  | 2.13362  | 0.97556  |
| C                             | 3.19761  | -0.8029  | -0.05842 |
| C                             | 3.40361  | -2.2463  | -0.27587 |
| H                             | 2.17701  | -0.42978 | -0.14352 |
| H                             | 0.17984  | -0.78763 | 1.1099   |
| H                             | 2.75249  | -2.64321 | -1.05451 |
| H                             | 4.43972  | -2.52389 | -0.47477 |
| Cl                            | 2.93402  | -3.24167 | 1.24298  |
| C                             | 2.74376  | 2.23238  | 0.42228  |
| H                             | 2.56472  | 2.46856  | -0.63698 |
| H                             | 1.87867  | 1.65219  | 0.76177  |
| H                             | 2.79997  | 3.17635  | 0.9705   |
| <sup>4</sup> INT <sub>C</sub> |          |          |          |
| Fe                            | -1.53419 | -0.04419 | 0.25963  |
| O                             | -0.02473 | -0.14833 | -0.71978 |
| S                             | -3.51716 | 0.06824  | 1.42919  |
| H                             | -3.13242 | 0.95973  | 2.36894  |
| N                             | -2.54126 | -1.2817  | -0.96088 |
| C                             | -3.794   | -2.11728 | -2.70483 |
| C                             | -3.36073 | -3.18114 | -1.97411 |
| H                             | -4.40412 | -2.11589 | -3.59894 |
| H                             | -3.54144 | -4.23493 | -2.1431  |
| N                             | -0.88456 | -1.60873 | 1.332    |
| C                             | -1.13269 | -2.9343  | 1.08157  |
| C                             | -0.48769 | -3.75296 | 2.07937  |
| C                             | 0.13357  | -2.90533 | 2.94372  |
| H                             | -0.52589 | -4.83447 | 2.10378  |
| H                             | 0.7133   | -3.14522 | 3.82585  |
| N                             | -0.67874 | 1.2234   | 1.57361  |
| C                             | 0.05333  | 0.87776  | 2.68269  |
| C                             | -0.60864 | 2.59302  | 1.4728   |
| C                             | 0.56781  | 2.06331  | 3.32001  |
| C                             | 0.15952  | 3.12553  | 2.56935  |
| H                             | 1.1702   | 2.06455  | 4.21952  |
| H                             | 0.35915  | 4.17817  | 2.72362  |
| N                             | -2.11216 | 1.54031  | -0.8766  |
| C                             | -2.49618 | 3.68426  | -1.63223 |
| H                             | -2.44439 | 4.76485  | -1.66708 |
| C                             | -1.86875 | 2.86867  | -0.62274 |
| C                             | -3.26886 | -0.93298 | -2.07334 |
| C                             | -2.57052 | -2.65192 | -0.8914  |
| C                             | -0.1278  | -1.56558 | 2.47587  |
| C                             | -1.16144 | 3.36583  | 0.46129  |
| H                             | -1.02967 | 4.44092  | 0.52429  |

|                                  |          |          |          |
|----------------------------------|----------|----------|----------|
| C                                | -3.45055 | 0.35376  | -2.55795 |
| H                                | -4.06019 | 0.47193  | -3.44781 |
| C                                | -1.91654 | -3.43055 | 0.05194  |
| H                                | -2.02979 | -4.50728 | -0.02033 |
| C                                | 0.30833  | -0.41626 | 3.11539  |
| H                                | 0.90243  | -0.53625 | 4.01553  |
| C                                | -3.14376 | 2.83717  | -2.47891 |
| H                                | -3.73475 | 3.07817  | -3.35319 |
| C                                | -2.9128  | 1.50022  | -1.99207 |
| C                                | 4.15869  | -0.42723 | -0.62183 |
| C                                | 3.96269  | -1.76743 | -1.06082 |
| C                                | 6.14616  | -1.65626 | -1.39954 |
| S                                | 5.88051  | -0.03762 | -0.79033 |
| H                                | 7.13884  | -1.97738 | -1.69311 |
| N                                | 5.08429  | -2.41473 | -1.48188 |
| C                                | 3.19795  | 0.44664  | -0.12834 |
| C                                | 3.4625   | 1.82217  | 0.32382  |
| H                                | 2.16096  | 0.11884  | -0.1369  |
| H                                | -0.05028 | 0.56067  | -1.38858 |
| H                                | 2.78613  | 2.13568  | 1.11892  |
| H                                | 4.49802  | 2.00091  | 0.6166   |
| Cl                               | 3.14717  | 3.08298  | -1.03834 |
| C                                | 2.64837  | -2.48868 | -1.04543 |
| H                                | 2.45676  | -2.93631 | -0.05967 |
| H                                | 1.80631  | -1.82436 | -1.26151 |
| H                                | 2.67137  | -3.29967 | -1.77846 |
| <sup>2</sup> TS-reb <sub>C</sub> |          |          |          |
| Fe                               | -1.21777 | 0.08762  | 0.29338  |
| O                                | 0.68203  | 0.32013  | -0.66385 |
| S                                | -3.38906 | -0.31552 | 1.35005  |
| H                                | -4.14937 | -0.26378 | 0.23277  |
| N                                | -0.45144 | -1.11514 | 1.71962  |
| C                                | 0.31316  | -2.98755 | 2.83983  |
| C                                | 0.56906  | -1.91131 | 3.63449  |
| H                                | 0.51927  | -4.03305 | 3.03147  |
| H                                | 1.03025  | -1.88859 | 4.61398  |
| N                                | -0.85204 | 1.67633  | 1.47146  |
| C                                | -0.25056 | 1.68909  | 2.6999   |
| C                                | -0.14032 | 3.04315  | 3.19448  |
| C                                | -0.68624 | 3.84772  | 2.24297  |
| H                                | 0.29592  | 3.3213   | 4.14539  |
| H                                | -0.79138 | 4.92525  | 2.24916  |
| N                                | -2.11368 | 1.26603  | -1.09076 |
| C                                | -2.21494 | 2.63267  | -1.03098 |
| C                                | -2.70004 | 0.89732  | -2.27075 |
| C                                | -2.88313 | 3.13844  | -2.20774 |

|                                  |          |          |          |
|----------------------------------|----------|----------|----------|
| C                                | -3.18564 | 2.05816  | -2.97949 |
| H                                | -3.08835 | 4.18366  | -2.40083 |
| H                                | -3.68878 | 2.03275  | -3.93792 |
| N                                | -1.71421 | -1.52378 | -0.83882 |
| C                                | -2.46472 | -2.89559 | -2.54665 |
| H                                | -2.93538 | -3.18001 | -3.47935 |
| C                                | -2.35665 | -1.54101 | -2.05768 |
| C                                | -0.32478 | -2.47959 | 1.64561  |
| C                                | 0.09271  | -0.7492  | 2.91932  |
| C                                | -1.12805 | 2.98039  | 1.17313  |
| C                                | -2.8163  | -0.41629 | -2.72658 |
| H                                | -3.30466 | -0.56958 | -3.68472 |
| C                                | -0.75476 | -3.27196 | 0.59031  |
| H                                | -0.57402 | -4.33968 | 0.67065  |
| C                                | 0.186    | 0.56016  | 3.38345  |
| H                                | 0.64057  | 0.71275  | 4.35802  |
| C                                | -1.75799 | 3.42648  | 0.01388  |
| H                                | -1.91266 | 4.49768  | -0.07978 |
| C                                | -1.87511 | -3.69427 | -1.61529 |
| H                                | -1.76126 | -4.77097 | -1.62608 |
| C                                | -1.41034 | -2.82779 | -0.55531 |
| C                                | 3.50706  | 0.48562  | 0.6962   |
| C                                | 3.87137  | -0.89583 | 0.54428  |
| C                                | 3.64954  | -0.86481 | 2.73556  |
| S                                | 3.27571  | 0.79749  | 2.42154  |
| H                                | 3.66074  | -1.24586 | 3.74982  |
| N                                | 3.93759  | -1.60715 | 1.68761  |
| C                                | 2.64552  | 1.1834   | -0.13132 |
| C                                | 3.03048  | 2.70332  | 0.17892  |
| H                                | 3.31755  | 1.21933  | -1.00143 |
| H                                | 0.55846  | 0.26581  | -1.62572 |
| H                                | 2.62375  | 3.34472  | -0.60198 |
| H                                | 2.43326  | 2.83799  | 1.08334  |
| Cl                               | 4.45677  | 3.63315  | 0.62447  |
| C                                | 4.12509  | -1.56998 | -0.7638  |
| H                                | 3.21106  | -2.06527 | -1.1223  |
| H                                | 4.45089  | -0.86629 | -1.53515 |
| H                                | 4.88805  | -2.34331 | -0.63867 |
| <sup>4</sup> TS-reb <sub>C</sub> |          |          |          |
| Fe                               | 1.36493  | -0.10348 | 0.00083  |
| O                                | -0.51187 | 0.05554  | -0.04989 |
| S                                | 3.73613  | -0.18683 | 0.02209  |
| H                                | 3.88445  | -1.07307 | 1.03202  |
| N                                | 1.59158  | 1.29657  | -1.42958 |
| C                                | 1.77281  | 2.3513   | -3.4696  |
| C                                | 1.79576  | 3.31976  | -2.51211 |



|    |          |          |          |
|----|----------|----------|----------|
| H  | 1.83445  | 2.46381  | -4.54452 |
| H  | 1.87973  | 4.39158  | -2.63876 |
| N  | 1.35054  | 1.33748  | 1.41997  |
| C  | 1.46506  | 2.68796  | 1.21571  |
| C  | 1.43928  | 3.38205  | 2.48174  |
| C  | 1.32635  | 2.43151  | 3.44895  |
| H  | 1.5084   | 4.45633  | 2.59562  |
| H  | 1.2838   | 2.56299  | 4.52268  |
| N  | 1.26708  | -1.51848 | 1.4336   |
| C  | 1.19856  | -1.30747 | 2.78943  |
| C  | 1.16943  | -2.87569 | 1.24633  |
| C  | 1.08437  | -2.56948 | 3.4764   |
| C  | 1.06683  | -3.54086 | 2.52084  |
| H  | 1.01874  | -2.68003 | 4.55137  |
| H  | 0.98317  | -4.61247 | 2.64983  |
| N  | 1.25652  | -1.5394  | -1.42132 |
| C  | 1.21625  | -3.58652 | -2.48228 |
| H  | 1.16914  | -4.66195 | -2.59689 |
| C  | 1.19117  | -2.89736 | -1.21629 |
| C  | 1.63563  | 1.08976  | -2.78529 |
| C  | 1.67364  | 2.65349  | -1.23943 |
| C  | 1.28137  | 1.15454  | 2.77604  |
| C  | 1.14132  | -3.52598 | 0.01931  |
| H  | 1.07832  | -4.60939 | 0.02835  |
| C  | 1.53237  | -0.14005 | -3.42216 |
| H  | 1.5959   | -0.14954 | -4.5055  |
| C  | 1.61376  | 3.30913  | -0.0167  |
| H  | 1.69428  | 4.39139  | -0.02594 |
| C  | 1.20866  | -0.07142 | 3.42233  |
| H  | 1.15799  | -0.06484 | 4.50652  |
| C  | 1.32353  | -2.63411 | -3.44969 |
| H  | 1.38362  | -2.76657 | -4.52241 |
| C  | 1.36561  | -1.35819 | -2.77998 |
| C  | -3.55934 | -0.18045 | 0.04445  |
| C  | -3.87941 | -1.40042 | 0.68661  |
| C  | -5.12172 | -1.66913 | -1.11979 |
| S  | -4.4394  | -0.10629 | -1.4864  |
| H  | -5.81785 | -2.14003 | -1.8041  |
| N  | -4.74886 | -2.20407 | 0.01564  |
| C  | -2.67117 | 0.79566  | 0.50166  |
| C  | -2.41947 | 2.09062  | -0.17058 |
| H  | -2.2963  | 0.68893  | 1.51174  |
| H  | -0.80635 | -0.59478 | -0.71302 |
| H  | -1.45541 | 2.50666  | 0.10804  |
| H  | -2.50066 | 2.03472  | -1.25643 |
| Cl | -3.67981 | 3.35535  | 0.3511   |

|                                |          |          |          |
|--------------------------------|----------|----------|----------|
| C                              | -3.30471 | -1.84027 | 1.99967  |
| H                              | -3.67078 | -2.8411  | 2.2382   |
| H                              | -2.20849 | -1.85986 | 1.96565  |
| H                              | -3.59385 | -1.16252 | 2.81347  |
| <sup>2</sup> P-OH <sub>C</sub> |          |          |          |
| Fe                             | -1.30838 | -0.13943 | -0.41405 |
| O                              | 0.61375  | -0.1616  | 0.8952   |
| S                              | -3.19453 | -0.30444 | -1.59122 |
| H                              | -2.7364  | -1.11796 | -2.57038 |
| N                              | -2.28312 | -0.41668 | 1.32166  |
| C                              | -3.37432 | -1.42557 | 3.09299  |
| C                              | -3.52852 | -0.08268 | 3.24197  |
| H                              | -3.74203 | -2.22196 | 3.72759  |
| H                              | -4.05145 | 0.45526  | 4.02247  |
| N                              | -1.51781 | 1.84404  | -0.18504 |
| C                              | -2.19658 | 2.50859  | 0.80938  |
| C                              | -2.20751 | 3.9271   | 0.54635  |
| C                              | -1.54474 | 4.11345  | -0.62784 |
| H                              | -2.6712  | 4.66862  | 1.18441  |
| H                              | -1.34795 | 5.04027  | -1.15152 |
| N                              | -0.15389 | 0.14544  | -2.03903 |
| C                              | 0.05911  | 1.34591  | -2.67771 |
| C                              | 0.47416  | -0.80702 | -2.80998 |
| C                              | 0.85053  | 1.14504  | -3.8668  |
| C                              | 1.11144  | -0.18963 | -3.94675 |
| H                              | 1.15854  | 1.9335   | -4.54178 |
| H                              | 1.67476  | -0.72279 | -4.70214 |
| N                              | -0.89256 | -2.11634 | -0.51802 |
| C                              | -0.24165 | -4.20421 | -1.27314 |
| H                              | 0.24239  | -4.94603 | -1.89564 |
| C                              | -0.18143 | -2.78233 | -1.4948  |
| C                              | -2.59544 | -1.62512 | 1.89238  |
| C                              | -2.85056 | 0.53795  | 2.12835  |
| C                              | -1.12148 | 2.80978  | -1.07978 |
| C                              | 0.4757   | -2.17267 | -2.55511 |
| H                              | 1.00572  | -2.81333 | -3.25311 |
| C                              | -2.20646 | -2.87061 | 1.41753  |
| H                              | -2.53824 | -3.74136 | 1.97476  |
| C                              | -2.80588 | 1.90643  | 1.90168  |
| H                              | -3.30757 | 2.55163  | 2.61627  |
| C                              | -0.39277 | 2.58381  | -2.2396  |
| H                              | -0.145   | 3.44801  | -2.84817 |
| C                              | -1.01124 | -4.39824 | -0.16552 |
| H                              | -1.28605 | -5.33251 | 0.30756  |
| C                              | -1.41758 | -3.09556 | 0.29741  |
| C                              | 3.04287  | -0.18    | 0.93417  |

|                                |          |          |          |
|--------------------------------|----------|----------|----------|
| C                              | 4.11855  | -0.42624 | 0.11187  |
| C                              | 4.81862  | -1.55423 | 1.88362  |
| S                              | 3.29253  | -0.96629 | 2.4818   |
| H                              | 5.4502   | -2.17837 | 2.50615  |
| N                              | 5.1155   | -1.20772 | 0.66828  |
| C                              | 1.80745  | 0.62363  | 0.6628   |
| C                              | 1.63022  | 1.85075  | 1.56502  |
| H                              | 1.82324  | 0.95423  | -0.38009 |
| H                              | 0.7892   | -1.08431 | 0.63458  |
| H                              | 0.6688   | 2.32091  | 1.36157  |
| H                              | 1.69195  | 1.5772   | 2.61954  |
| Cl                             | 2.9144   | 3.08308  | 1.24696  |
| C                              | 4.32779  | 0.0772   | -1.28828 |
| H                              | 4.74429  | -0.72366 | -1.90721 |
| H                              | 3.40436  | 0.43235  | -1.75169 |
| H                              | 5.04906  | 0.90348  | -1.29315 |
| <sup>4</sup> P-OH <sub>C</sub> |          |          |          |
| Fe                             | -1.39783 | -0.09447 | -0.43798 |
| O                              | 0.72877  | -0.29323 | 0.89074  |
| S                              | -3.35692 | -0.12137 | -1.67928 |
| H                              | -3.22104 | -1.36291 | -2.19942 |
| N                              | -2.19653 | -0.99077 | 1.27889  |
| C                              | -3.05986 | -2.54319 | 2.74034  |
| C                              | -3.41466 | -1.31035 | 3.20323  |
| H                              | -3.29111 | -3.50975 | 3.17026  |
| H                              | -3.99438 | -1.07031 | 4.08576  |
| N                              | -1.81401 | 1.74414  | 0.32053  |
| C                              | -2.58076 | 2.00091  | 1.43048  |
| C                              | -2.78814 | 3.42897  | 1.54545  |
| C                              | -2.14307 | 4.01409  | 0.49695  |
| H                              | -3.35002 | 3.91     | 2.33613  |
| H                              | -2.07122 | 5.06818  | 0.26054  |
| N                              | -0.18692 | 0.79799  | -1.90993 |
| C                              | -0.1199  | 2.13926  | -2.17571 |
| C                              | 0.47269  | 0.15032  | -2.91899 |
| C                              | 0.65111  | 2.35474  | -3.38146 |
| C                              | 1.0186   | 1.12296  | -3.84237 |
| H                              | 0.86663  | 3.32165  | -3.81856 |
| H                              | 1.59058  | 0.88695  | -4.73106 |
| N                              | -0.72296 | -1.93548 | -1.04932 |
| C                              | 0.07545  | -3.62984 | -2.38731 |
| H                              | 0.58596  | -4.11581 | -3.20927 |
| C                              | -0.01682 | -2.20003 | -2.20486 |
| C                              | -2.30278 | -2.33065 | 1.52298  |
| C                              | -2.87643 | -0.34107 | 2.26971  |
| C                              | -1.53247 | 2.95128  | -0.27297 |

|                              |          |          |          |
|------------------------------|----------|----------|----------|
| C                            | 0.55103  | -1.2406  | -3.04795 |
| H                            | 1.09536  | -1.61993 | -3.90831 |
| C                            | -1.78999 | -3.32894 | 0.68892  |
| H                            | -1.96692 | -4.35704 | 0.99238  |
| C                            | -3.05438 | 1.04408  | 2.33331  |
| H                            | -3.63378 | 1.42157  | 3.17133  |
| C                            | -0.7427  | 3.1321   | -1.41214 |
| H                            | -0.60715 | 4.15732  | -1.74485 |
| C                            | -0.58054 | -4.2138  | -1.34271 |
| H                            | -0.71051 | -5.27027 | -1.14416 |
| C                            | -1.08349 | -3.15045 | -0.50448 |
| C                            | 3.15796  | -0.28806 | 0.89131  |
| C                            | 4.25595  | -0.39541 | 0.06949  |
| C                            | 4.95133  | -1.73203 | 1.69098  |
| S                            | 3.39601  | -1.26958 | 2.32348  |
| H                            | 5.58723  | -2.41843 | 2.2392   |
| N                            | 5.26357  | -1.21926 | 0.53959  |
| C                            | 1.90483  | 0.51525  | 0.70442  |
| C                            | 1.72373  | 1.66142  | 1.70776  |
| H                            | 1.90487  | 0.93924  | -0.3055  |
| H                            | 0.8418   | -1.12722 | 0.39887  |
| H                            | 0.75282  | 2.13136  | 1.55168  |
| H                            | 1.79935  | 1.30244  | 2.73538  |
| Cl                           | 2.98567  | 2.93667  | 1.48405  |
| C                            | 4.47497  | 0.29689  | -1.24657 |
| H                            | 4.97048  | -0.38747 | -1.94209 |
| H                            | 3.54169  | 0.64268  | -1.69846 |
| H                            | 5.12906  | 1.16806  | -1.11939 |
| <sup>2</sup> RC <sub>D</sub> |          |          |          |
| Fe                           | 1.62983  | 0.08139  | 0.21584  |
| O                            | 0.66639  | -0.35827 | -1.01941 |
| S                            | 3.31904  | 1.02252  | 1.90904  |
| H                            | 2.54016  | 1.99793  | 2.42952  |
| N                            | 0.11336  | 0.78444  | 1.34679  |
| C                            | -1.58448 | 2.11408  | 2.17611  |
| C                            | -1.72018 | 0.8863   | 2.74987  |
| H                            | -2.18837 | 2.99997  | 2.32562  |
| H                            | -2.45713 | 0.55566  | 3.47063  |
| N                            | 1.51718  | -1.68669 | 1.16809  |
| C                            | 0.56282  | -2.07567 | 2.07032  |
| C                            | 0.76857  | -3.44935 | 2.46081  |
| C                            | 1.86467  | -3.88598 | 1.78278  |
| H                            | 0.14916  | -3.99002 | 3.16477  |
| H                            | 2.3343   | -4.86074 | 1.81241  |
| N                            | 3.32287  | -0.52506 | -0.70208 |
| C                            | 3.88693  | -1.77602 | -0.64549 |

|                              |          |          |          |
|------------------------------|----------|----------|----------|
| C                            | 4.06626  | 0.18038  | -1.61233 |
| C                            | 5.02159  | -1.85528 | -1.53345 |
| C                            | 5.12942  | -0.64189 | -2.13831 |
| H                            | 5.64091  | -2.73325 | -1.66476 |
| H                            | 5.85754  | -0.31355 | -2.8688  |
| N                            | 1.93244  | 1.94769  | -0.50849 |
| C                            | 2.67319  | 3.70925  | -1.81179 |
| H                            | 3.28547  | 4.24744  | -2.52389 |
| C                            | 2.86666  | 2.3275   | -1.44583 |
| C                            | -0.43963 | 2.03634  | 1.3014   |
| C                            | -0.65926 | 0.06397  | 2.22149  |
| C                            | 2.32089  | -2.77735 | 0.97964  |
| C                            | 3.84822  | 1.50434  | -1.97304 |
| H                            | 4.51403  | 1.93469  | -2.71469 |
| C                            | 0.03588  | 3.09767  | 0.53606  |
| H                            | -0.50515 | 4.03693  | 0.59917  |
| C                            | -0.45288 | -1.26587 | 2.56284  |
| H                            | -1.14132 | -1.70959 | 3.2756   |
| C                            | 3.42935  | -2.8229  | 0.13998  |
| H                            | 3.9761   | -3.75957 | 0.08914  |
| C                            | 1.6058   | 4.16082  | -1.10039 |
| H                            | 1.15783  | 5.1462   | -1.1082  |
| C                            | 1.1386   | 3.05482  | -0.30091 |
| C                            | -4.20164 | -0.55581 | -1.5112  |
| C                            | -4.27171 | -1.81619 | -2.05781 |
| C                            | -2.06401 | -1.63864 | -1.99098 |
| S                            | -2.524   | -0.09913 | -1.31635 |
| H                            | -1.01369 | -1.88214 | -2.09544 |
| N                            | -3.05173 | -2.41266 | -2.32724 |
| C                            | -5.30926 | 0.35757  | -1.06105 |
| C                            | -5.46647 | 0.32493  | 0.4627   |
| H                            | -6.25311 | 0.05501  | -1.52524 |
| H                            | -5.11929 | 1.3895   | -1.37816 |
| H                            | -5.73431 | -0.67309 | 0.81395  |
| H                            | -4.55446 | 0.64877  | 0.96768  |
| Cl                           | -6.79119 | 1.44491  | 1.01964  |
| C                            | -5.5163  | -2.5921  | -2.38657 |
| H                            | -5.56429 | -3.51405 | -1.7945  |
| H                            | -6.42694 | -2.01782 | -2.19562 |
| H                            | -5.51165 | -2.8894  | -3.4415  |
| <sup>4</sup> RC <sub>D</sub> |          |          |          |
| Fe                           | 1.6498   | 0.11553  | 0.18686  |
| O                            | 0.69249  | -0.34026 | -1.04962 |
| S                            | 2.93432  | 0.76374  | 2.30367  |
| H                            | 2.67779  | 2.09145  | 2.2815   |
| N                            | 0.14002  | 0.73483  | 1.37752  |

|   |          |          |          |
|---|----------|----------|----------|
| C | -1.5782  | 1.99133  | 2.28636  |
| C | -1.67305 | 0.74075  | 2.8145   |
| H | -2.20248 | 2.85427  | 2.48001  |
| H | -2.38909 | 0.36587  | 3.53461  |
| N | 1.60481  | -1.68377 | 1.10031  |
| C | 0.66426  | -2.13712 | 1.98836  |
| C | 0.9175   | -3.51625 | 2.32941  |
| C | 2.02709  | -3.89258 | 1.6388   |
| H | 0.31783  | -4.10087 | 3.01506  |
| H | 2.52859  | -4.85178 | 1.63677  |
| N | 3.34212  | -0.41752 | -0.76951 |
| C | 3.94432  | -1.64472 | -0.75534 |
| C | 4.06368  | 0.34518  | -1.64781 |
| C | 5.07881  | -1.66107 | -1.64738 |
| C | 5.15223  | -0.42172 | -2.20458 |
| H | 5.72274  | -2.51554 | -1.81118 |
| H | 5.86945  | -0.04428 | -2.92203 |
| N | 1.85442  | 1.99972  | -0.50712 |
| C | 2.52225  | 3.81788  | -1.76803 |
| H | 3.11122  | 4.39673  | -2.46779 |
| C | 2.77307  | 2.4388   | -1.4265  |
| C | -0.45499 | 1.97852  | 1.38163  |
| C | -0.60605 | -0.03984 | 2.23809  |
| C | 2.44548  | -2.74574 | 0.86947  |
| C | 3.80407  | 1.67499  | -1.95625 |
| H | 4.46186  | 2.15671  | -2.67334 |
| C | -0.05038 | 3.05812  | 0.61404  |
| H | -0.62093 | 3.97712  | 0.7079   |
| C | -0.37734 | -1.37896 | 2.50872  |
| H | -1.05377 | -1.87043 | 3.2011   |
| C | 3.53553  | -2.73049 | 0.0128   |
| H | 4.1142   | -3.64527 | -0.07236 |
| C | 1.43484  | 4.20647  | -1.04781 |
| H | 0.94382  | 5.17098  | -1.03223 |
| C | 1.02663  | 3.06327  | -0.26782 |
| C | -4.16823 | -0.56291 | -1.53186 |
| C | -4.234   | -1.81604 | -2.09536 |
| C | -2.02704 | -1.62613 | -2.03909 |
| S | -2.4922  | -0.09865 | -1.34078 |
| H | -0.97599 | -1.86189 | -2.15345 |
| N | -3.01208 | -2.40133 | -2.38018 |
| C | -5.27838 | 0.33713  | -1.0617  |
| C | -5.42939 | 0.27704  | 0.46189  |
| H | -6.22264 | 0.03824  | -1.52743 |
| H | -5.09451 | 1.37529  | -1.36154 |
| H | -5.69314 | -0.7278  | 0.79641  |

|                                |          |          |          |
|--------------------------------|----------|----------|----------|
| H                              | -4.51629 | 0.59415  | 0.96923  |
| Cl                             | -6.75496 | 1.38329  | 1.04351  |
| C                              | -5.47585 | -2.59488 | -2.42753 |
| H                              | -5.51476 | -3.52516 | -1.84797 |
| H                              | -6.38878 | -2.02884 | -2.22339 |
| H                              | -5.47559 | -2.87761 | -3.48647 |
| <sup>2</sup> TS-S <sub>D</sub> |          |          |          |
| Fe                             | 1.12209  | -0.28145 | -0.41318 |
| O                              | 0.23722  | 0.23028  | 0.98912  |
| S                              | 2.6469   | -1.159   | -2.04353 |
| H                              | 2.30855  | -0.32972 | -3.05729 |
| N                              | 0.37958  | -2.15051 | -0.17615 |
| C                              | 0.00586  | -4.30885 | 0.55596  |
| C                              | -0.96272 | -4.02227 | -0.35478 |
| H                              | 0.15976  | -5.22406 | 1.11328  |
| H                              | -1.77119 | -4.65196 | -0.70367 |
| N                              | -0.25788 | 0.12451  | -1.8039  |
| C                              | -1.26662 | -0.71578 | -2.21899 |
| C                              | -2.06575 | -0.07431 | -3.23474 |
| C                              | -1.52104 | 1.15651  | -3.44531 |
| H                              | -2.92255 | -0.52545 | -3.71847 |
| H                              | -1.83791 | 1.92419  | -4.13982 |
| N                              | 1.94322  | 1.52876  | -0.74126 |
| C                              | 1.53143  | 2.49631  | -1.62448 |
| C                              | 3.04314  | 2.04384  | -0.1009  |
| C                              | 2.39333  | 3.65011  | -1.54136 |
| C                              | 3.32954  | 3.37019  | -0.59362 |
| H                              | 2.28321  | 4.54677  | -2.13791 |
| H                              | 4.14859  | 3.98998  | -0.25139 |
| N                              | 2.5776   | -0.72936 | 0.92999  |
| C                              | 4.38222  | -0.53821 | 2.35879  |
| H                              | 5.23328  | -0.08548 | 2.85136  |
| C                              | 3.57036  | 0.11185  | 1.35332  |
| C                              | 0.83655  | -3.13093 | 0.66218  |
| C                              | -0.71711 | -2.67103 | -0.806   |
| C                              | -0.39276 | 1.27068  | -2.55549 |
| C                              | 3.78793  | 1.3984   | 0.87854  |
| H                              | 4.62695  | 1.94517  | 1.29859  |
| C                              | 1.93734  | -3.01974 | 1.50334  |
| H                              | 2.18556  | -3.88153 | 2.11552  |
| C                              | -1.48967 | -2.00479 | -1.75043 |
| H                              | -2.33556 | -2.5414  | -2.1691  |
| C                              | 0.43865  | 2.38019  | -2.47405 |
| H                              | 0.21988  | 3.2189   | -3.12807 |
| C                              | 3.867    | -1.78421 | 2.5304   |
| H                              | 4.20459  | -2.56976 | 3.19432  |

|                                 |          |          |          |
|---------------------------------|----------|----------|----------|
| C                               | 2.73784  | -1.89284 | 1.63347  |
| C                               | -2.68248 | 0.90138  | 1.71595  |
| C                               | -2.7558  | 1.39524  | 2.99502  |
| C                               | -0.95196 | 2.52162  | 2.36225  |
| S                               | -1.31112 | 1.61852  | 0.89597  |
| H                               | -0.09588 | 3.18543  | 2.39449  |
| N                               | -1.76615 | 2.31532  | 3.34288  |
| C                               | -3.54802 | -0.10963 | 1.01676  |
| C                               | -4.39867 | 0.52466  | -0.08852 |
| H                               | -4.20798 | -0.58593 | 1.74791  |
| H                               | -2.92871 | -0.90305 | 0.58256  |
| H                               | -5.06026 | 1.29783  | 0.30612  |
| H                               | -3.78149 | 0.94622  | -0.88401 |
| Cl                              | -5.46679 | -0.71726 | -0.88188 |
| C                               | -3.77248 | 1.05388  | 4.04309  |
| H                               | -4.3238  | 1.95161  | 4.34732  |
| H                               | -4.49244 | 0.30802  | 3.69838  |
| H                               | -3.27305 | 0.66627  | 4.93881  |
| <sup>4</sup> TS- S <sub>D</sub> |          |          |          |
| Fe                              | -1.11191 | 0.49525  | -0.26153 |
| O                               | 0.09879  | -0.47246 | 0.6559   |
| S                               | -2.7548  | 1.60972  | -1.59205 |
| H                               | -1.95362 | 2.02672  | -2.59713 |
| N                               | -0.63501 | 2.10394  | 0.79787  |
| C                               | -0.60591 | 3.75936  | 2.40559  |
| C                               | 0.41296  | 4.02131  | 1.54391  |
| H                               | -0.90597 | 4.31409  | 3.28543  |
| H                               | 1.12327  | 4.83797  | 1.56617  |
| N                               | 0.29344  | 0.96878  | -1.65759 |
| C                               | 1.19138  | 1.99907  | -1.57642 |
| C                               | 2.08794  | 1.96718  | -2.70517 |
| C                               | 1.71922  | 0.89923  | -3.46893 |
| H                               | 2.89123  | 2.67242  | -2.87458 |
| H                               | 2.1575   | 0.55098  | -4.39564 |
| N                               | -1.58435 | -1.17545 | -1.37985 |
| C                               | -1.03609 | -1.55893 | -2.57679 |
| C                               | -2.54998 | -2.09638 | -1.08492 |
| C                               | -1.66659 | -2.77238 | -3.04319 |
| C                               | -2.60284 | -3.10951 | -2.11427 |
| H                               | -1.4154  | -3.28256 | -3.96446 |
| H                               | -3.28346 | -3.95149 | -2.11661 |
| N                               | -2.5893  | 0.07339  | 0.99901  |
| C                               | -4.32536 | -0.99134 | 2.08246  |
| H                               | -5.07655 | -1.74348 | 2.28729  |
| C                               | -3.41184 | -1.03217 | 0.96828  |
| C                               | -1.2566  | 2.56083  | 1.93224  |



|                               |          |          |          |
|-------------------------------|----------|----------|----------|
| C                             | 0.38384  | 2.99053  | 0.53309  |
| C                             | 0.60502  | 0.27228  | -2.80178 |
| C                             | -3.39224 | -2.04372 | 0.02042  |
| H                             | -4.11592 | -2.84467 | 0.1359   |
| C                             | -2.35028 | 1.9659   | 2.54185  |
| H                             | -2.74606 | 2.43537  | 3.4367   |
| C                             | 1.24062  | 2.94336  | -0.55451 |
| H                             | 2.00431  | 3.71154  | -0.62236 |
| C                             | -0.01934 | -0.88871 | -3.2439  |
| H                             | 0.33007  | -1.31502 | -4.17928 |
| C                             | -4.04936 | 0.14314  | 2.78271  |
| H                             | -4.52449 | 0.51285  | 3.68233  |
| C                             | -2.95839 | 0.79709  | 2.10576  |
| C                             | 2.59126  | -1.58547 | 1.25728  |
| C                             | 2.65907  | -2.59005 | 2.19111  |
| C                             | 0.89476  | -3.35806 | 1.08175  |
| S                             | 1.24023  | -1.88243 | 0.17735  |
| H                             | 0.06425  | -3.99024 | 0.79025  |
| N                             | 1.69061  | -3.58544 | 2.07874  |
| C                             | 3.41294  | -0.33698 | 1.10653  |
| C                             | 4.30272  | -0.37116 | -0.14003 |
| H                             | 4.04305  | -0.21226 | 1.99222  |
| H                             | 2.75303  | 0.53687  | 1.05607  |
| H                             | 4.98462  | -1.22323 | -0.1253  |
| H                             | 3.71419  | -0.39295 | -1.05919 |
| Cl                            | 5.3414   | 1.12073  | -0.24124 |
| C                             | 3.65119  | -2.72072 | 3.30838  |
| H                             | 4.23229  | -3.64416 | 3.19813  |
| H                             | 4.34697  | -1.87929 | 3.34665  |
| H                             | 3.12884  | -2.78413 | 4.27018  |
| <sup>2</sup> P-S <sub>D</sub> |          |          |          |
| Fe                            | 1.0944   | 0.24355  | 0.49705  |
| O                             | -0.13992 | 0.08235  | -1.36616 |
| S                             | 2.42472  | 0.54834  | 2.27855  |
| H                             | 3.19422  | 1.53531  | 1.7657   |
| N                             | 0.9598   | 2.21135  | 0.12066  |
| C                             | 1.35412  | 4.35388  | -0.65568 |
| C                             | 0.31849  | 4.43027  | 0.22291  |
| H                             | 1.81948  | 5.15051  | -1.22222 |
| H                             | -0.24708 | 5.30219  | 0.52627  |
| N                             | -0.56156 | 0.31859  | 1.64443  |
| C                             | -1.22078 | 1.46104  | 2.0283   |
| C                             | -2.29288 | 1.13742  | 2.94007  |
| C                             | -2.26737 | -0.21322 | 3.11273  |
| H                             | -2.96348 | 1.86232  | 3.38414  |
| H                             | -2.90903 | -0.8267  | 3.73275  |

|                               |          |          |          |
|-------------------------------|----------|----------|----------|
| N                             | 1.13423  | -1.75728 | 0.76105  |
| C                             | 0.32037  | -2.51992 | 1.56855  |
| C                             | 2.11419  | -2.60914 | 0.30249  |
| C                             | 0.77794  | -3.88608 | 1.59184  |
| C                             | 1.89228  | -3.94153 | 0.80953  |
| H                             | 0.3027   | -4.686   | 2.1452   |
| H                             | 2.52032  | -4.79646 | 0.5922   |
| N                             | 2.64956  | 0.13513  | -0.7726  |
| C                             | 4.45529  | -0.66301 | -1.97455 |
| H                             | 5.17917  | -1.3741  | -2.35238 |
| C                             | 3.39056  | -0.98497 | -1.05267 |
| C                             | 1.75154  | 2.96659  | -0.70866 |
| C                             | 0.07788  | 3.08785  | 0.70068  |
| C                             | -1.17409 | -0.71309 | 2.31366  |
| C                             | 3.15441  | -2.25767 | -0.54808 |
| H                             | 3.84211  | -3.0446  | -0.84345 |
| C                             | 2.80309  | 2.47912  | -1.47229 |
| H                             | 3.35099  | 3.18839  | -2.0851  |
| C                             | -0.92808 | 2.74783  | 1.59615  |
| H                             | -1.54779 | 3.55362  | 1.9775   |
| C                             | -0.77609 | -2.04309 | 2.27404  |
| H                             | -1.33837 | -2.75499 | 2.8705   |
| C                             | 4.34752  | 0.66521  | -2.24944 |
| H                             | 4.96489  | 1.27298  | -2.89883 |
| C                             | 3.2218   | 1.15568  | -1.49024 |
| C                             | -2.68522 | -1.11307 | -1.60259 |
| C                             | -2.971   | -2.38773 | -1.24435 |
| C                             | -0.76086 | -2.71956 | -1.44657 |
| S                             | -0.95308 | -1.01788 | -2.06523 |
| H                             | 0.20477  | -3.21146 | -1.48788 |
| N                             | -1.8697  | -3.29086 | -1.18256 |
| C                             | -3.59049 | 0.06752  | -1.81309 |
| C                             | -3.39722 | 1.13706  | -0.73255 |
| H                             | -4.63287 | -0.26647 | -1.81198 |
| H                             | -3.40724 | 0.51709  | -2.79661 |
| H                             | -3.61498 | 0.74736  | 0.26247  |
| H                             | -2.38728 | 1.54513  | -0.74014 |
| Cl                            | -4.53502 | 2.52646  | -1.0131  |
| C                             | -4.30907 | -2.97497 | -0.92081 |
| H                             | -4.26189 | -3.47281 | 0.05479  |
| H                             | -5.09897 | -2.2215  | -0.89311 |
| H                             | -4.5798  | -3.74095 | -1.65747 |
| <sup>4</sup> P-S <sub>D</sub> |          |          |          |
| Fe                            | 1.544    | 0.13507  | -0.10615 |
| O                             | -1.06927 | 0.03346  | 0.37755  |
| S                             | 3.96367  | 0.29394  | -0.39161 |

|   |          |          |          |
|---|----------|----------|----------|
| H | 3.92733  | 0.55897  | -1.7176  |
| N | 1.08739  | -0.04154 | -2.06003 |
| C | 0.82216  | -0.89515 | -4.19055 |
| C | 0.68331  | 0.45815  | -4.27845 |
| H | 0.75952  | -1.63183 | -4.98145 |
| H | 0.4854   | 1.05937  | -5.15682 |
| N | 1.19827  | 2.11906  | -0.21828 |
| C | 0.93284  | 2.85086  | -1.34908 |
| C | 0.86941  | 4.25739  | -1.03133 |
| C | 1.11007  | 4.36893  | 0.30287  |
| H | 0.66864  | 5.04241  | -1.74925 |
| H | 1.1471   | 5.26449  | 0.90987  |
| N | 1.69695  | 0.28269  | 1.89067  |
| C | 1.75932  | 1.44222  | 2.62593  |
| C | 1.8732   | -0.74406 | 2.7877   |
| C | 1.99116  | 1.139    | 4.01498  |
| C | 2.05917  | -0.21759 | 4.11586  |
| H | 2.08085  | 1.87921  | 4.7998   |
| H | 2.21785  | -0.82103 | 5.00058  |
| N | 1.4791   | -1.88607 | 0.06358  |
| C | 1.70189  | -4.02882 | 0.89841  |
| H | 1.84387  | -4.81817 | 1.6258   |
| C | 1.68083  | -2.62151 | 1.2083   |
| C | 1.06737  | -1.20039 | -2.80562 |
| C | 0.84887  | 0.98271  | -2.94837 |
| C | 1.31595  | 3.03062  | 0.8018   |
| C | 1.86297  | -2.09699 | 2.48017  |
| H | 2.01723  | -2.79753 | 3.29482  |
| C | 1.22092  | -2.48554 | -2.30409 |
| H | 1.18249  | -3.308   | -3.01145 |
| C | 0.77101  | 2.33083  | -2.62423 |
| H | 0.57425  | 3.02956  | -3.43123 |
| C | 1.59024  | 2.72579  | 2.12594  |
| H | 1.66276  | 3.55084  | 2.82738  |
| C | 1.5331   | -4.13846 | -0.4507  |
| H | 1.50607  | -5.03595 | -1.05576 |
| C | 1.40405  | -2.79811 | -0.96407 |
| C | -3.67781 | -0.83871 | -0.03559 |
| C | -4.17649 | -2.02527 | 0.3827   |
| C | -2.02376 | -2.66143 | 0.4315   |
| S | -1.91683 | -1.01255 | -0.33967 |
| H | -1.13846 | -3.28552 | 0.51719  |
| N | -3.22145 | -3.06113 | 0.61781  |
| C | -4.35829 | 0.46702  | -0.32998 |
| C | -4.07199 | 1.49409  | 0.77467  |
| H | -5.43879 | 0.31568  | -0.41861 |

|                              |          |          |          |
|------------------------------|----------|----------|----------|
| H                            | -4.01577 | 0.87256  | -1.28926 |
| H                            | -4.4561  | 1.15589  | 1.73864  |
| H                            | -3.00442 | 1.69735  | 0.86292  |
| Cl                           | -4.89525 | 3.07023  | 0.40724  |
| C                            | -5.60671 | -2.39207 | 0.62833  |
| H                            | -5.71611 | -2.79336 | 1.64289  |
| H                            | -6.27971 | -1.53955 | 0.5121   |
| H                            | -5.92235 | -3.18305 | -0.06261 |
| <sup>4</sup> RC <sub>E</sub> |          |          |          |
| Fe                           | 1.6498   | 0.11553  | 0.18686  |
| O                            | 0.69249  | -0.34026 | -1.04962 |
| S                            | 2.93432  | 0.76374  | 2.30367  |
| H                            | 2.67779  | 2.09145  | 2.2815   |
| N                            | 0.14002  | 0.73483  | 1.37752  |
| C                            | -1.5782  | 1.99133  | 2.28636  |
| C                            | -1.67305 | 0.74075  | 2.8145   |
| H                            | -2.20248 | 2.85427  | 2.48001  |
| H                            | -2.38909 | 0.36587  | 3.53461  |
| N                            | 1.60481  | -1.68377 | 1.10031  |
| C                            | 0.66426  | -2.13712 | 1.98836  |
| C                            | 0.9175   | -3.51625 | 2.32941  |
| C                            | 2.02709  | -3.89258 | 1.6388   |
| H                            | 0.31783  | -4.10087 | 3.01506  |
| H                            | 2.52859  | -4.85178 | 1.63677  |
| N                            | 3.34212  | -0.41752 | -0.76951 |
| C                            | 3.94432  | -1.64472 | -0.75534 |
| C                            | 4.06368  | 0.34518  | -1.64781 |
| C                            | 5.07881  | -1.66107 | -1.64738 |
| C                            | 5.15223  | -0.42172 | -2.20458 |
| H                            | 5.72274  | -2.51554 | -1.81118 |
| H                            | 5.86945  | -0.04428 | -2.92203 |
| N                            | 1.85442  | 1.99972  | -0.50712 |
| C                            | 2.52225  | 3.81788  | -1.76803 |
| H                            | 3.11122  | 4.39673  | -2.46779 |
| C                            | 2.77307  | 2.4388   | -1.4265  |
| C                            | -0.45499 | 1.97852  | 1.38163  |
| C                            | -0.60605 | -0.03984 | 2.23809  |
| C                            | 2.44548  | -2.74574 | 0.86947  |
| C                            | 3.80407  | 1.67499  | -1.95625 |
| H                            | 4.46186  | 2.15671  | -2.67334 |
| C                            | -0.05038 | 3.05812  | 0.61404  |
| H                            | -0.62093 | 3.97712  | 0.7079   |
| C                            | -0.37734 | -1.37896 | 2.50872  |
| H                            | -1.05377 | -1.87043 | 3.2011   |
| C                            | 3.53553  | -2.73049 | 0.0128   |
| H                            | 4.1142   | -3.64527 | -0.07236 |

|                              |          |          |          |
|------------------------------|----------|----------|----------|
| C                            | 1.43484  | 4.20647  | -1.04781 |
| H                            | 0.94382  | 5.17098  | -1.03223 |
| C                            | 1.02663  | 3.06327  | -0.26782 |
| C                            | -3.76395 | -1.07701 | -1.52553 |
| C                            | -2.57816 | -0.40932 | -1.7262  |
| C                            | -1.72648 | -2.33985 | -1.04976 |
| S                            | -3.42936 | -2.70163 | -0.96893 |
| H                            | -1.00618 | -3.1024  | -0.77949 |
| N                            | -1.43451 | -1.13814 | -1.4475  |
| C                            | -5.17646 | -0.61629 | -1.7624  |
| C                            | -5.72988 | -1.18549 | -3.07293 |
| H                            | -5.20953 | 0.47689  | -1.8043  |
| H                            | -5.83094 | -0.91938 | -0.937   |
| H                            | -5.15175 | -0.84087 | -3.93211 |
| H                            | -5.74064 | -2.27705 | -3.06436 |
| Cl                           | -7.44922 | -0.65361 | -3.35609 |
| C                            | -2.40571 | 1.00467  | -2.20579 |
| H                            | -1.86932 | 1.0253   | -3.16219 |
| H                            | -3.36189 | 1.51739  | -2.34127 |
| H                            | -1.80572 | 1.57847  | -1.49021 |
| <sup>2</sup> RC <sub>E</sub> |          |          |          |
| Fe                           | 1.62983  | 0.08139  | 0.21584  |
| O                            | 0.66639  | -0.35827 | -1.01941 |
| S                            | 3.31904  | 1.02252  | 1.90904  |
| H                            | 2.54016  | 1.99793  | 2.42952  |
| N                            | 0.11336  | 0.78444  | 1.34679  |
| C                            | -1.58448 | 2.11408  | 2.17611  |
| C                            | -1.72018 | 0.8863   | 2.74987  |
| H                            | -2.18837 | 2.99997  | 2.32562  |
| H                            | -2.45713 | 0.55566  | 3.47063  |
| N                            | 1.51718  | -1.68669 | 1.16809  |
| C                            | 0.56282  | -2.07567 | 2.07032  |
| C                            | 0.76857  | -3.44935 | 2.46081  |
| C                            | 1.86467  | -3.88598 | 1.78278  |
| H                            | 0.14916  | -3.99002 | 3.16477  |
| H                            | 2.3343   | -4.86074 | 1.81241  |
| N                            | 3.32287  | -0.52506 | -0.70208 |
| C                            | 3.88693  | -1.77602 | -0.64549 |
| C                            | 4.06626  | 0.18038  | -1.61233 |
| C                            | 5.02159  | -1.85528 | -1.53345 |
| C                            | 5.12942  | -0.64189 | -2.13831 |
| H                            | 5.64091  | -2.73325 | -1.66476 |
| H                            | 5.85754  | -0.31355 | -2.8688  |
| N                            | 1.93244  | 1.94769  | -0.50849 |
| C                            | 2.67319  | 3.70925  | -1.81179 |
| H                            | 3.28547  | 4.24744  | -2.52389 |

|                                |          |          |          |
|--------------------------------|----------|----------|----------|
| C                              | 2.86666  | 2.3275   | -1.44583 |
| C                              | -0.43963 | 2.03634  | 1.3014   |
| C                              | -0.65926 | 0.06397  | 2.22149  |
| C                              | 2.32089  | -2.77735 | 0.97964  |
| C                              | 3.84822  | 1.50434  | -1.97304 |
| H                              | 4.51403  | 1.93469  | -2.71469 |
| C                              | 0.03588  | 3.09767  | 0.53606  |
| H                              | -0.50515 | 4.03693  | 0.59917  |
| C                              | -0.45288 | -1.26587 | 2.56284  |
| H                              | -1.14132 | -1.70959 | 3.2756   |
| C                              | 3.42935  | -2.8229  | 0.13998  |
| H                              | 3.9761   | -3.75957 | 0.08914  |
| C                              | 1.6058   | 4.16082  | -1.10039 |
| H                              | 1.15783  | 5.1462   | -1.1082  |
| C                              | 1.1386   | 3.05482  | -0.30091 |
| C                              | -3.53605 | -0.126   | -2.66071 |
| C                              | -2.17176 | -0.00403 | -2.78758 |
| C                              | -2.19143 | -1.68513 | -1.34418 |
| S                              | -3.9025  | -1.42381 | -1.54607 |
| H                              | -1.84682 | -2.47072 | -0.68276 |
| N                              | -1.42573 | -0.89199 | -2.03149 |
| C                              | -4.63554 | 0.63269  | -3.35296 |
| C                              | -5.24033 | -0.19108 | -4.49455 |
| H                              | -4.24305 | 1.57105  | -3.75707 |
| H                              | -5.43004 | 0.90192  | -2.6474  |
| H                              | -4.49659 | -0.41492 | -5.2613  |
| H                              | -5.67129 | -1.12579 | -4.13092 |
| Cl                             | -6.58799 | 0.71076  | -5.32516 |
| C                              | -1.42709 | 0.97931  | -3.64644 |
| H                              | -0.83408 | 0.45654  | -4.40662 |
| H                              | -2.09719 | 1.67571  | -4.15783 |
| H                              | -0.72541 | 1.561    | -3.0377  |
| <sup>2</sup> TS-N <sub>E</sub> |          |          |          |
| Fe                             | 1.50807  | 0.09169  | 0.27794  |
| O                              | 0.33278  | 0.08459  | -0.94806 |
| S                              | 3.47255  | 0.3243   | 1.5552   |
| H                              | 2.93214  | 0.00222  | 2.75263  |
| N                              | 2.68216  | 0.81845  | -1.22102 |
| C                              | 4.056    | 0.96422  | -3.06412 |
| C                              | 3.71207  | 2.23427  | -2.71795 |
| H                              | 4.69165  | 0.63404  | -3.8759  |
| H                              | 4.00577  | 3.16503  | -3.18639 |
| N                              | 1.00876  | 1.98914  | 0.79433  |
| C                              | 1.41709  | 3.14043  | 0.1737   |
| C                              | 0.83043  | 4.28815  | 0.82771  |
| C                              | 0.06777  | 3.81223  | 1.84888  |

|                                 |          |          |          |
|---------------------------------|----------|----------|----------|
| H                               | 0.99807  | 5.31621  | 0.53234  |
| H                               | -0.52032 | 4.36687  | 2.56922  |
| N                               | 0.47172  | -0.60708 | 1.81457  |
| C                               | -0.27857 | 0.12624  | 2.70966  |
| C                               | 0.33954  | -1.9247  | 2.19631  |
| C                               | -0.89722 | -0.75194 | 3.66921  |
| C                               | -0.51382 | -2.01986 | 3.35303  |
| H                               | -1.53484 | -0.42279 | 4.48003  |
| H                               | -0.77301 | -2.94651 | 3.84952  |
| N                               | 2.08232  | -1.79541 | -0.20073 |
| C                               | 2.34147  | -4.08806 | -0.20741 |
| H                               | 2.22504  | -5.11617 | 0.11166  |
| C                               | 1.73453  | -2.94923 | 0.44414  |
| C                               | 3.40489  | 0.08394  | -2.12158 |
| C                               | 2.84793  | 2.13309  | -1.56473 |
| C                               | 0.19023  | 2.37226  | 1.81932  |
| C                               | 0.91735  | -3.01851 | 1.56596  |
| H                               | 0.724    | -3.99917 | 1.98998  |
| C                               | 3.51179  | -1.30067 | -2.13531 |
| H                               | 4.13398  | -1.74407 | -2.90655 |
| C                               | 2.26908  | 3.21728  | -0.91867 |
| H                               | 2.50106  | 4.20646  | -1.30117 |
| C                               | -0.42272 | 1.50582  | 2.71517  |
| H                               | -1.04511 | 1.9399   | 3.49161  |
| C                               | 3.0637   | -3.59882 | -1.25114 |
| H                               | 3.66432  | -4.14174 | -1.96995 |
| C                               | 2.90043  | -2.16262 | -1.2365  |
| C                               | -2.56078 | 0.1887   | -1.01205 |
| C                               | -3.71395 | -0.52175 | -1.24315 |
| C                               | -1.74169 | -1.88709 | -0.70172 |
| H                               | -1.00344 | -2.65127 | -0.49353 |
| C                               | -2.36339 | 1.67331  | -1.06139 |
| H                               | -2.16285 | 2.06855  | -0.05934 |
| H                               | -3.24136 | 2.18216  | -1.46765 |
| C                               | -5.09396 | -0.01145 | -1.55695 |
| H                               | -5.01733 | 0.94307  | -2.08756 |
| H                               | -5.61971 | -0.70118 | -2.22592 |
| N                               | -1.48387 | -0.61608 | -0.70216 |
| S                               | -3.39796 | -2.23808 | -1.06814 |
| C                               | -5.92337 | 0.18645  | -0.28251 |
| H                               | -6.05812 | -0.75181 | 0.25909  |
| H                               | -5.46154 | 0.91783  | 0.38299  |
| Cl                              | -7.58295 | 0.80655  | -0.67563 |
| H                               | -1.49033 | 1.90775  | -1.67663 |
| <sup>4</sup> TS- N <sub>E</sub> |          |          |          |
| Fe                              | 1.4667   | 0.14627  | 0.28221  |

|   |          |          |          |
|---|----------|----------|----------|
| O | 0.35343  | -0.00116 | -1.1158  |
| S | 2.78625  | 0.23874  | 2.39408  |
| H | 3.49415  | -0.89684 | 2.19864  |
| N | 2.31205  | 1.74831  | -0.52461 |
| C | 3.70625  | 3.13322  | -1.73791 |
| C | 2.79375  | 3.92797  | -1.11768 |
| H | 4.52109  | 3.42215  | -2.38957 |
| H | 2.70421  | 5.00643  | -1.15242 |
| N | 0.16912  | 1.32632  | 1.30695  |
| C | 0.07621  | 2.68835  | 1.23102  |
| C | -1.00726 | 3.16016  | 2.06055  |
| C | -1.56977 | 2.05898  | 2.63309  |
| H | -1.28516 | 4.19965  | 2.1817   |
| H | -2.40323 | 2.01006  | 3.32273  |
| N | 0.61522  | -1.51394 | 1.1728   |
| C | -0.44305 | -1.5255  | 2.04087  |
| C | 0.98774  | -2.81677 | 0.9986   |
| C | -0.75594 | -2.88446 | 2.42297  |
| C | 0.13248  | -3.68799 | 1.77471  |
| H | -1.54651 | -3.16753 | 3.10662  |
| H | 0.22287  | -4.76632 | 1.81785  |
| N | 2.84185  | -1.04067 | -0.57135 |
| C | 3.99954  | -2.89146 | -1.32216 |
| H | 4.26665  | -3.93384 | -1.44277 |
| C | 2.90194  | -2.41447 | -0.51496 |
| C | 3.40367  | 1.77321  | -1.35783 |
| C | 1.92996  | 3.05855  | -0.35323 |
| C | -0.83098 | 0.91475  | 2.15367  |
| C | 2.04777  | -3.24263 | 0.20175  |
| H | 2.23688  | -4.31093 | 0.15145  |
| C | 4.12997  | 0.66633  | -1.76843 |
| H | 4.97235  | 0.83678  | -2.43156 |
| C | 0.89519  | 3.50356  | 0.45413  |
| H | 0.71622  | 4.57378  | 0.49154  |
| C | -1.12191 | -0.40066 | 2.49502  |
| H | -1.94492 | -0.56191 | 3.18507  |
| C | 4.59279  | -1.79558 | -1.87019 |
| H | 5.44612  | -1.75182 | -2.53505 |
| C | 3.85666  | -0.64608 | -1.40219 |
| C | -2.32842 | 0.0892   | -1.64713 |
| C | -3.50934 | -0.60396 | -1.55518 |
| C | -1.48515 | -1.98623 | -1.33845 |
| H | -0.72686 | -2.74506 | -1.2012  |
| C | -2.12577 | 1.5579   | -1.85418 |
| H | -1.67979 | 2.00908  | -0.96264 |
| H | -3.07031 | 2.06226  | -2.07376 |



|                               |          |          |          |
|-------------------------------|----------|----------|----------|
| C                             | -4.91777 | -0.07592 | -1.5925  |
| H                             | -4.95389 | 0.82349  | -2.21552 |
| H                             | -5.59494 | -0.80368 | -2.05214 |
| N                             | -1.2207  | -0.7282  | -1.53268 |
| S                             | -3.18486 | -2.30825 | -1.29433 |
| C                             | -5.42184 | 0.26633  | -0.1849  |
| H                             | -5.44812 | -0.61583 | 0.45769  |
| H                             | -4.80048 | 1.03033  | 0.28556  |
| Cl                            | -7.11322 | 0.92157  | -0.24252 |
| H                             | -1.42891 | 1.72771  | -2.68058 |
| <sup>2</sup> P-N <sub>E</sub> |          |          |          |
| Fe                            | 1.39975  | 0.1112   | 0.4092   |
| O                             | 0.24996  | 0.00454  | -1.38721 |
| S                             | 2.78368  | 0.30547  | 2.18102  |
| H                             | 1.9827   | -0.25349 | 3.11698  |
| N                             | 1.86006  | 1.98057  | -0.18291 |
| C                             | 2.89618  | 3.81216  | -1.13922 |
| C                             | 1.89323  | 4.285    | -0.35225 |
| H                             | 3.60039  | 4.36918  | -1.74429 |
| H                             | 1.59967  | 5.31245  | -0.17686 |
| N                             | -0.18384 | 0.79662  | 1.46138  |
| C                             | -0.49972 | 2.11777  | 1.66282  |
| C                             | -1.64429 | 2.22853  | 2.5368   |
| C                             | -2.00884 | 0.95917  | 2.8717   |
| H                             | -2.0916  | 3.16327  | 2.85139  |
| H                             | -2.81314 | 0.63797  | 3.522    |
| N                             | 0.87206  | -1.76709 | 0.9286   |
| C                             | -0.15712 | -2.16324 | 1.75069  |
| C                             | 1.55002  | -2.91311 | 0.58792  |
| C                             | -0.13824 | -3.59543 | 1.91754  |
| C                             | 0.92096  | -4.06109 | 1.19655  |
| H                             | -0.84325 | -4.15658 | 2.51816  |
| H                             | 1.26211  | -5.08277 | 1.08437  |
| N                             | 2.90956  | -0.5842  | -0.72812 |
| C                             | 4.43633  | -2.00603 | -1.72128 |
| H                             | 4.92834  | -2.93591 | -1.97763 |
| C                             | 3.28931  | -1.89496 | -0.84673 |
| C                             | 2.87218  | 2.3716   | -1.02004 |
| C                             | 1.25192  | 3.13237  | 0.24198  |
| C                             | -1.08348 | 0.07281  | 2.2069   |
| C                             | 2.66538  | -2.97783 | -0.24067 |
| H                             | 3.08776  | -3.9611  | -0.42587 |
| C                             | 3.76798  | 1.51674  | -1.64779 |
| H                             | 4.52514  | 1.96181  | -2.28607 |
| C                             | 0.16214  | 3.20432  | 1.1008   |
| H                             | -0.20673 | 4.19415  | 1.35324  |

|                               |          |          |          |
|-------------------------------|----------|----------|----------|
| C                             | -1.08353 | -1.31051 | 2.33994  |
| H                             | -1.8459  | -1.75565 | 2.97232  |
| C                             | 4.74131  | -0.74483 | -2.12754 |
| H                             | 5.53676  | -0.42074 | -2.78671 |
| C                             | 3.78283  | 0.13589  | -1.49834 |
| C                             | -2.09798 | 0.23457  | -1.58533 |
| C                             | -3.22676 | -0.52882 | -1.61591 |
| C                             | -1.16156 | -1.85477 | -1.36865 |
| H                             | -0.36077 | -2.56885 | -1.26063 |
| C                             | -1.93409 | 1.70909  | -1.73209 |
| H                             | -2.87923 | 2.17552  | -2.02063 |
| H                             | -1.17716 | 1.92372  | -2.49295 |
| C                             | -4.65786 | -0.07322 | -1.68336 |
| H                             | -4.72049 | 0.85449  | -2.26111 |
| H                             | -5.27563 | -0.81208 | -2.20499 |
| N                             | -0.93514 | -0.5476  | -1.42944 |
| S                             | -2.82952 | -2.22908 | -1.46154 |
| C                             | -5.22776 | 0.16626  | -0.2787  |
| H                             | -5.23897 | -0.75283 | 0.31027  |
| H                             | -4.65635 | 0.92405  | 0.26037  |
| Cl                            | -6.94111 | 0.75243  | -0.36983 |
| H                             | -1.58453 | 2.15962  | -0.79855 |
| <sup>4</sup> P-N <sub>E</sub> |          |          |          |
| Fe                            | 1.43676  | 0.13381  | 0.39721  |
| O                             | 0.14062  | 0.08102  | -1.37064 |
| S                             | 2.95951  | 0.40787  | 2.13944  |
| H                             | 2.42437  | -0.49774 | 2.98961  |
| N                             | 0.08192  | 1.53881  | 1.21555  |
| C                             | -0.86506 | 3.52874  | 1.86105  |
| C                             | -1.53008 | 2.53127  | 2.51597  |
| H                             | -1.035   | 4.59654  | 1.92617  |
| H                             | -2.34685 | 2.62696  | 3.22107  |
| N                             | 0.43562  | -1.3615  | 1.35952  |
| C                             | -0.60254 | -1.2014  | 2.25046  |
| C                             | -0.9559  | -2.49224 | 2.79921  |
| C                             | -0.11814 | -3.41256 | 2.24019  |
| H                             | -1.74331 | -2.66032 | 3.52359  |
| H                             | -0.08681 | -4.48075 | 2.41648  |
| N                             | 2.62883  | -1.31659 | -0.56905 |
| C                             | 2.62021  | -2.65955 | -0.34344 |
| C                             | 3.64625  | -1.04809 | -1.43593 |
| C                             | 3.66668  | -3.2886  | -1.12905 |
| C                             | 4.302    | -2.28929 | -1.80615 |
| H                             | 3.88611  | -4.34914 | -1.14433 |
| H                             | 5.14233  | -2.37322 | -2.48424 |
| N                             | 2.38007  | 1.6097   | -0.61134 |

|                              |          |          |          |
|------------------------------|----------|----------|----------|
| C                            | 3.86226  | 2.75441  | -1.93848 |
| H                            | 4.67622  | 2.92488  | -2.632   |
| C                            | 3.43573  | 1.45105  | -1.46913 |
| C                            | 0.15768  | 2.89161  | 1.05316  |
| C                            | -0.91313 | 1.2826   | 2.11113  |
| C                            | 0.76005  | -2.6997  | 1.33854  |
| C                            | 4.01136  | 0.23456  | -1.8555  |
| H                            | 4.84642  | 0.30081  | -2.54758 |
| C                            | 1.09916  | 3.54011  | 0.24567  |
| H                            | 1.04279  | 4.62473  | 0.20812  |
| C                            | -1.2344  | 0.00295  | 2.57999  |
| H                            | -2.04186 | -0.06437 | 3.30433  |
| C                            | 1.74585  | -3.29951 | 0.54393  |
| H                            | 1.85348  | -4.37605 | 0.64704  |
| C                            | 3.05183  | 3.67738  | -1.34909 |
| H                            | 3.07032  | 4.75402  | -1.4639  |
| C                            | 2.11717  | 2.95125  | -0.51252 |
| C                            | -2.20959 | 0.20969  | -1.56991 |
| C                            | -3.30949 | -0.59489 | -1.56497 |
| C                            | -1.1974  | -1.82931 | -1.24624 |
| H                            | -0.37184 | -2.50759 | -1.09661 |
| C                            | -2.09749 | 1.68378  | -1.76476 |
| H                            | -3.07042 | 2.11668  | -2.00966 |
| H                            | -1.39125 | 1.90185  | -2.5723  |
| C                            | -4.75648 | -0.19967 | -1.67397 |
| H                            | -4.84999 | 0.67701  | -2.32304 |
| H                            | -5.33947 | -1.00054 | -2.14116 |
| N                            | -1.01729 | -0.52058 | -1.38177 |
| S                            | -2.85158 | -2.26904 | -1.31846 |
| C                            | -5.35197 | 0.12398  | -0.29768 |
| H                            | -5.31909 | -0.74134 | 0.36699  |
| H                            | -4.82924 | 0.95619  | 0.17697  |
| Cl                           | -7.09342 | 0.60699  | -0.44626 |
| H                            | -1.70773 | 2.16414  | -0.86238 |
| <sup>2</sup> RC <sub>F</sub> |          |          |          |
| Fe                           | -1.84948 | 0.00954  | -0.05458 |
| O                            | -0.63845 | -0.52971 | 0.88782  |
| S                            | -3.80125 | 1.14848  | -1.28977 |
| H                            | -4.81047 | 0.44633  | -0.72633 |
| N                            | -2.80715 | 0.94873  | 1.46297  |
| C                            | -4.06285 | 1.34199  | 3.36644  |
| C                            | -3.35211 | 2.47377  | 3.11468  |
| H                            | -4.76228 | 1.14917  | 4.16983  |
| H                            | -3.34739 | 3.40424  | 3.66778  |
| N                            | -0.91444 | 1.74187  | -0.50607 |
| C                            | -0.92043 | 2.90026  | 0.22634  |

|    |          |          |          |
|----|----------|----------|----------|
| C  | -0.0212  | 3.86744  | -0.35584 |
| C  | 0.53493  | 3.27691  | -1.44763 |
| H  | 0.14728  | 4.86334  | 0.03338  |
| H  | 1.25858  | 3.68345  | -2.14192 |
| N  | -1.12793 | -0.8169  | -1.74012 |
| C  | -0.21353 | -0.26858 | -2.59714 |
| C  | -1.35943 | -2.08603 | -2.1998  |
| C  | 0.14334  | -1.21358 | -3.6272  |
| C  | -0.57267 | -2.34497 | -3.38129 |
| H  | 0.84913  | -1.01771 | -4.42381 |
| H  | -0.58088 | -3.27426 | -3.93638 |
| N  | -3.00666 | -1.61619 | 0.24407  |
| C  | -3.87263 | -3.75488 | 0.11239  |
| H  | -4.03957 | -4.75214 | -0.27408 |
| C  | -2.98807 | -2.78131 | -0.47957 |
| C  | -3.70999 | 0.39044  | 2.34125  |
| C  | -2.564   | 2.2198   | 1.93358  |
| C  | -0.02415 | 1.94959  | -1.53083 |
| C  | -2.22799 | -3.00265 | -1.61989 |
| H  | -2.31422 | -3.97551 | -2.09449 |
| C  | -4.20035 | -0.90264 | 2.26352  |
| H  | -4.90385 | -1.21511 | 3.02933  |
| C  | -1.67969 | 3.1238   | 1.36869  |
| H  | -1.57904 | 4.0908   | 1.85196  |
| C  | 0.30589  | 1.01872  | -2.50402 |
| H  | 1.05033  | 1.30711  | -3.23754 |
| C  | -4.42142 | -3.16633 | 1.21016  |
| H  | -5.13364 | -3.57879 | 1.9133   |
| C  | -3.87249 | -1.83393 | 1.28215  |
| C  | 4.17636  | 0.00756  | 1.39398  |
| C  | 3.85593  | -1.09933 | 0.6426   |
| C  | 1.92923  | -0.89483 | 1.72292  |
| S  | 2.81053  | 0.44826  | 2.39624  |
| H  | 0.91088  | -1.10043 | 2.03361  |
| N  | 2.57914  | -1.59878 | 0.846    |
| C  | 5.44699  | 0.81419  | 1.40527  |
| C  | 5.3455   | 2.02657  | 0.47307  |
| H  | 6.28326  | 0.18357  | 1.08843  |
| H  | 5.68127  | 1.15951  | 2.41812  |
| H  | 5.18571  | 1.72069  | -0.56228 |
| H  | 4.53993  | 2.69905  | 0.77384  |
| Cl | 6.87636  | 3.00755  | 0.49804  |
| C  | 4.75373  | -1.79674 | -0.34054 |
| H  | 4.19481  | -2.03742 | -1.25081 |
| H  | 5.61153  | -1.178   | -0.6183  |
| H  | 5.14058  | -2.74051 | 0.06327  |

4RC<sub>F</sub>

|    |          |          |          |
|----|----------|----------|----------|
| Fe | -1.8434  | 0.01256  | -0.05169 |
| O  | -0.6432  | -0.33049 | 0.99423  |
| S  | -3.72963 | 0.82392  | -1.583   |
| H  | -4.77094 | 0.36737  | -0.85099 |
| N  | -2.72937 | 1.392    | 1.12769  |
| C  | -3.95486 | 2.38521  | 2.82097  |
| C  | -3.19123 | 3.35822  | 2.2558   |
| H  | -4.65859 | 2.46971  | 3.63915  |
| H  | -3.138   | 4.4084   | 2.51267  |
| N  | -0.82179 | 1.48585  | -0.9767  |
| C  | -0.76108 | 2.80541  | -0.61172 |
| C  | 0.17817  | 3.51546  | -1.44606 |
| C  | 0.68975  | 2.60681  | -2.31944 |
| H  | 0.40112  | 4.57127  | -1.36092 |
| H  | 1.4238   | 2.75759  | -3.10007 |
| N  | -1.18262 | -1.30451 | -1.42809 |
| C  | -0.24955 | -1.07584 | -2.40082 |
| C  | -1.48604 | -2.63731 | -1.504   |
| C  | 0.04791  | -2.29539 | -3.1126  |
| C  | -0.72507 | -3.26775 | -2.55599 |
| H  | 0.75622  | -2.37538 | -3.92687 |
| H  | -0.78738 | -4.31587 | -2.81934 |
| N  | -3.07734 | -1.39852 | 0.69944  |
| C  | -4.0533  | -3.4369  | 1.18318  |
| H  | -4.27615 | -4.49273 | 1.09754  |
| C  | -3.12867 | -2.72095 | 0.33838  |
| C  | -3.65507 | 1.15965  | 2.12193  |
| C  | -2.42299 | 2.73241  | 1.2078   |
| C  | 0.06393  | 1.34269  | -2.01707 |
| C  | -2.39683 | -3.2996  | -0.68963 |
| H  | -2.54091 | -4.36137 | -0.86583 |
| C  | -4.20897 | -0.07377 | 2.42255  |
| H  | -4.91931 | -0.11379 | 3.24281  |
| C  | -1.49761 | 3.38813  | 0.41273  |
| H  | -1.34533 | 4.44747  | 0.5954   |
| C  | 0.33479  | 0.15563  | -2.68041 |
| H  | 1.08436  | 0.18234  | -3.46325 |
| C  | -4.55564 | -2.53145 | 2.06659  |
| H  | -5.27798 | -2.68781 | 2.85751  |
| C  | -3.9392  | -1.26483 | 1.75437  |
| C  | 4.27204  | -0.64429 | 1.30368  |
| C  | 3.73976  | 0.55001  | 1.73111  |
| C  | 2.06944  | -0.77009 | 2.35486  |
| S  | 3.15636  | -1.94357 | 1.66537  |
| H  | 1.1188   | -1.07655 | 2.777    |

|                                |          |          |          |
|--------------------------------|----------|----------|----------|
| N                              | 2.48847  | 0.45892  | 2.32011  |
| C                              | 5.60337  | -0.91302 | 0.65516  |
| C                              | 6.65348  | -1.33174 | 1.69007  |
| H                              | 5.94578  | -0.0119  | 0.13742  |
| H                              | 5.51632  | -1.69706 | -0.10494 |
| H                              | 6.82163  | -0.54503 | 2.4276   |
| H                              | 6.36548  | -2.24873 | 2.20756  |
| Cl                             | 8.25903  | -1.66265 | 0.90338  |
| C                              | 4.3791   | 1.90449  | 1.60274  |
| H                              | 4.22435  | 2.47738  | 2.52265  |
| H                              | 5.45495  | 1.83136  | 1.42082  |
| <sup>2</sup> TS-O <sub>F</sub> |          |          |          |
| Fe                             | 1.46525  | -0.05287 | -0.14186 |
| O                              | -0.10446 | 0.50052  | 0.21084  |
| S                              | 3.85897  | -0.33228 | -0.77831 |
| H                              | 4.34053  | -0.62287 | 0.45176  |
| N                              | 1.45005  | 1.1859   | -1.75156 |
| C                              | 1.04512  | 2.0417   | -3.85979 |
| C                              | 1.52327  | 3.06182  | -3.09816 |
| H                              | 0.74858  | 2.05729  | -4.90083 |
| H                              | 1.70168  | 4.09098  | -3.38244 |
| N                              | 2.27108  | 1.45251  | 0.9638   |
| C                              | 2.48398  | 2.75169  | 0.56844  |
| C                              | 2.96852  | 3.53772  | 1.67848  |
| C                              | 3.03264  | 2.70559  | 2.75239  |
| H                              | 3.21984  | 4.58927  | 1.6243   |
| H                              | 3.34735  | 2.93127  | 3.76337  |
| N                              | 1.67782  | -1.30556 | 1.41259  |
| C                              | 2.09382  | -0.98479 | 2.68263  |
| C                              | 1.43996  | -2.65955 | 1.42764  |
| C                              | 2.097    | -2.15886 | 3.5206   |
| C                              | 1.69682  | -3.20003 | 2.73888  |
| H                              | 2.38337  | -2.17032 | 4.56459  |
| H                              | 1.58365  | -4.24206 | 3.00938  |
| N                              | 0.89305  | -1.58549 | -1.29449 |
| C                              | 0.25757  | -3.67925 | -2.03542 |
| H                              | 0.05896  | -4.74272 | -1.99967 |
| C                              | 0.74072  | -2.8948  | -0.92537 |
| C                              | 0.9992   | 0.87582  | -3.00689 |
| C                              | 1.76855  | 2.5171   | -1.7821  |
| C                              | 2.58786  | 1.40836  | 2.29985  |
| C                              | 1.00842  | -3.40449 | 0.33801  |
| H                              | 0.85411  | -4.46825 | 0.49089  |
| C                              | 0.56363  | -0.38006 | -3.40759 |
| H                              | 0.23821  | -0.48646 | -4.43828 |
| C                              | 2.24939  | 3.25053  | -0.70419 |

|                                 |          |          |          |
|---------------------------------|----------|----------|----------|
| H                               | 2.45679  | 4.30316  | -0.87138 |
| C                               | 2.49716  | 0.27959  | 3.10195  |
| H                               | 2.79035  | 0.38488  | 4.14236  |
| C                               | 0.11552  | -2.82247 | -3.08347 |
| H                               | -0.2165  | -3.03664 | -4.09148 |
| C                               | 0.52302  | -1.51977 | -2.61068 |
| C                               | -3.64869 | 0.2208   | 0.3234   |
| C                               | -4.94234 | 0.89605  | -0.03355 |
| H                               | -5.25308 | 0.60018  | -1.04072 |
| H                               | -4.82098 | 1.98471  | -0.04564 |
| C                               | -1.43048 | -0.44216 | 1.18335  |
| H                               | -0.72802 | -0.71275 | 1.96081  |
| S                               | -2.57309 | 0.88893  | 1.51502  |
| N                               | -1.93742 | -1.36087 | 0.35881  |
| C                               | -3.12212 | -0.97326 | -0.17026 |
| C                               | -6.05426 | 0.52864  | 0.958    |
| H                               | -6.24501 | -0.5459  | 0.96465  |
| H                               | -5.81164 | 0.85402  | 1.97116  |
| Cl                              | -7.62304 | 1.33404  | 0.51396  |
| C                               | -3.76324 | -1.85548 | -1.20662 |
| H                               | -3.01523 | -2.1615  | -1.94462 |
| H                               | -4.1577  | -2.7699  | -0.74572 |
| H                               | -4.5869  | -1.35879 | -1.72664 |
| <sup>4</sup> TS- O <sub>F</sub> |          |          |          |
| Fe                              | 1.50299  | 0.00025  | 0.15817  |
| O                               | -0.10894 | -0.4547  | -0.13224 |
| S                               | 3.7491   | 0.83814  | 0.49214  |
| H                               | 4.34025  | 0.1916   | -0.53798 |
| N                               | 0.98394  | 1.73644  | 1.05772  |
| C                               | 0.3661   | 3.92705  | 1.43878  |
| C                               | 0.24534  | 3.26406  | 2.62133  |
| H                               | 0.16718  | 4.9695   | 1.22559  |
| H                               | -0.06624 | 3.64963  | 3.58383  |
| N                               | 1.47087  | -0.9367  | 1.92121  |
| C                               | 1.05471  | -0.41724 | 3.12018  |
| C                               | 1.12962  | -1.42473 | 4.15299  |
| C                               | 1.60796  | -2.55351 | 3.56524  |
| H                               | 0.85663  | -1.2658  | 5.18845  |
| H                               | 1.80723  | -3.51769 | 4.01523  |
| N                               | 2.22413  | -1.65389 | -0.72358 |
| C                               | 2.46932  | -2.86144 | -0.12325 |
| C                               | 2.48219  | -1.83461 | -2.06121 |
| C                               | 2.90614  | -3.82711 | -1.10242 |
| C                               | 2.90805  | -3.19176 | -2.3058  |
| H                               | 3.16642  | -4.85423 | -0.88065 |
| H                               | 3.1736   | -3.58762 | -3.27783 |

|                                 |          |          |          |
|---------------------------------|----------|----------|----------|
| N                               | 1.66926  | 1.00128  | -1.61617 |
| C                               | 1.99448  | 1.48871  | -3.84979 |
| H                               | 2.23431  | 1.32507  | -4.89276 |
| C                               | 2.02159  | 0.4674   | -2.83018 |
| C                               | 0.82015  | 2.96347  | 0.46579  |
| C                               | 0.63322  | 1.896    | 2.37026  |
| C                               | 1.81726  | -2.23892 | 2.17097  |
| C                               | 2.38008  | -0.85863 | -3.04401 |
| H                               | 2.62825  | -1.14961 | -4.06029 |
| C                               | 1.03071  | 3.24986  | -0.87535 |
| H                               | 0.8598   | 4.27198  | -1.19859 |
| C                               | 0.65615  | 0.89419  | 3.33411  |
| H                               | 0.35576  | 1.16535  | 4.34166  |
| C                               | 2.29584  | -3.1363  | 1.22735  |
| H                               | 2.53217  | -4.14012 | 1.56679  |
| C                               | 1.6303   | 2.64765  | -3.23456 |
| H                               | 1.50609  | 3.63139  | -3.66889 |
| C                               | 1.42782  | 2.33514  | -1.84078 |
| C                               | -3.65475 | -0.22388 | -0.2581  |
| C                               | -4.93987 | -0.8408  | 0.21494  |
| H                               | -5.24243 | -0.39007 | 1.16557  |
| H                               | -4.81069 | -1.9129  | 0.39897  |
| C                               | -1.4509  | 0.31291  | -1.23627 |
| H                               | -0.75547 | 0.45834  | -2.05205 |
| S                               | -2.58253 | -1.06722 | -1.33877 |
| N                               | -1.959   | 1.34877  | -0.56478 |
| C                               | -3.13479 | 1.04081  | 0.02941  |
| C                               | -6.06381 | -0.64138 | -0.81068 |
| H                               | -6.26372 | 0.41755  | -0.98328 |
| H                               | -5.82696 | -1.11928 | -1.76287 |
| Cl                              | -7.62145 | -1.37856 | -0.23067 |
| C                               | -3.77981 | 2.07298  | 0.91298  |
| H                               | -4.17114 | 2.90378  | 0.31238  |
| H                               | -4.60605 | 1.66298  | 1.49978  |
| H                               | -3.03471 | 2.49109  | 1.59713  |
| <sup>2</sup> INT-O <sub>F</sub> |          |          |          |
| Fe                              | -1.55143 | -0.15797 | 0.18957  |
| O                               | 0.03284  | 0.2955   | -0.69588 |
| S                               | -3.59355 | -0.84457 | 1.15294  |
| H                               | -3.38565 | -0.39888 | 2.4125   |
| N                               | -1.59948 | -1.89915 | -0.82593 |
| C                               | -1.9387  | -3.51173 | -2.45051 |
| C                               | -1.26302 | -4.10611 | -1.43163 |
| H                               | -2.27409 | -3.94674 | -3.3831  |
| H                               | -0.92808 | -5.13216 | -1.35128 |
| N                               | -0.62812 | -1.06226 | 1.74531  |



|    |          |          |          |
|----|----------|----------|----------|
| C  | -0.229   | -2.37187 | 1.80201  |
| C  | 0.39085  | -2.65643 | 3.07422  |
| C  | 0.35966  | -1.50131 | 3.79294  |
| H  | 0.79107  | -3.61951 | 3.36332  |
| H  | 0.72964  | -1.31896 | 4.79361  |
| N  | -1.57163 | 1.56341  | 1.25005  |
| C  | -1.08708 | 1.78627  | 2.51038  |
| C  | -2.07404 | 2.76305  | 0.82601  |
| C  | -1.28657 | 3.16112  | 2.89549  |
| C  | -1.90112 | 3.77099  | 1.8432   |
| H  | -0.98937 | 3.58874  | 3.84433  |
| H  | -2.21288 | 4.8033   | 1.75037  |
| N  | -2.53637 | 0.72755  | -1.33585 |
| C  | -3.54274 | 2.3254   | -2.66889 |
| H  | -3.91879 | 3.29469  | -2.96978 |
| C  | -2.8949  | 2.04555  | -1.40745 |
| C  | -2.13632 | -2.13335 | -2.06535 |
| C  | -1.05723 | -3.09112 | -0.4235  |
| C  | -0.27231 | -0.51157 | 2.95563  |
| C  | -2.68371 | 2.98807  | -0.40731 |
| H  | -3.03119 | 3.99827  | -0.6036  |
| C  | -2.76027 | -1.1738  | -2.85224 |
| H  | -3.13278 | -1.49257 | -3.82131 |
| C  | -0.40731 | -3.30693 | 0.78585  |
| H  | -0.02282 | -4.30637 | 0.96631  |
| C  | -0.48159 | 0.81534  | 3.31007  |
| H  | -0.14082 | 1.12578  | 4.29351  |
| C  | -3.57065 | 1.15239  | -3.35753 |
| H  | -3.97403 | 0.95581  | -4.34247 |
| C  | -2.93699 | 0.16706  | -2.51162 |
| C  | 3.63815  | 0.39968  | -0.89107 |
| C  | 5.05887  | 0.04598  | -1.23501 |
| H  | 5.43515  | 0.6999   | -2.02873 |
| H  | 5.11895  | -0.9831  | -1.60842 |
| C  | 1.13465  | 0.77973  | -0.13381 |
| H  | 1.05591  | 1.02737  | 0.93231  |
| S  | 2.61409  | -0.68737 | -0.02971 |
| N  | 1.75476  | 1.82987  | -0.85591 |
| C  | 3.00023  | 1.64539  | -1.2045  |
| C  | 5.97148  | 0.17716  | -0.00936 |
| H  | 5.99317  | 1.20082  | 0.36923  |
| H  | 5.65825  | -0.4945  | 0.79098  |
| Cl | 7.69621  | -0.25939 | -0.41059 |
| H  | 3.0493   | 3.60302  | -2.05778 |
| H  | 4.61922  | 3.0764   | -1.40987 |
| H  | 4.03579  | 2.41976  | -2.94245 |

<sup>2</sup>TS-epo<sub>F</sub>

|    |          |          |          |
|----|----------|----------|----------|
| Fe | -1.55143 | -0.15797 | 0.18957  |
| O  | 0.03284  | 0.2955   | -0.69588 |
| S  | -3.59355 | -0.84457 | 1.15294  |
| H  | -3.38565 | -0.39888 | 2.4125   |
| N  | -1.59948 | -1.89915 | -0.82593 |
| C  | -1.9387  | -3.51173 | -2.45051 |
| C  | -1.26302 | -4.10611 | -1.43163 |
| H  | -2.27409 | -3.94674 | -3.3831  |
| H  | -0.92808 | -5.13216 | -1.35128 |
| N  | -0.62812 | -1.06226 | 1.74531  |
| C  | -0.229   | -2.37187 | 1.80201  |
| C  | 0.39085  | -2.65643 | 3.07422  |
| C  | 0.35966  | -1.50131 | 3.79294  |
| H  | 0.79107  | -3.61951 | 3.36332  |
| H  | 0.72964  | -1.31896 | 4.79361  |
| C  | -1.08708 | 1.78627  | 2.51038  |
| C  | -2.07404 | 2.76305  | 0.82601  |
| C  | -1.28657 | 3.16112  | 2.89549  |
| C  | -1.90112 | 3.77099  | 1.8432   |
| H  | -0.98937 | 3.58874  | 3.84433  |
| H  | -2.21288 | 4.8033   | 1.75037  |
| N  | -2.53637 | 0.72755  | -1.33585 |
| C  | -3.54274 | 2.3254   | -2.66889 |
| H  | -3.91879 | 3.29469  | -2.96978 |
| C  | -2.8949  | 2.04555  | -1.40745 |
| C  | -2.13632 | -2.13335 | -2.06535 |
| C  | -1.05723 | -3.09112 | -0.4235  |
| C  | -0.27231 | -0.51157 | 2.95563  |
| C  | -2.68371 | 2.98807  | -0.40731 |
| H  | -3.03119 | 3.99827  | -0.6036  |
| C  | -2.76027 | -1.1738  | -2.85224 |
| H  | -3.13278 | -1.49257 | -3.82131 |
| C  | -0.40731 | -3.30693 | 0.78585  |
| H  | -0.02282 | -4.30637 | 0.96631  |
| C  | -0.48159 | 0.81534  | 3.31007  |
| H  | -0.14082 | 1.12578  | 4.29351  |
| C  | -3.57065 | 1.15239  | -3.35753 |
| H  | -3.97403 | 0.95581  | -4.34247 |
| C  | -2.93699 | 0.16706  | -2.51162 |
| C  | 3.63815  | 0.39968  | -0.89107 |
| C  | 5.05887  | 0.04598  | -1.23501 |
| H  | 5.43515  | 0.6999   | -2.02873 |
| H  | 5.11895  | -0.9831  | -1.60842 |
| C  | 1.13465  | 0.77973  | -0.13381 |
| H  | 1.05591  | 1.02737  | 0.93231  |

|                                  |          |          |          |
|----------------------------------|----------|----------|----------|
| S                                | 2.61409  | -0.68737 | -0.02971 |
| N                                | 1.75476  | 1.82987  | -0.85591 |
| C                                | 3.00023  | 1.64539  | -1.2045  |
| C                                | 5.97148  | 0.17716  | -0.00936 |
| H                                | 5.99317  | 1.20082  | 0.36923  |
| H                                | 5.65825  | -0.4945  | 0.79098  |
| Cl                               | 7.69621  | -0.25939 | -0.41059 |
| C                                | 3.71966  | 2.74886  | -1.9451  |
| H                                | 3.0493   | 3.60302  | -2.05778 |
| H                                | 4.61922  | 3.0764   | -1.40987 |
| H                                | 4.03579  | 2.41976  | -2.94245 |
| <sup>4</sup> TS-epo <sub>F</sub> |          |          |          |
| S                                | 2.89215  | 0.94054  | 2.04272  |
| H                                | 4.006    | 1.05131  | 1.28492  |
| N                                | -0.00215 | 0.30014  | 1.77999  |
| C                                | -1.72158 | 1.02776  | 3.13007  |
| C                                | -1.46457 | -0.26712 | 3.46698  |
| H                                | -2.46237 | 1.69933  | 3.54478  |
| H                                | -1.94842 | -0.87727 | 4.21912  |
| N                                | 1.75358  | -1.73006 | 0.8004   |
| C                                | 1.13303  | -2.4632  | 1.78394  |
| C                                | 1.71123  | -3.78218 | 1.85041  |
| C                                | 2.70285  | -3.82818 | 0.91819  |
| H                                | 1.39582  | -4.55652 | 2.53809  |
| H                                | 3.36911  | -4.64805 | 0.68183  |
| N                                | 2.92605  | 0.1655   | -0.9829  |
| C                                | 3.72627  | -0.90948 | -1.28258 |
| C                                | 3.29543  | 1.17512  | -1.83758 |
| C                                | 4.64978  | -0.55624 | -2.33147 |
| C                                | 4.38252  | 0.7344   | -2.67535 |
| H                                | 5.3921   | -1.22554 | -2.7474  |
| H                                | 4.86051  | 1.34375  | -3.43183 |
| N                                | 0.99936  | 2.11842  | -0.18588 |
| C                                | 1.05462  | 4.17832  | -1.21807 |
| H                                | 1.3764   | 4.95595  | -1.89911 |
| C                                | 1.63662  | 2.85866  | -1.14597 |
| C                                | -0.80898 | 1.37256  | 2.06805  |
| C                                | -0.39454 | -0.71767 | 2.61195  |
| C                                | 2.73551  | -2.53725 | 0.27713  |
| C                                | 2.70573  | 2.42909  | -1.91913 |
| H                                | 3.11348  | 3.12672  | -2.64377 |
| C                                | -0.79409 | 2.59991  | 1.4183   |
| H                                | -1.49902 | 3.35255  | 1.75604  |
| C                                | 0.12843  | -2.00429 | 2.62285  |
| H                                | -0.27408 | -2.70177 | 3.35047  |
| C                                | 3.65066  | -2.16655 | -0.69732 |

|                                 |          |          |          |
|---------------------------------|----------|----------|----------|
| H                               | 4.36363  | -2.91571 | -1.02633 |
| C                               | 0.07113  | 4.22621  | -0.27866 |
| H                               | -0.58395 | 5.05059  | -0.02728 |
| C                               | 0.05045  | 2.93602  | 0.36972  |
| C                               | -2.31616 | -3.88172 | -0.87721 |
| H                               | -1.35796 | -4.29946 | -1.10577 |
| H                               | -2.67192 | -4.28926 | 0.04596  |
| O                               | 0.20989  | -0.51887 | -0.96011 |
| C                               | -1.21416 | -0.55073 | -1.21988 |
| C                               | -2.20287 | -2.48642 | -0.76033 |
| C                               | -3.06088 | -1.64187 | -0.03168 |
| S                               | -2.52464 | 0.00849  | -0.18418 |
| N                               | -1.17042 | -1.82025 | -1.43271 |
| C                               | -4.26169 | -2.02875 | 0.77977  |
| H                               | -4.69462 | -2.94459 | 0.36526  |
| H                               | -5.03953 | -1.26013 | 0.7166   |
| C                               | -3.89287 | -2.25387 | 2.25171  |
| H                               | -3.16559 | -3.05991 | 2.36269  |
| H                               | -3.49443 | -1.34755 | 2.71144  |
| Cl                              | -5.35088 | -2.7299  | 3.23133  |
| H                               | -3.00491 | -4.11924 | -1.66087 |
| H                               | -1.36297 | -0.07583 | -2.1671  |
| <sup>2</sup> P-epo <sub>F</sub> |          |          |          |
| Fe                              | 1.47798  | 0.01647  | -0.41613 |
| O                               | -0.64005 | 0.08645  | 0.41204  |
| S                               | 3.47069  | -0.00549 | -1.42355 |
| H                               | 4.17735  | 0.63627  | -0.46466 |
| N                               | 0.53933  | 0.50122  | -2.12839 |
| C                               | -0.48646 | 0.40243  | -4.1991  |
| C                               | -0.27113 | 1.71648  | -3.92061 |
| H                               | -0.94423 | -0.03608 | -5.07684 |
| H                               | -0.51835 | 2.58325  | -4.52051 |
| N                               | 1.60057  | 1.96099  | 0.09482  |
| C                               | 1.28158  | 3.02852  | -0.71207 |
| C                               | 1.60608  | 4.26852  | -0.05058 |
| C                               | 2.13173  | 3.94403  | 1.16291  |
| H                               | 1.44523  | 5.25195  | -0.47404 |
| H                               | 2.49428  | 4.60499  | 1.9401   |
| N                               | 2.23151  | -0.46199 | 1.38843  |
| C                               | 2.69172  | 0.38774  | 2.36837  |
| C                               | 2.50679  | -1.73239 | 1.83498  |
| C                               | 3.25664  | -0.36534 | 3.46103  |
| C                               | 3.1462   | -1.68047 | 3.1273   |
| H                               | 3.68136  | 0.07116  | 4.35625  |
| H                               | 3.45963  | -2.54828 | 3.69387  |
| N                               | 1.13651  | -1.92323 | -0.81702 |

|                                 |          |          |          |
|---------------------------------|----------|----------|----------|
| C                               | 1.19681  | -4.2312  | -0.70589 |
| H                               | 1.41208  | -5.21548 | -0.30932 |
| C                               | 1.55157  | -2.98994 | -0.05934 |
| C                               | 0.02663  | -0.34821 | -3.07798 |
| C                               | 0.3666   | 1.76874  | -2.62574 |
| C                               | 2.13597  | 2.50446  | 1.24147  |
| C                               | 2.19954  | -2.9081  | 1.1652   |
| H                               | 2.47403  | -3.84163 | 1.64705  |
| C                               | 0.01091  | -1.73258 | -2.98713 |
| H                               | -0.42528 | -2.28665 | -3.81272 |
| C                               | 0.71585  | 2.94487  | -1.9769  |
| H                               | 0.51741  | 3.87791  | -2.49555 |
| C                               | 2.63658  | 1.77512  | 2.31261  |
| H                               | 3.03729  | 2.32949  | 3.15581  |
| C                               | 0.56315  | -3.90339 | -1.86503 |
| H                               | 0.15352  | -4.56173 | -2.62079 |
| C                               | 0.53976  | -2.46158 | -1.93052 |
| C                               | -3.34327 | -0.16099 | 1.54226  |
| C                               | -4.83888 | -0.17366 | 1.39156  |
| H                               | -5.30672 | 0.42004  | 2.18547  |
| H                               | -5.21301 | -1.19653 | 1.49366  |
| C                               | -0.94379 | 0.53471  | 1.70713  |
| H                               | -0.11506 | 0.93092  | 2.28725  |
| S                               | -2.53181 | 1.37532  | 1.94099  |
| N                               | -1.10342 | -0.88285 | 1.58815  |
| C                               | -2.47973 | -1.19028 | 1.3762   |
| C                               | -5.26517 | 0.38631  | 0.0277   |
| H                               | -4.94278 | 1.4204   | -0.10281 |
| H                               | -4.86807 | -0.21586 | -0.79099 |
| Cl                              | -7.0717  | 0.37399  | -0.13541 |
| C                               | -2.76643 | -2.61753 | 1.02292  |
| H                               | -2.32439 | -2.86363 | 0.04952  |
| H                               | -2.31284 | -3.28926 | 1.76082  |
| H                               | -3.83873 | -2.82302 | 0.97794  |
| <sup>4</sup> P-epo <sub>F</sub> |          |          |          |
| Fe                              | 1.47798  | 0.01647  | -0.41613 |
| O                               | -1.98418 | -0.14912 | 1.44915  |
| S                               | 3.47069  | -0.00549 | -1.42355 |
| H                               | 4.17735  | 0.63627  | -0.46466 |
| N                               | 0.53933  | 0.50122  | -2.12839 |
| C                               | -0.48646 | 0.40243  | -4.1991  |
| C                               | -0.27113 | 1.71648  | -3.92061 |
| H                               | -0.94423 | -0.03608 | -5.07684 |
| H                               | -0.51835 | 2.58325  | -4.52051 |
| N                               | 1.60057  | 1.96099  | 0.09482  |
| C                               | 1.28158  | 3.02852  | -0.71207 |

|    |          |          |          |
|----|----------|----------|----------|
| C  | 1.60608  | 4.26852  | -0.05058 |
| C  | 2.13173  | 3.94403  | 1.16291  |
| H  | 1.44523  | 5.25195  | -0.47404 |
| H  | 2.49428  | 4.60499  | 1.9401   |
| N  | 2.23151  | -0.46199 | 1.38843  |
| C  | 2.69172  | 0.38774  | 2.36837  |
| C  | 2.50679  | -1.73239 | 1.83498  |
| C  | 3.25664  | -0.36534 | 3.46103  |
| C  | 3.1462   | -1.68047 | 3.1273   |
| H  | 3.68136  | 0.07116  | 4.35625  |
| H  | 3.45963  | -2.54828 | 3.69387  |
| N  | 1.13651  | -1.92323 | -0.81702 |
| C  | 1.19681  | -4.2312  | -0.70589 |
| H  | 1.41208  | -5.21548 | -0.30932 |
| C  | 1.55157  | -2.98994 | -0.05934 |
| C  | 0.02663  | -0.34821 | -3.07798 |
| C  | 0.3666   | 1.76874  | -2.62574 |
| C  | 2.13597  | 2.50446  | 1.24147  |
| C  | 2.19954  | -2.9081  | 1.1652   |
| H  | 2.47403  | -3.84163 | 1.64705  |
| C  | 0.01091  | -1.73258 | -2.98713 |
| H  | -0.42528 | -2.28665 | -3.81272 |
| C  | 0.71585  | 2.94487  | -1.9769  |
| H  | 0.51741  | 3.87791  | -2.49555 |
| C  | 2.63658  | 1.77512  | 2.31261  |
| H  | 3.03729  | 2.32949  | 3.15581  |
| C  | 0.56315  | -3.90339 | -1.86503 |
| H  | 0.15352  | -4.56173 | -2.62079 |
| C  | 0.53976  | -2.46158 | -1.93052 |
| C  | -4.66659 | -0.35302 | 2.52655  |
| C  | -6.16221 | -0.3657  | 2.37585  |
| H  | -6.63005 | 0.22801  | 3.16975  |
| H  | -6.53633 | -1.38856 | 2.47795  |
| C  | -2.26711 | 0.34268  | 2.69142  |
| H  | -1.43838 | 0.73889  | 3.27153  |
| S  | -3.85513 | 1.18328  | 2.92528  |
| N  | -2.42674 | -1.07488 | 2.57244  |
| C  | -3.80305 | -1.38231 | 2.36049  |
| C  | -6.58849 | 0.19428  | 1.01199  |
| H  | -6.2661  | 1.22837  | 0.88148  |
| H  | -6.1914  | -0.40789 | 0.1933   |
| Cl | -8.39502 | 0.18196  | 0.84888  |
| C  | -4.08975 | -2.80956 | 2.00721  |
| H  | -3.64772 | -3.05566 | 1.03381  |
| H  | -3.63616 | -3.4813  | 2.74511  |
| H  | -5.16205 | -3.01505 | 1.96222  |

## P-epo

|    |          |          |          |
|----|----------|----------|----------|
| C  | -0.23522 | -0.00519 | -0.43594 |
| C  | -1.07476 | 1.03289  | -0.23693 |
| C  | -2.66021 | -0.78763 | -0.00081 |
| S  | -1.06226 | -1.57441 | -0.34585 |
| N  | -2.48814 | 0.69424  | -0.02212 |
| C  | 1.21923  | -0.01602 | -0.70879 |
| C  | 2.00978  | -0.17076 | 0.58896  |
| H  | 1.52234  | 0.92248  | -1.23165 |
| H  | 1.49168  | -0.82755 | -1.42345 |
| H  | 1.78445  | 0.63478  | 1.31337  |
| H  | 1.82333  | -1.14479 | 1.08098  |
| Cl | 3.75771  | -0.08285 | 0.1997   |
| C  | -0.77943 | 2.48323  | -0.24971 |
| H  | -0.94151 | 2.92608  | 0.74851  |
| H  | 0.25409  | 2.70169  | -0.55018 |
| H  | -1.45244 | 3.02192  | -0.93959 |
| O  | -2.65659 | -0.05281 | 1.23326  |
| H  | -3.57354 | -1.29185 | -0.31123 |

## TS-OMe1

|    |          |          |          |
|----|----------|----------|----------|
| C  | 0.3432   | 0.45819  | 0.62813  |
| C  | -0.32828 | 1.45603  | 0.01144  |
| C  | -2.1919  | 0.08906  | 0.46345  |
| O  | -2.96558 | -1.90987 | -0.00822 |
| C  | -2.50905 | -2.44333 | -1.21927 |
| H  | -2.5138  | -3.56431 | -1.24476 |
| H  | -3.10011 | -2.14159 | -2.12082 |
| H  | -1.44854 | -2.17315 | -1.46473 |
| N  | -1.74957 | 1.27011  | -0.01876 |
| S  | -0.81043 | -0.932   | 1.03852  |
| H  | -3.20679 | -0.00724 | 0.78019  |
| O  | -2.58146 | 2.28553  | -0.4531  |
| C  | 1.8246   | 0.31518  | 0.79222  |
| H  | 2.30113  | 1.29885  | 0.87191  |
| H  | 2.07009  | -0.26524 | 1.68844  |
| C  | 2.35119  | -0.41067 | -0.44394 |
| H  | 2.22987  | 0.16725  | -1.35652 |
| H  | 1.95293  | -1.41731 | -0.54346 |
| Cl | 4.28775  | -0.66909 | -0.30446 |
| C  | 0.13867  | 2.7513   | -0.57584 |
| H  | 0.73751  | 3.33509  | 0.13231  |
| H  | 0.71798  | 2.60488  | -1.49582 |
| H  | -0.81256 | 3.25868  | -0.80238 |

## TS-OMe2

|   |          |          |         |
|---|----------|----------|---------|
| C | -0.06724 | -1.19233 | 0.46681 |
| C | -0.80981 | -0.15651 | 1.13024 |

|        |          |          |          |
|--------|----------|----------|----------|
| C      | -2.61893 | 0.11596  | -0.51371 |
| O      | -0.49262 | 1.73704  | -0.52718 |
| C      | -0.73386 | 3.11495  | -0.72681 |
| H      | -1.81801 | 3.36113  | -0.70811 |
| H      | -0.26357 | 3.79344  | 0.02143  |
| H      | -0.38093 | 3.48255  | -1.71969 |
| N      | -1.8654  | 0.43409  | 0.63166  |
| S      | -0.75005 | -2.30927 | -0.65462 |
| C      | 1.44815  | -1.12856 | 0.58222  |
| H      | 1.77614  | -0.72839 | 1.5428   |
| H      | 1.89883  | -2.10766 | 0.41198  |
| C      | 1.86476  | -0.1533  | -0.53804 |
| H      | 1.30196  | 0.78745  | -0.50184 |
| H      | 1.80129  | -0.62776 | -1.51463 |
| Cl     | 3.7582   | 0.26755  | -0.3487  |
| C      | -0.19828 | 0.59255  | 2.30513  |
| H      | 0.44664  | -0.02087 | 2.93911  |
| H      | 0.3591   | 1.43348  | 1.87349  |
| H      | -1.01419 | 1.00539  | 2.90456  |
| H      | -2.09478 | 0.45463  | -1.41417 |
| O      | -3.77637 | -0.3156  | -0.48405 |
| P-OMe1 |          |          |          |
| C      | 0.43729  | 0.20085  | -0.5697  |
| C      | -0.39444 | 1.22587  | -0.19219 |
| C      | -2.07177 | -0.57459 | -0.52821 |
| S      | -0.43523 | -1.2679  | -0.98224 |
| N      | -1.77756 | 0.87509  | -0.22306 |
| C      | 1.91191  | 0.18737  | -0.65474 |
| C      | 2.51854  | -0.44218 | 0.5983   |
| H      | 2.30249  | 1.2242   | -0.78807 |
| H      | 2.25705  | -0.35839 | -1.56391 |
| H      | 2.21535  | 0.08843  | 1.52031  |
| H      | 2.24871  | -1.5104  | 0.70556  |
| Cl     | 4.30518  | -0.34209 | 0.47262  |
| C      | -0.0098  | 2.60023  | 0.19968  |
| H      | 0.69273  | 2.59654  | 1.04656  |
| H      | 0.46755  | 3.13832  | -0.63368 |
| H      | -0.88833 | 3.19933  | 0.50711  |
| O      | -2.35066 | -1.28515 | 0.65137  |
| H      | -2.86136 | -0.66799 | -1.30175 |
| O      | -2.70621 | 1.65536  | 0.04838  |
| C      | -3.69203 | -1.10573 | 1.17699  |
| H      | -3.63864 | -1.64554 | 2.1301   |
| H      | -3.89886 | -0.04024 | 1.33864  |
| H      | -4.42142 | -1.56073 | 0.50316  |
| P-OMe2 |          |          |          |



|         |          |          |          |
|---------|----------|----------|----------|
| C       | -0.23522 | -0.00519 | -0.43594 |
| C       | -1.07476 | 1.03289  | -0.23693 |
| C       | -2.66021 | -0.78763 | -0.00081 |
| S       | -1.06226 | -1.57441 | -0.34585 |
| N       | -2.48814 | 0.69424  | -0.02212 |
| C       | 1.21923  | -0.01602 | -0.70879 |
| C       | 2.00978  | -0.17076 | 0.58896  |
| H       | 1.52234  | 0.92248  | -1.23165 |
| H       | 1.49168  | -0.82755 | -1.42345 |
| H       | 1.78445  | 0.63478  | 1.31337  |
| H       | 1.82333  | -1.14479 | 1.08098  |
| Cl      | 3.75771  | -0.08285 | 0.1997   |
| C       | -0.77943 | 2.48323  | -0.24971 |
| H       | -0.94151 | 2.92608  | 0.74851  |
| H       | 0.25409  | 2.70169  | -0.55018 |
| H       | -1.45244 | 3.02192  | -0.93959 |
| O       | -2.65659 | -0.05281 | 1.23326  |
| H       | -3.57354 | -1.29185 | -0.31123 |
| O       | -3.19971 | 1.67966  | -0.66517 |
| C       | -4.34994 | 2.37265  | -0.1736  |
| H       | -4.26729 | 2.49403  | 0.88627  |
| H       | -4.41292 | 3.33414  | -0.63887 |
| H       | -5.23028 | 1.80832  | -0.4004  |
| TS-SMe2 |          |          |          |
| C       | 0.42139  | -1.18429 | 0.10069  |
| C       | -0.51413 | -0.60598 | 1.03153  |
| C       | -2.68428 | -1.10822 | -0.0547  |
| C       | -2.55496 | 3.38648  | -0.64249 |
| H       | -3.51912 | 3.19577  | -0.15981 |
| H       | -2.12854 | 4.30522  | -0.22722 |
| H       | -2.71103 | 3.50612  | -1.71871 |
| N       | -1.79739 | -0.47855 | 0.82002  |
| S       | -0.02947 | -1.99373 | -1.35018 |
| C       | 1.90777  | -0.95892 | 0.34872  |
| H       | 2.14287  | -0.85258 | 1.40964  |
| H       | 2.48745  | -1.78069 | -0.07516 |
| C       | 2.25717  | 0.33789  | -0.38861 |
| H       | 1.71245  | 1.20663  | -0.02616 |
| H       | 2.16071  | 0.22495  | -1.4651  |
| Cl      | 4.1355   | 0.75708  | -0.10832 |
| C       | 0.01091  | 0.0405   | 2.31195  |
| H       | 0.55795  | -0.68198 | 2.93104  |
| H       | 0.6652   | 0.88956  | 2.0906   |
| H       | -0.85212 | 0.41176  | 2.86544  |
| H       | -2.98872 | -0.44505 | -0.87089 |
| O       | -3.19327 | -2.21418 | 0.17291  |

|        |          |          |          |          |
|--------|----------|----------|----------|----------|
| S      | -1.39341 | 1.91676  | -0.2922  | P-SMe1   |
| C      | -0.23522 | -0.00519 | -0.43594 |          |
| C      | -1.07476 | 1.03289  | -0.23693 |          |
| C      | -2.66021 | -0.78763 | -0.00081 |          |
| S      | -1.06226 | -1.57441 | -0.34585 |          |
| N      | -2.48814 | 0.69424  | -0.02212 |          |
| C      | 1.21923  | -0.01602 | -0.70879 |          |
| C      | 2.00978  | -0.17076 | 0.58896  |          |
| H      | 1.52234  | 0.92248  | -1.23165 |          |
| H      | 1.49168  | -0.82755 | -1.42345 |          |
| H      | 1.78445  | 0.63478  | 1.31337  |          |
| H      | 1.82333  | -1.14479 | 1.08098  |          |
| Cl     | 3.75771  | -0.08285 | 0.1997   |          |
| C      | -0.77943 | 2.48323  | -0.24971 |          |
| H      | -0.94151 | 2.92608  | 0.74851  |          |
| H      | 0.25409  | 2.70169  | -0.55018 |          |
| H      | -1.45244 | 3.02193  | -0.93959 |          |
| H      | -3.57354 | -1.29185 | -0.31123 |          |
| O      | -3.19971 | 1.67966  | -0.66517 |          |
| C      | -3.97738 | -1.68501 | 2.06896  |          |
| H      | -3.76259 | -1.59458 | 3.11327  |          |
| H      | -4.77389 | -1.01924 | 1.80968  |          |
| H      | -4.26824 | -2.69128 | 1.85048  |          |
| S      | -2.81124 | -1.35083 | 1.31178  |          |
| P-SMe1 |          |          |          |          |
| 6      | 0        | -0.71479 | 0.34042  | 0.36652  |
| 6      | 0        | -0.71119 | 1.69268  | 0.22746  |
| 6      | 0        | 1.4669   | 1.21846  | -0.28541 |
| 16     | 0        | 0.87247  | -0.36637 | 0.00828  |
| 7      | 0        | 0.56308  | 2.18736  | -0.14031 |
| 6      | 0        | -1.88251 | -0.54122 | 0.70389  |
| 6      | 0        | -2.65362 | -0.91797 | -0.55919 |
| 1      | 0        | -2.55665 | -0.03542 | 1.40096  |
| 1      | 0        | -1.53575 | -1.45391 | 1.19711  |
| 1      | 0        | -3.04876 | -0.04185 | -1.06873 |
| 1      | 0        | -2.04204 | -1.49869 | -1.24572 |
| 17     | 0        | -4.1116  | -1.96657 | -0.17491 |
| 6      | 0        | -1.78917 | 2.70506  | 0.40995  |
| 1      | 0        | -2.69463 | 2.24783  | 0.81326  |
| 1      | 0        | -1.44259 | 3.49604  | 1.08012  |
| 1      | 0        | -2.0281  | 3.1952   | -0.53904 |
| 1      | 0        | 2.50582  | 1.3953   | -0.50911 |
| 8      | 0        | 0.77077  | 3.45183  | -0.28771 |
| 6      | 0        | 4.0171   | -1.96916 | 1.01771  |
| 1      | 0        | 4.43224  | -2.98051 | 0.94595  |
| 1      | 0        | 4.70913  | -1.36834 | 1.61623  |

|         |   |          |          |          |
|---------|---|----------|----------|----------|
| 1       | 0 | 3.07707  | -2.03864 | 1.57919  |
| 16      | 0 | 3.75362  | -1.23245 | -0.65194 |
| P-SMe2  |   |          |          |          |
| C       |   | -0.23522 | -0.00519 | -0.43594 |
| C       |   | -1.07476 | 1.03289  | -0.23693 |
| C       |   | -2.66021 | -0.78763 | -0.00081 |
| S       |   | -1.06226 | -1.57441 | -0.34585 |
| N       |   | -2.48814 | 0.69424  | -0.02212 |
| C       |   | 1.21923  | -0.01602 | -0.70879 |
| C       |   | 2.00978  | -0.17076 | 0.58896  |
| H       |   | 1.52234  | 0.92248  | -1.23165 |
| H       |   | 1.49168  | -0.82755 | -1.42345 |
| H       |   | 1.78445  | 0.63478  | 1.31337  |
| H       |   | 1.82333  | -1.14479 | 1.08098  |
| Cl      |   | 3.75771  | -0.08285 | 0.1997   |
| C       |   | -0.77943 | 2.48323  | -0.24971 |
| H       |   | -0.94151 | 2.92608  | 0.74851  |
| H       |   | 0.25409  | 2.70169  | -0.55018 |
| H       |   | -1.45244 | 3.02192  | -0.93959 |
| S       |   | -3.37301 | 1.91966  | -0.82178 |
| C       |   | -4.83586 | 2.30471  | 0.11641  |
| H       |   | -4.63123 | 3.1211   | 0.77711  |
| H       |   | -5.62673 | 2.57588  | -0.55134 |
| H       |   | -5.12898 | 1.44859  | 0.68742  |
| O       |   | -2.81124 | -1.35083 | 1.31178  |
| H       |   | -1.94481 | -1.51384 | 1.69168  |
| TS-diol |   |          |          |          |
| C       |   | -0.16378 | 0.06554  | -0.62447 |
| C       |   | 0.79385  | 0.98724  | -0.40271 |
| C       |   | 2.2022   | -0.90045 | -0.34424 |
| H       |   | 1.97019  | -0.92473 | 2.03923  |
| O       |   | 2.82778  | -1.01416 | 1.53536  |
| N       |   | 2.10258  | 0.45033  | -0.35955 |
| S       |   | 0.58974  | -1.63324 | -0.73035 |
| H       |   | 3.10384  | -1.41455 | -0.62549 |
| O       |   | 3.15305  | 1.11242  | 0.37346  |
| C       |   | -1.64815 | 0.22673  | -0.72686 |
| H       |   | -1.88269 | 1.27465  | -0.93798 |
| H       |   | -2.05865 | -0.37607 | -1.54386 |
| C       |   | -2.31351 | -0.18721 | 0.59172  |
| H       |   | -2.03579 | 0.46143  | 1.41957  |
| H       |   | -2.14748 | -1.23476 | 0.83472  |
| Cl      |   | -4.20623 | -0.00641 | 0.42258  |
| C       |   | 0.68594  | 2.46689  | -0.19842 |
| H       |   | 0.75613  | 2.99755  | -1.15525 |
| H       |   | -0.2481  | 2.74172  | 0.29565  |

|        |          |          |          |
|--------|----------|----------|----------|
| H      | 1.54842  | 2.74843  | 0.41426  |
| H      | 3.16015  | 0.07631  | 1.23701  |
| P-diol |          |          |          |
| C      | 0.13736  | -0.00325 | -0.5139  |
| C      | -0.72392 | 1.02515  | -0.38136 |
| C      | -2.35751 | -0.81889 | -0.30744 |
| S      | -0.65973 | -1.57562 | -0.45588 |
| N      | -2.14198 | 0.67     | -0.33423 |
| C      | 1.60578  | 0.01457  | -0.7081  |
| C      | 2.32584  | -0.23104 | 0.61585  |
| H      | 1.92982  | 0.98705  | -1.14724 |
| H      | 1.91892  | -0.7453  | -1.46177 |
| H      | 2.04149  | 0.50629  | 1.3894   |
| H      | 2.13829  | -1.24723 | 1.01287  |
| Cl     | 4.09197  | -0.0745  | 0.33816  |
| C      | -0.41558 | 2.47537  | -0.3376  |
| H      | -0.92478 | 2.96201  | 0.5123   |
| H      | 0.6603   | 2.67235  | -0.23656 |
| H      | -0.76632 | 2.98187  | -1.25176 |
| H      | -3.00645 | -1.13382 | -1.15842 |
| O      | -2.66772 | 1.19361  | 0.88337  |
| H      | -3.57342 | 1.55055  | 0.6037   |
| O      | -2.98906 | -1.27382 | 0.8356   |
| H      | -2.6094  | -0.87722 | 1.66588  |
| TS-R1  |          |          |          |
| C      | 0.02455  | -0.13038 | -0.33516 |
| C      | -0.73993 | 1.02189  | -0.25593 |
| C      | -2.82548 | 0.06491  | -0.80568 |
| S      | -0.53022 | -1.74987 | 0.17391  |
| N      | -2.11713 | 0.81711  | 0.0406   |
| C      | 1.49235  | -0.0459  | -0.72777 |
| C      | 2.3539   | -0.17257 | 0.5309   |
| H      | 1.72314  | 0.88952  | -1.24332 |
| H      | 1.72235  | -0.881   | -1.39486 |
| H      | 2.20385  | 0.64235  | 1.23591  |
| H      | 2.23395  | -1.14302 | 1.00421  |
| Cl     | 4.20089  | -0.05975 | 0.03842  |
| C      | -0.26458 | 2.45388  | -0.22156 |
| H      | 0.82316  | 2.51702  | -0.27365 |
| H      | -0.68274 | 3.04617  | -1.04557 |
| H      | -0.58469 | 2.91701  | 0.72163  |
| H      | -2.86718 | 0.37528  | -1.84208 |
| O      | -2.47728 | 0.56985  | 1.49167  |
| H      | -3.17966 | 1.27399  | 1.64394  |
| O      | -3.39582 | -1.06858 | -0.47705 |
| H      | -2.764   | -1.50448 | 0.24822  |

## TS-R2

|    |          |          |          |
|----|----------|----------|----------|
| C  | 0.07488  | 0.08103  | -0.4424  |
| C  | -0.74772 | 1.13816  | -0.29912 |
| C  | -2.38348 | -0.68402 | -0.58854 |
| S  | -0.69075 | -1.5931  | -0.1533  |
| N  | -2.10648 | 0.70195  | 0.0396   |
| C  | 1.55046  | 0.12091  | -0.72421 |
| C  | 2.32607  | -0.23992 | 0.54921  |
| H  | 1.84948  | 1.11872  | -1.05682 |
| H  | 1.80147  | -0.59546 | -1.51295 |
| H  | 2.17706  | 0.48251  | 1.34824  |
| H  | 2.12657  | -1.25376 | 0.88911  |
| Cl | 4.19303  | -0.19415 | 0.16417  |
| C  | -0.465   | 2.60794  | -0.33749 |
| H  | -0.67482 | 3.04127  | 0.6485   |
| H  | 0.57833  | 2.8046   | -0.59187 |
| H  | -1.10617 | 3.11037  | -1.0711  |
| H  | -2.29842 | -0.56873 | -1.67516 |
| O  | -2.08775 | 0.46626  | 1.54372  |
| H  | -2.86282 | -0.20568 | 1.55562  |
| O  | -3.64002 | -0.81908 | -0.04584 |
| H  | -3.38391 | 0.62053  | -0.07661 |

## P-R1

|    |          |          |          |
|----|----------|----------|----------|
| C  | -0.09863 | 0.15868  | -0.19736 |
| C  | 0.89431  | -0.62565 | 0.25551  |
| C  | 3.32168  | -0.26964 | -0.31032 |
| S  | 0.17322  | 1.86351  | -0.55903 |
| N  | 2.21174  | -0.12073 | 0.61503  |
| C  | -1.47061 | -0.30947 | -0.55125 |
| C  | -2.51482 | 0.28527  | 0.38824  |
| H  | -1.52674 | -1.42398 | -0.52738 |
| H  | -1.70893 | -0.03984 | -1.60719 |
| H  | -2.29069 | 0.07781  | 1.45019  |
| H  | -2.62655 | 1.37877  | 0.25318  |
| Cl | -4.10469 | -0.46552 | 0.01686  |
| C  | 0.82012  | -2.10397 | 0.44598  |
| H  | 1.06955  | -2.39822 | 1.47632  |
| H  | -0.178   | -2.50506 | 0.21498  |
| H  | 1.54601  | -2.61554 | -0.21691 |
| O  | 2.14416  | 1.22453  | 1.06449  |
| H  | 2.46092  | 1.16537  | 2.02931  |
| H  | 0.56328  | 2.32547  | 0.65317  |
| O  | 3.41046  | -1.27072 | -0.9796  |
| H  | 4.06786  | 0.53604  | -0.23701 |

## P-R2

|   |         |          |          |
|---|---------|----------|----------|
| C | 0.33073 | -0.04601 | -0.60421 |
|---|---------|----------|----------|

|    |          |          |          |
|----|----------|----------|----------|
| C  | 1.27878  | -0.88678 | -0.12502 |
| C  | 0.36736  | 2.58585  | 0.48736  |
| S  | 0.77541  | 1.60515  | -0.97174 |
| N  | 2.55812  | -0.36606 | 0.28049  |
| C  | -1.09362 | -0.40696 | -0.85422 |
| C  | -1.89702 | -0.32333 | 0.44143  |
| H  | -1.17039 | -1.4303  | -1.28787 |
| H  | -1.54736 | 0.25443  | -1.62711 |
| H  | -1.51885 | -1.01322 | 1.21665  |
| H  | -1.90205 | 0.70129  | 0.86769  |
| Cl | -3.59767 | -0.78431 | 0.08675  |
| C  | 1.03446  | -2.33415 | 0.14314  |
| H  | 0.84039  | -2.50958 | 1.21307  |
| H  | 0.16755  | -2.72382 | -0.41185 |
| H  | 1.90586  | -2.95185 | -0.13528 |
| H  | 0.71177  | 3.6204   | 0.35975  |
| O  | 3.54216  | -1.39109 | 0.32537  |
| H  | 3.66056  | -1.55956 | 1.31629  |
| O  | -0.21685 | 2.13706  | 1.42855  |
| H  | 2.97295  | 0.32604  | -0.36389 |
